# Supplementary material for: First identification of an evolving Middle Stone Age ochre culture at Porc-Epic Cave, Ethiopia
Source: PubMed Central journal article supplement (PMC10491814; doi:10.1038/s41598-023-39957-y), 2023-09-08
Supplement: 41598_2023_39957_MOESM1_ESM.pdf [file 41598_2023_39957_MOESM1_ESM.pdf]

# Supplementary online material

## First identification of an evolving Middle Stone Age ochre culture at Porc-Epic Cave, Ethiopia

Daniela Eugenia Rosso<sup>1,2\*</sup>, Martine Regert<sup>2</sup>, Francesco d'Errico<sup>3,4</sup>

<sup>1</sup> Departament de Prehistòria, Arqueologia i Història Antiga, Grupo de Investigación Prehistoria del Mediterráneo Occidental (PREMEDOC), Universitat de València, Valencia, Spain.

<sup>2</sup> Université Côte d'Azur, CNRS, CEPAM, Nice, France.

<sup>3</sup> PACEA UMR 5199, Université de Bordeaux, CNRS, Pessac, France.

<sup>4</sup> SFF Centre for Early Sapiens Behaviour (SapienCE), University of Bergen, Bergen, Norway.

\* Corresponding author

Email: [daniela.rosso@uv.es](mailto:daniela.rosso@uv.es)

### Table of contents

|                                                                          |    |
|--------------------------------------------------------------------------|----|
| S1 - Theoretical background and early pigment use in eastern Africa..... | 2  |
| S2 – Archaeological context.....                                         | 5  |
| S3 – Previous research: ochre processing tools.....                      | 9  |
| S4 – Previous research: ochre pieces.....                                | 14 |
| S5 – Ochre pieces: elemental data.....                                   | 20 |
| S6 – Ochre pieces: mineralogical data .....                              | 32 |
| S7 – Methods.....                                                        | 42 |
| Supplementary references.....                                            | 46 |

## **S1 - Theoretical background and early pigment use in eastern Africa**

Over the past few years different criteria have been proposed to assess the behavioural complexity of early hominins <sup>1-3</sup>. Among these, systematic use of ochre is considered as a key behavioural marker to infer cultural complexity <sup>4-6</sup>. Many interpret the use of ochre as a proxy for the origin of symbolic thinking <sup>4,6-17</sup>. However, this view remains controversial as ochre may also have been used for utilitarian functions such as an ingredient in adhesives, a constituent of hide tanning compounds, an insect repellent, a sunscreen or an antiseptic <sup>18-31</sup>. Today, the idea that the earliest use of ochre fulfilled multiple functions, supported by ethnographic evidence <sup>32,33</sup>, has become widespread in the archaeological literature, though criteria to distinguish functional from symbolic uses or establish that both were in existence remain largely elusive <sup>1,34</sup>.

Evidence for ochre processing is reported in numerous Middle Stone Age (MSA) sites from Africa <sup>1,3,7,10,13,35-43</sup> and Middle Palaeolithic sites from Europe <sup>17,44-48</sup> and Western Asia <sup>49-52</sup>. In East Asia, only a few sites have yielded ochre pieces older than 50,000 years <sup>53,54</sup> and some of these instances still need an in-depth evaluation to verify their anthropogenic origin. Recent discoveries have revealed clear evidence for ochre processing around 40 ka in this region <sup>55</sup>.

However, as already mentioned, the way in which ochre was used at early sites and the role it played in these societies remains unclear. This is partly due to the rarity of comprehensive analyses of ochre collections. Only few studies combine technological and morphometric analysis with physico-chemical characterisation of ochre, and even fewer include the study of associated ochre-stained objects and artefacts <sup>13,37,56-59</sup>. This problem is particularly evident in eastern Africa, where systematic studies of ochre assemblages have only started to be conducted in the past few years <sup>7,60,61</sup>.

The earliest possible evidence for pigment use in eastern Africa comes from the sites of Gadeb, Ethiopia <sup>62</sup> and Olduvai Gorge, Tanzania <sup>63</sup>, and dates back to the Early Stone Age, around 1.5-1.0 Ma BP. By “eastern Africa”, we refer to the area including modern-day countries of Eritrea, Ethiopia, South Sudan, Sudan, Somalia, Djibouti, Kenya, Uganda and Tanzania <sup>64,65</sup>. At Gadeb, Ethiopia, evidence consists of fragments of weathered basalt producing red streaks <sup>62</sup>. At Olduvai Gorge, Tanzania, two lumps of red

ochre were, according to the discoverer, clearly brought to the site by *Homo erectus* <sup>63</sup>. At Garba I, Melka Kunture, Ethiopia, an area of two to three square metres, identified in levels dated to c. 500 ka BP, was stained red and associated with small elongated and rounded ochre lumps <sup>66</sup>. In the Kapthurin Formation, GnJh-15 site, Kenya, >70 pieces of red ochre, with a weight of >5 kg and possible grindstones stained with ochre were reported in layers dated 500–284 ka <sup>3,65,67,68</sup>. Excavations conducted at Olorgesailie, Kenya, have revealed the presence of 86 lumps of potential black pigment and two red ochre pieces in levels dated from ~320 to  $\geq 295$  ka <sup>7</sup>. Geochemical analyses show that these rocks are exogenous. The red pieces bear striations produced by grinding. One shows anthropogenic notches and the other a possible perforation attempt.

MSA levels of site Sai 8-B-11, at Sai Island, Sudan <sup>69,70</sup>, dated to c. 180 ka, yielded yellow and red ochre pieces associated with ochre processing tools (sandstone mortars shaped by knapping and small chert pebbles that show the presence of yellow and red residues). From 160 ka, systematic use of ochre becomes ubiquitous <sup>42,43</sup>. Numerous late MSA sites from eastern Africa have yielded ochre pieces that are sometimes associated with grindstones. Their number is probably underrepresented. Interest in pigment use is relatively recent, and so it is likely that an undetermined number of finds were not systematically reported in the past. Except for a few cases, ochre assemblages from this region are only briefly described in the literature.

In Tanzania, evidence for MSA ochre use was found in Mumba <sup>65,71–75</sup> and Nasera rock shelters <sup>65,74,76</sup>. In Mumba, it consists of worked pieces of yellow and red ochre from levels dated to c. 100–50 ka <sup>71</sup>. Grindstones were also found at both sites but it is unclear whether they preserve ochre residues. At Kisesse II Rockshelter, Tanzania, red and more rarely orange and yellow ochre was identified in levels >45 ka cal BP <sup>77–79</sup>. Ochre pieces showing wear-facets were also recovered from levels dated to >43 ka cal BP. “Stone palettes” with ochre-stained surfaces are reported in levels dated 39.6–34.3 ka cal BP.

Recent excavations at Panga ya Saidi, Kenya, have revealed the presence of 17 ochre fragments probably used to produce ochre powder in layers dated to c. 48–14.5 ka <sup>41,60</sup>. Two of them, recovered from layers dated c. 48–25 ka, bear traces of modification. Two flakes with traces of red ochre and one small ochre-stained lower grindstone were recovered at Enkapune Ya Muto, Kenya, in levels probably older than 41,400±700 BP <sup>80</sup>. At Mochena Borago Rock Shelter, Ethiopia <sup>81,82</sup>, ongoing research <sup>83</sup> has revealed the presence of more than 260 red, yellow, pink, purple, and brown ochre pieces, weighing nearly two kilograms, associated with ochre processing tools, in levels dated between c.

53 and 38 ka cal BP. More than half bear traces of modification, including rubbing, grinding and less frequently scoring and engraving marks. Red and grey pigments were found in MSA levels at Gorgora Rock Shelter, Ethiopia <sup>84-86</sup>. The presence of ochre was also reported at Aduma <sup>87</sup> and Goda Buticha <sup>88-90</sup>, Ethiopia. Porc-Epic Cave, Ethiopia, has yielded the largest late MSA ochre assemblage in the region <sup>61,91,92</sup>, which is the subject of the present study.

## S2 – Archaeological context

Porc-Epic Cave is located 3 km south of Dire Dawa in Ethiopia, near the top of the Garad Erer hill, between the Afar Depression and the Somali Plateau (S2 Supplementary Fig. 1). It opens at the base of a Jurassic limestone cliff, 140 m above the wadi Laga Dächatu, whose main channel course has a length of over 50 km.

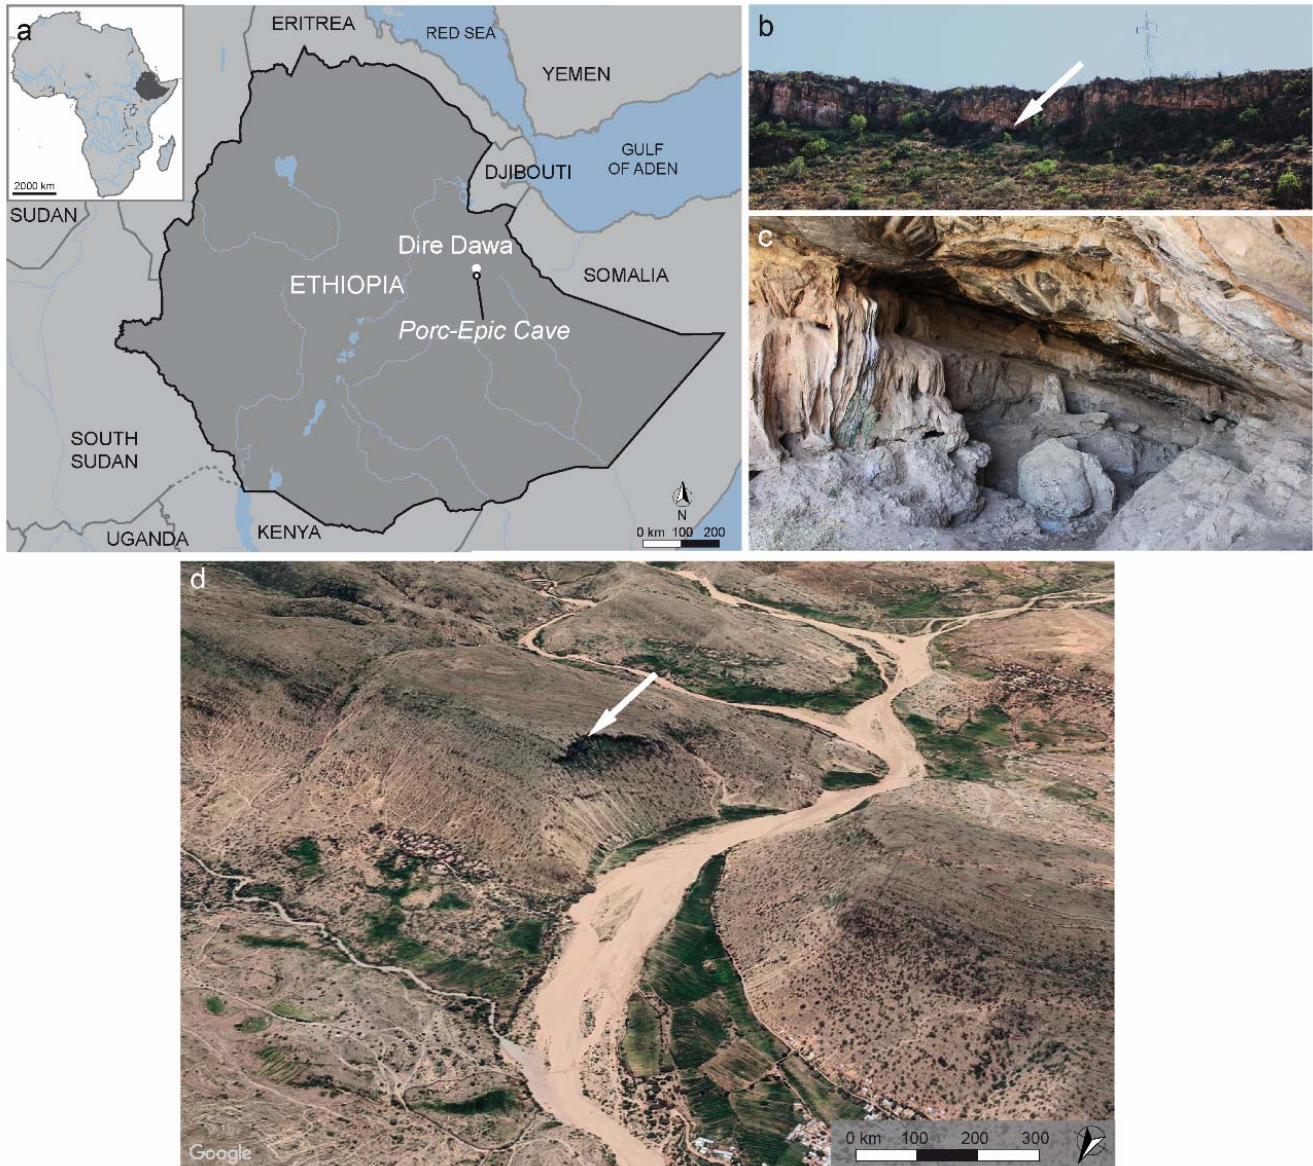

### S2 Supplementary Figure 1. Location of Porc-Epic Cave.

(a) Location of the site. (b) View of the top of Garad Erer hill. The arrow indicates the cave entrance. (c) View of the cave (photo A. Herrero). (d) View of Garad Erer hill and wadi Laga Dächatu. The arrow indicates the cave entrance (copyright: Google Earth). Modified after <sup>91</sup> under a CC BY license, with permission from PLOS ONE, original copyright 2016.

The cave was discovered in 1929 by Pierre Teilhard de Chardin and Henry de Monfreid, who excavated a test pit to evaluate the archaeological potential of the site <sup>93</sup>. In 1933, Henri Breuil and Paul Wernert extended the excavation <sup>94</sup> and described the “later schematic style” of the cave’s rock art <sup>95,96</sup>. John Desmond Clark excavated a trench in 1974 <sup>95,97</sup>, and in 1975–1976 Kenneth D. Williamson directed an excavation over a surface of approximately 49 m<sup>2</sup> and a depth of 3 m. In 1998, fieldwork conducted by a team from the *Muséum National d’Histoire Naturelle*, Paris, France, and the Authority for Research and Conservation of Cultural Heritage (ARCCH) of Ethiopia helped clarify the Porc-Epic stratigraphy <sup>98</sup>.

The stratigraphy of the cave comprises a succession of clayish levels, sandy levels and breccia and was divided into seven units (S2 Supplementary Fig. 2) that are described in detail elsewhere <sup>92,95</sup>. MSA material was recovered from levels 2, 3C/D and 4A/B <sup>95</sup>, approximately 60 to 220–230 cm below datum. The overlying layers (6, 7A and 7B) are composed of fine sands and loam with interstratified hearth material containing LSA and Neolithic artefacts <sup>99</sup>.

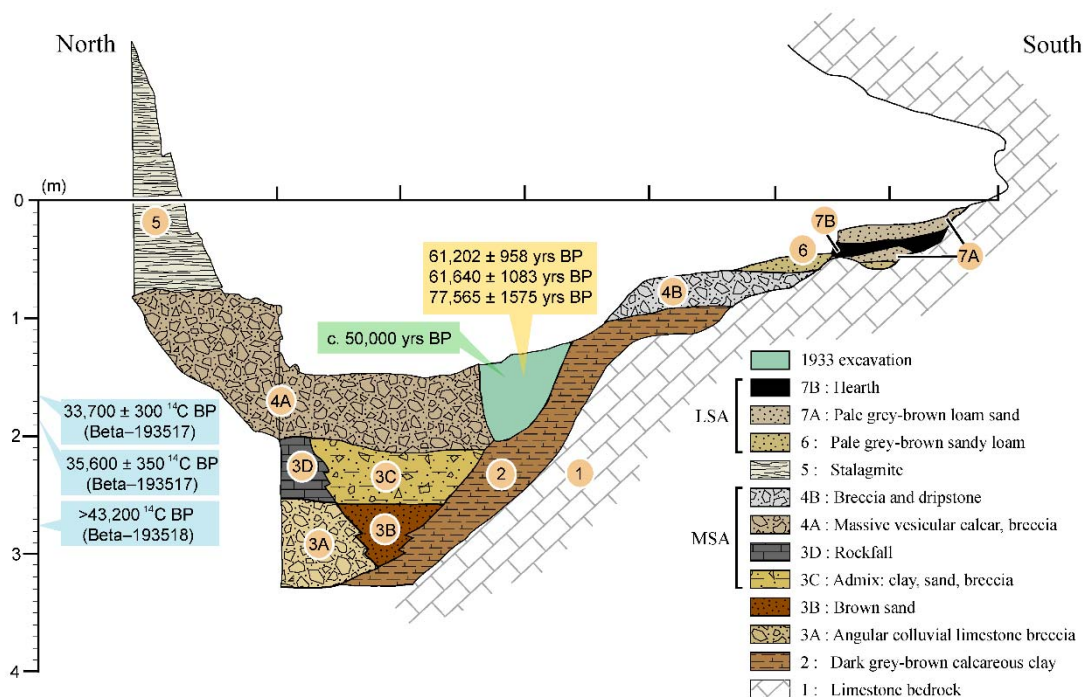

**S2 Supplementary Figure 2. Porc-Epic Cave's stratigraphy.**

Eastern profile (09W-10W) at the end of the 1974 excavation. The gamma-spectrometry age of a human mandible and the obsidian hydration ages for artefacts recovered during the 1933 excavation are indicated in green and orange, respectively. <sup>14</sup>C ages obtained from gastropod opercula are indicated in blue. Their stratigraphic position is approximate, as only the depth and square from which these objects were recovered is known, and therefore cannot be correlated with a specific layer. Reprinted from <sup>91</sup> under a CC BY license, with permission from PLOS ONE, original copyright 2016.

Different attempts have been made to date the sequence, but the chronology of the site remains unclear<sup>92</sup>. Three artefacts were dated by obsidian hydration to  $61,202 \pm 958$ ,  $61,640 \pm 1083$ , and  $77,565 \pm 1575$ <sup>100</sup>, but this dating method is now considered unreliable<sup>101,102</sup>. High-resolution, low-background gamma-ray spectrometry analyses of a human mandible produced an age of c. 50 ka<sup>88</sup>. Accelerator mass spectrometry (AMS) radiocarbon determinations for three *Revoilia* gastropod opercula<sup>99</sup> yielded uncalibrated <sup>14</sup>C ages of  $33,700 \pm 300$  (Beta-193517),  $35,600 \pm 350$  (Beta-193516), and  $>43,200$  (Beta-193518), suggesting that the sequence may have accumulated over at least 4,500 years<sup>92,103</sup>. The 95.4% probability range of the two finite ages<sup>104</sup> are 38,800–37,049 cal BP, and 41,084–39,421 cal BP (IntCal13; OxCal 4.2). The stalagmite that seals the breccia containing the main MSA levels yielded a <sup>14</sup>C age of  $4,590 \pm 60$  BP and U–Th age of  $6,270 \pm 1020$  BP<sup>95</sup>. Charcoal fragments recovered in the uppermost breccia have been dated to  $5,700 \pm 110$  BP.

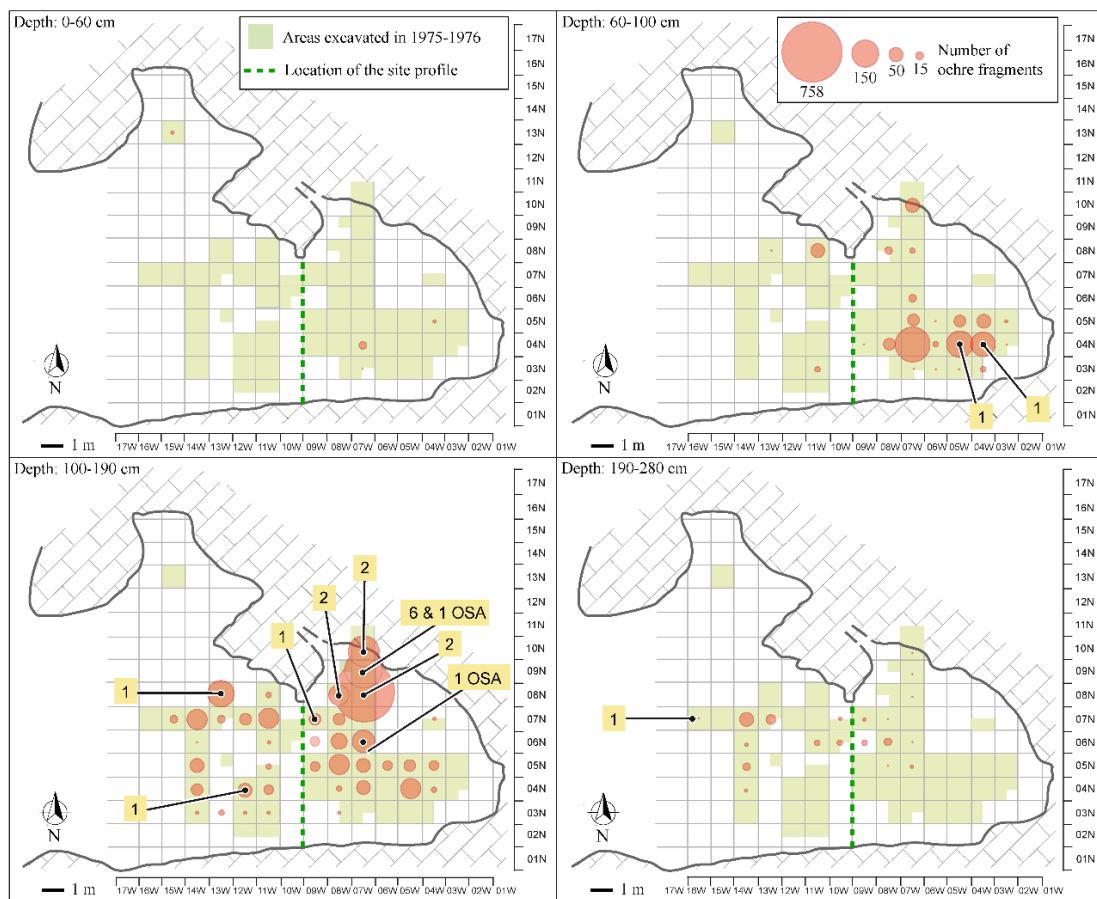

**S2 Supplementary Figure 3. Spatial distribution of ochre pieces, ochre processing tools and ochre-stained artefacts.**

Bubble sizes reflect the frequency of ochre pieces per grid unit. Numbers indicate ochre processing tools and ochre-stained artefacts (OSA) when indicated. Reprinted from<sup>61</sup> under a CC BY license, with permission from PLOS ONE, original copyright 2017.

Finds from the MSA layers at Porc-Epic Cave include stone tools <sup>88,95,98,105–112</sup>, faunal remains <sup>99,113,114</sup>, a human mandible <sup>114,115</sup> and gastropod opercula <sup>103</sup>, ochre and ochre processing tools <sup>61,91,92</sup>. For a summary of previous research, see <sup>61</sup>.

Evidence for ochre use at Porc-Epic Cave was first reported by Breuil and Wernert <sup>105</sup>. Clark and Williamson <sup>95</sup> recovered 214 ochre pieces and one limestone grindstone during the 1974 excavations. Ochre pieces and ochre-stained artefacts were also collected during the 1975–1976 excavations by Williamson but were not mentioned in the literature before their reassessment by us <sup>92</sup>. They include 4213 pieces (c. 40 kg) of red, brown and yellow iron-rich ochre pieces <sup>61</sup>, as well as 21 ochre processing tools and two ochre-stained artefacts <sup>91</sup> found throughout the sequence, in different areas of the cave (S2 Supplementary Fig. 3).



### S3 – Previous research: ochre processing tools

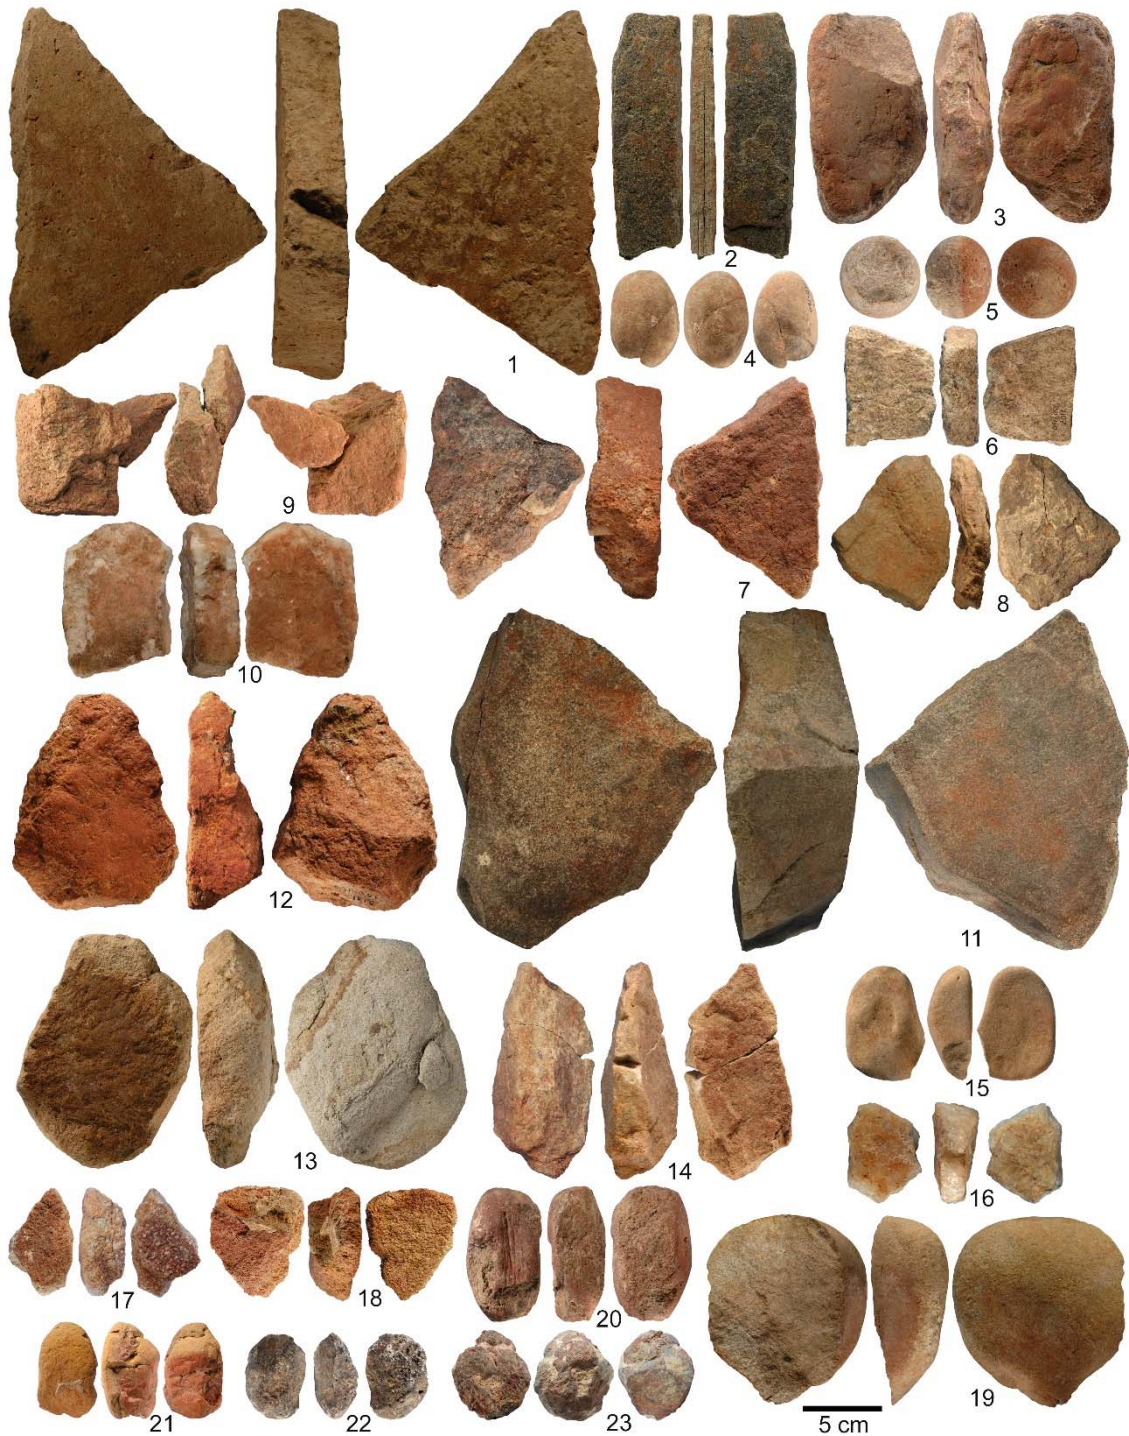

**S3 Supplementary Figure 1. Ochre processing tools and ochre-stained artefacts found at Porc-Epic Cave.**

Numbers correspond to the objects' identification number. Reprinted from <sup>91</sup> under a CC BY license, with permission from PLOS ONE, original copyright 2016.

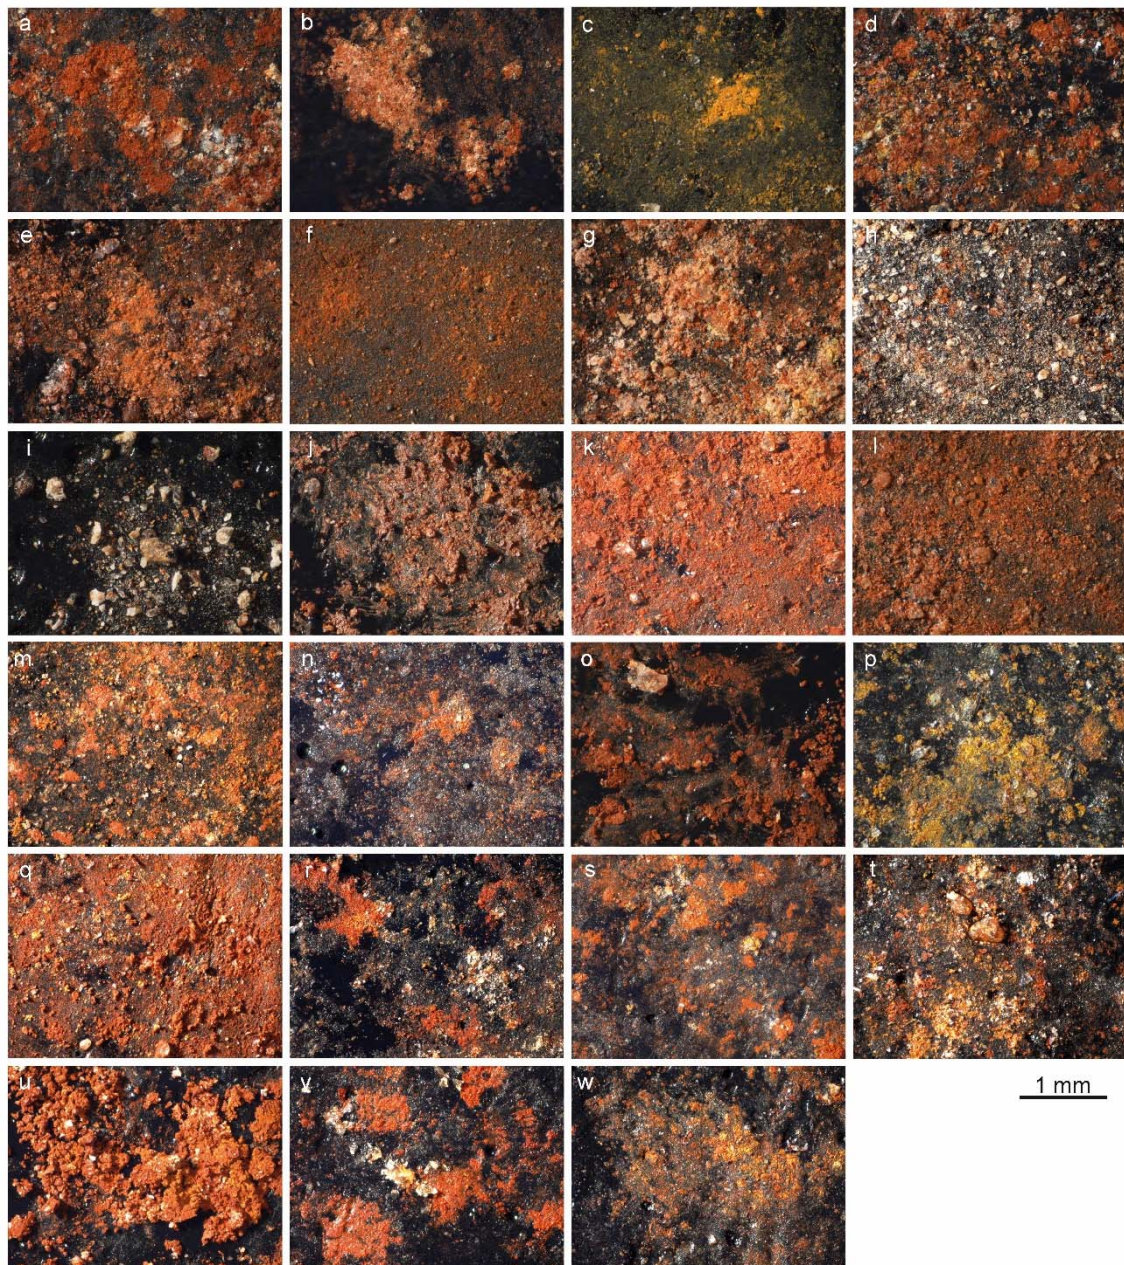

**S3 Supplementary Figure 2. Ochre residues from ochre processing tools on carbon adhesive tabs.**

a: sample AT1A (OPT 1); b: sample AT1B (OPT 1); c: sample AT2A (OPT 2); d: sample AT2B (OPT 2); e: sample AT3 (OPT 3); f: sample AT4 (OPT 4); g: sample AT5 (OSA 5); h: sample AT6A (OPT 6); i: sample AT6B (OPT 6); j: sample AT7 (OPT 7); k: sample AT8 (OPT 8); l: sample AT9 (OPT 9); m: sample AT10 (OPT 10); n: sample AT11 (OPT 11); o: sample AT12 (OPT 12); p: sample AT13 (OPT 13); q: sample AT14 (OPT 14); r: sample AT15 (OSA 15); s: sample AT16 (OPT 16); t: sample AT17 (OPT 17); u: sample AT18 (OPT 18); v: sample AT19 (OPT 19); w: sample AT22 (OPT 22). Reprinted from <sup>91</sup> under a CC BY license, with permission from PLOS ONE, original copyright 2016.

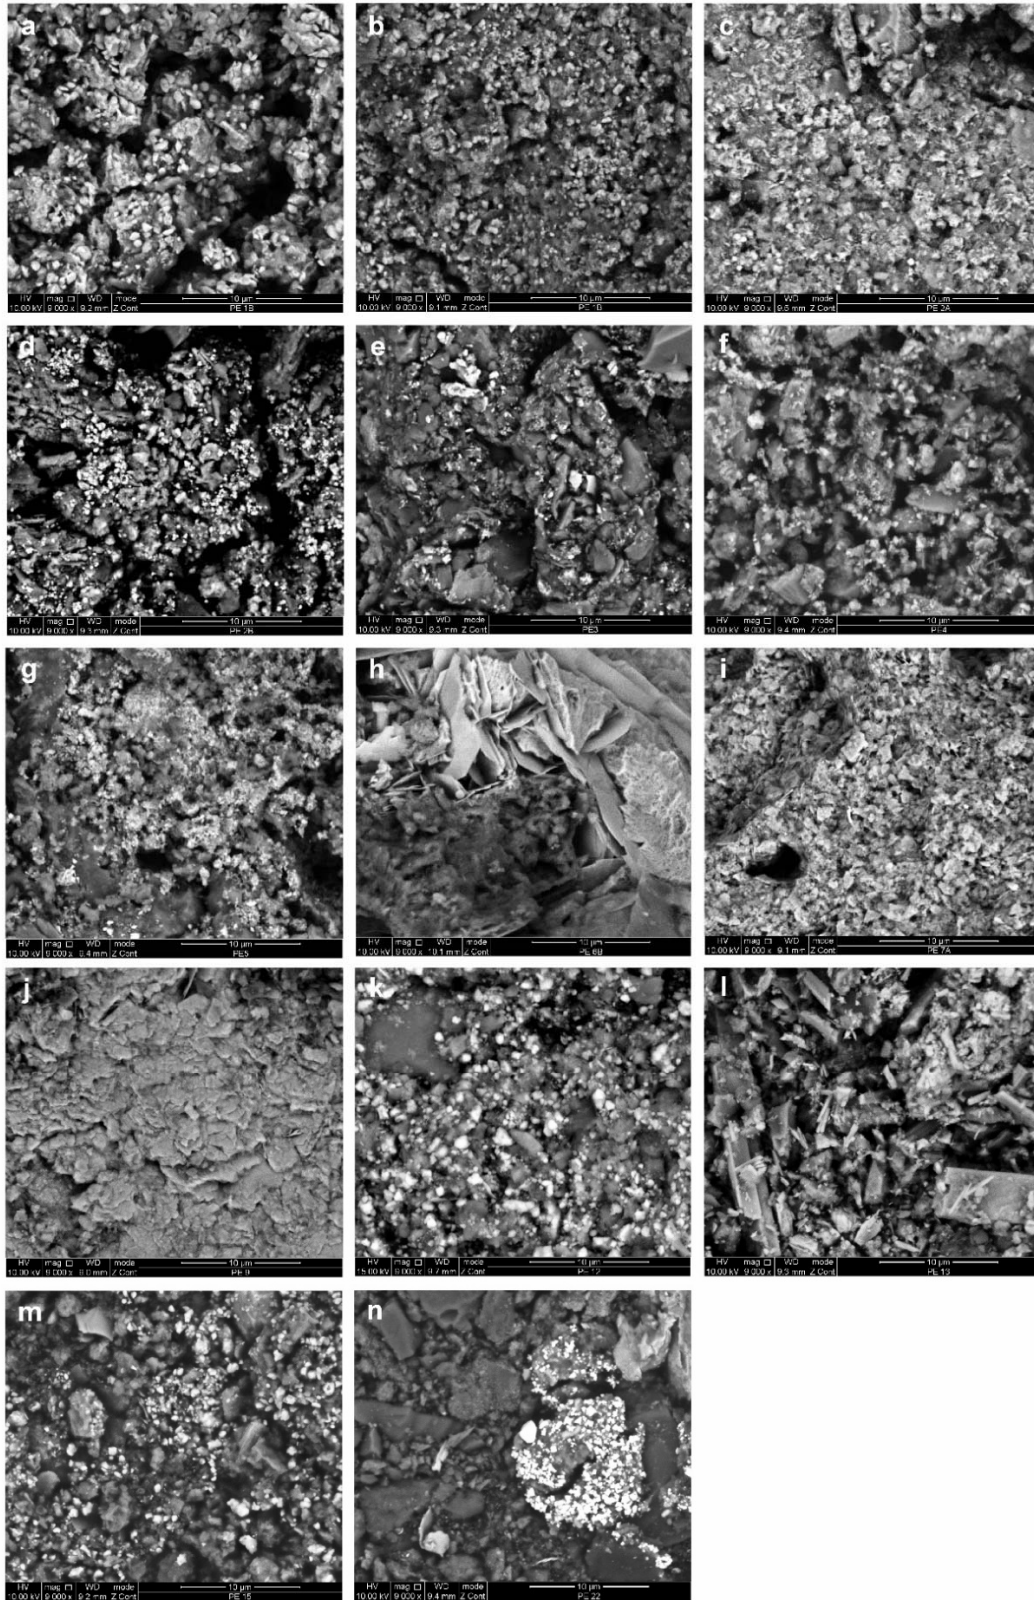

**S3 Supplementary Figure 3. SEM images of ochre residues from Porc-Epic Cave's ochre processing tools and ochre-stained artefacts.**

All figures are in backscattered electron (BSE) mode. a: OPT 1, sample AT1 zone 1; b: OPT 1, sample AT1 zone 2; c: OPT 2, sample AT2A; d: OPT2, sample AT2B; e: OPT 3, sample AT3; f: OPT 4, sample AT4; g: OSA 5, sample AT5; h: OPT 6, sample AT6; i: OPT 7, sample AT7; j: OPT 9, sample AT9; k: OPT 12, sample AT 12; l: OPT 13, sample AT13; m: OSA 15, sample AT15; n: OPT 22, sample AT22. Scales = 10 µm. Reprinted from <sup>91</sup> under a CC BY license, with permission from PLOS ONE, original copyright 2016.

**S3 Supplementary Table 1. Results of SEM-EDS analyses on residues from Porc-Epic Cave's ochre processing tools and ochre-stained artefacts.**

| Num | Clay-sized particles (<4µm) |                                                                                      | Silt and sand-sized particles (>4µm) |                                                |
|-----|-----------------------------|--------------------------------------------------------------------------------------|--------------------------------------|------------------------------------------------|
|     | Shape                       | Composition*                                                                         | Shape                                | Composition*                                   |
| 1   | Aggl                        | Fe ( <i>iron oxide</i> )                                                             | Irreg                                | Fe, Mn ( <i>iron oxide</i> )                   |
|     |                             |                                                                                      | Plat                                 | Si, Al, K, Na ( <i>K-rich mica</i> )           |
|     | Plat                        | Si, Al, Ca, K ( <i>clay minerals</i> )                                               | Ang                                  | Ca, Mg ( <i>carbonate</i> )                    |
|     |                             |                                                                                      | Irreg                                | Ba, S ( <i>Ba-rich sulphate</i> )              |
| 2   | Aggl                        | Fe ( <i>iron oxide</i> )                                                             | Irreg                                | Fe, Cr, Ni ( <i>undet</i> )                    |
|     |                             |                                                                                      | Ang                                  | Si ( <i>silicate</i> )                         |
|     | Plat                        | Si, Al, Ca, K, Mg ( <i>clay minerals</i> )                                           | Irreg                                | Si, Al, Ca, K, Na ( <i>Ca-rich feldspar</i> )  |
| 3   | Aggl                        | Fe ( <i>iron oxide</i> )                                                             | Irreg                                | Fe, Cr, Ni ( <i>undet</i> )                    |
|     |                             |                                                                                      | Subcirc                              | Fe ( <i>iron oxide</i> )                       |
|     | Plat                        | Si, Al, Ca ( <i>clay minerals</i> )                                                  | Irreg/ang                            | Si ( <i>silicate</i> )                         |
| 4   | Aggl                        | Fe, Si, Al, Ca, K, Mg, Na, Ti ( <i>mixture of iron oxides and aluminosilicates</i> ) | Oct                                  | Fe, Ti ( <i>undet oxide</i> )                  |
|     | Plat                        | Si, Al, Ca ( <i>clay minerals</i> )                                                  | Ang                                  | Si ( <i>silicate</i> )                         |
| 5   | Irreg/acic                  | Fe ( <i>iron oxide</i> )                                                             | Irreg                                | Fe ( <i>iron oxide</i> )                       |
|     |                             |                                                                                      | Irreg                                | Si, Al, Na, K ( <i>feldspar</i> )              |
|     | Aggl                        | Si, Al, K, Ca ( <i>clay mineral</i> )                                                | Irreg                                | Si ( <i>silicate</i> )                         |
| 6   | Aggl                        | Si, Al, Mg, K ( <i>clay mineral</i> )                                                | Irreg/plat                           | Fe, Ti ( <i>undet oxide</i> )                  |
|     |                             |                                                                                      | Ang                                  | Si ( <i>undet silicate</i> )                   |
|     |                             |                                                                                      | Irreg                                | Fe ( <i>iron oxide</i> )                       |
| 7   | Aggl                        | Fe ( <i>iron oxide</i> )                                                             | Aggl                                 | Si, Al, Ca, Na ( <i>Ca, Na-rich feldspar</i> ) |
|     |                             |                                                                                      | Aggl                                 | Si, Al, Ca ( <i>undet aluminosilicate</i> )    |
|     |                             |                                                                                      | Irreg                                | Si ( <i>silicate</i> )                         |
|     |                             |                                                                                      |                                      |                                                |
| 9   | Aggl                        | Fe ( <i>iron oxide</i> )                                                             | Irreg                                | Si ( <i>silicate</i> )                         |
|     | Aggl                        | Si, Al, Ca, K, Na ( <i>clay minerals</i> )                                           | Irreg                                | Si, K, Al ( <i>feldspar</i> )                  |
| 12  | Irreg                       | Fe ( <i>iron oxide</i> )                                                             | Irreg                                | Fe, Si, Al, Mg, K, Cl, Ca ( <i>undet</i> )     |
|     |                             |                                                                                      | Subcirc                              | Si, Ca, Al, K ( <i>Ca-rich feldspar</i> )      |
|     | Plat                        | Si, Al, Ca, K, Mg ( <i>clay minerals</i> )                                           | Plat                                 | Si, Al, K ( <i>K-rich mica</i> )               |
| 13  | Aggl                        | Fe, Si, Al, Ce, La, Nd, Na ( <i>mixture of iron oxides and clay minerals</i> )       | Tab                                  | Si, Na, Al, K ( <i>Na-rich feldspar</i> )      |
|     | Aggl                        | Ba, S ( <i>Ba-rich sulphate</i> )                                                    |                                      |                                                |
| 15  | Aggl                        | Si, Fe, Al, Ca, K, S ( <i>mixture of iron oxides and clay minerals</i> )             | Irreg                                | Fe, Ti ( <i>undet oxide</i> )                  |
| 22  | Aggl                        | Fe, Si, Al ( <i>mixture of iron oxides and aluminosilicates</i> )                    | Ang                                  | Fe ( <i>iron oxide</i> )                       |
|     |                             |                                                                                      | Irreg                                | Fe, Si, Al ( <i>Fe-rich silicate</i> )         |
|     |                             |                                                                                      | Irreg/ang                            | Si, Al ( <i>undet aluminosilicate</i> )        |

Num: number; aggl: agglomerate; irreg: irregular; plat: platy; ang: angular; subcirc: subcircular; oct: octahedral; acic: acicular; tab: tabular. (\*) Interpretation in brackets. The objects' identification number is the same as presented in S3 Supplementary Fig. 1. Reprinted from <sup>91</sup> under a CC BY license, with permission from PLOS ONE, original copyright 2016.

**S3 Supplementary Table 2. Results of  $\mu$ -RS analyses on residues from Porc-Epic Cave's ochre processing tools and ochre-stained artefacts.**

| Num | Sample | ab | an | aug | cal | dol | gth | gp | hem | klm | lep | mag | man | mnt | ms | qz | un. alum. | un. Mn ox. | C |
|-----|--------|----|----|-----|-----|-----|-----|----|-----|-----|-----|-----|-----|-----|----|----|-----------|------------|---|
| 1   | AT1A,B |    |    |     |     |     | •   | •  |     |     |     |     |     |     | •  |    | •         |            |   |
| 2   | AT2A,B |    |    |     |     |     | •   | •  |     |     |     |     |     |     | •  | •  | •         | •          |   |
| 3   | AT3    |    |    |     |     |     |     | •  | •   |     |     |     |     |     |    | •  |           |            |   |
| 4   | AT4    |    |    |     |     |     | •   | •  | •   |     |     |     |     |     |    | •  | •         |            |   |
| 5   | AT5    |    |    |     | •   |     |     | •  | •   |     |     |     |     |     |    | •  |           |            |   |
| 6   | AT6A   |    |    |     |     |     | •   | •  |     |     |     |     |     |     |    |    |           |            |   |
| 7   | AT7    |    |    |     |     |     | •   | •  | •   |     | •   |     |     |     |    | •  |           |            | • |
| 8   | AT8    |    |    |     |     |     | •   | •  | •   |     |     |     |     |     |    | •  |           |            |   |
| 9   | AT9    |    |    |     |     |     | •   | •  | •   |     |     |     |     |     |    | •  |           |            |   |
| 10  | AT10   |    |    |     | •   |     | •   | •  | •   |     |     |     | •   |     |    | •  | •         |            |   |
| 11  | AT11   |    | •  |     |     |     |     | •  | •   |     |     | •   |     |     |    | •  | •         |            |   |
| 12  | AT12   | •  |    |     |     |     |     |    | •   |     |     |     |     |     |    | •  | •         |            |   |
| 13  | AT13   | •  |    |     |     |     | •   | •  | •   |     |     |     |     |     |    | •  |           |            | • |
| 14  | AT14   |    |    |     | •   |     | •   | •  | •   |     |     |     |     | •   |    | •  | •         |            | • |
| 15  | AT15   |    |    |     |     | •   | •   | •  | •   |     |     |     |     | •   |    |    | •         |            |   |
| 16  | AT16   |    |    |     |     |     | •   | •  | •   |     |     |     |     |     |    | •  |           |            |   |
| 17  | AT17   |    |    |     |     |     | •   | •  | •   | •   |     |     |     |     |    | •  |           |            |   |
| 18  | AT18   |    |    |     |     |     | •   | •  | •   |     |     | •   |     |     |    | •  |           |            |   |
| 19  | AT19   |    |    | •   |     |     | •   | •  | •   |     |     | •   |     |     |    | •  |           |            |   |
| 22  | AT22   |    |    |     |     |     | •   | •  | •   |     |     |     |     | •   |    | •  |           |            |   |

Num: number; un: undetermined; alum: aluminosilicate; ox: oxide; C: carbon; abbreviations of minerals are based on the nomenclature suggested by <sup>116</sup> except for lepidocrocite (lep), and manganite (man). The objects' identification number is the same as presented in S3 Supplementary Fig. 1. Reprinted from <sup>91</sup> under a CC BY license, with permission from PLOS ONE, original copyright 2016.

**S3 Supplementary Table 3. Results of XRD analyses on residues from Porc-Epic Cave's ochre processing tools and ochre-stained artefacts.**

| Num | Sample | ab | an | ant | aug | ber | cal | clc | gth | gp | hal | hem | klm | lmt | mc | mgh | mnt | or | qz | ram | sa | sap |   |
|-----|--------|----|----|-----|-----|-----|-----|-----|-----|----|-----|-----|-----|-----|----|-----|-----|----|----|-----|----|-----|---|
| 1   | T1     |    | •  |     |     |     | •   |     |     |    |     | •   | •   |     |    |     |     |    | •  |     |    |     |   |
| 3   | T3     |    |    |     |     | •   |     |     |     |    |     | •   | •   |     |    |     |     |    | •  |     |    |     |   |
| 5   | T5     |    |    |     |     |     |     |     |     | •  |     | •   | •   | •   |    |     | •   |    | •  | •   | •  |     |   |
| 6   | T6     | •  | •  |     | •   |     |     | •   |     |    | •   | •   |     |     |    |     |     |    | •  |     |    |     | • |
| 7   | T7     |    |    |     |     |     |     |     |     |    |     | •   |     |     |    |     |     |    | •  |     |    |     |   |
| 8   | T8     |    |    | •   |     |     |     |     |     |    |     | •   | •   |     |    | •   |     |    | •  |     |    |     |   |
| 9   | T9     | •  | ?  |     |     |     |     |     |     |    |     | •   |     |     | ?  |     | •   |    | •  |     |    |     |   |
| 10  | T10    |    |    |     |     | •   |     |     |     |    |     | •   |     | •   |    |     |     |    | •  |     | •  |     |   |
| 12  | T12    |    |    |     |     |     |     |     | •   |    |     | •   |     |     |    |     |     |    | •  |     |    |     |   |
| 17  | T17    |    |    |     |     | •   |     |     |     |    |     | •   | •   |     |    |     |     |    | ?  | •   |    |     |   |
| 18  | T18    |    |    |     |     |     |     |     |     |    |     | •   | •   |     |    |     |     |    | •  |     |    |     |   |

Num.: number; abbreviations of minerals are based on the nomenclature suggested by <sup>116</sup>, except for bernalite (ber), halloysite (hal) and ramsdellite (ram). The objects' identification number is the same as presented in S3 Supplementary Fig. 1. Reprinted from <sup>91</sup> under a CC BY license, with permission from PLOS ONE, original copyright 2016.

## **S4 – Previous research: ochre pieces**

### **Visual characterisation**

Six types of raw material were identified macroscopically <sup>61</sup>:

**Soft, fine-grained ferruginous rocks (SFG):** homogeneous, fine-grained, clayish rocks with very few or no inclusions.

- Colour: mostly red and dark red, but also grey, brown, orange or yellow and only rarely bear small black spots.
- Morphology: most are slabs (n = 339) or irregular pieces (n = 218), although nodules (n = 117) and pebbles (n = 107) are also observed.
- Texture and density: several examples have a compact structure; others are laminated or show small cavities. Generally light.

**Banded, fine-grained ferruginous rocks (BFG):** rocks with the same texture and appearance as type SFG but with clearly differentiated layers of colours.

- Colour: mostly red and yellow, or red and orange but also dark red, grey or brown.
- Morphology: mostly found as nodules (n = 90), followed by smaller numbers of slabs (n = 23) and irregular pieces (n = 19) or pebbles (n = 14).
- Texture and density: generally light, these materials usually have a compact structure.

**Hard, fine-grained ferruginous rocks (HFG):** very hard and heavy iron oxides.

- Colour: dark colours, mostly grey and red, but also black. They rarely show brown, yellow, dark red, grey and orange spots.
- Morphology: usually occur as nodules (n = 51) and pebbles (n = 45) and more rarely as slabs (n = 33) and irregular pieces (n = 24).
- Texture and density: hard and heavy.

**Coarse-grained ferruginous rocks (CG):** heterogeneous agglomerates of grains of different colours and shapes.

- Colour: mostly red, dark red and grey grains, and more rarely yellow, orange, and brown grains.

- Morphology: generally irregular in shape (n = 49) or occur in the form of nodules (n = 42) and, to a lesser degree, pebbles (n = 25) or slabs (n = 28).

**Ferruginous sandstone (FS):** agglomerates of translucent grains (probably quartz) in a fine iron oxide matrix.

- Colour: mostly red and orange, sometimes with dark red, grey, brown and yellow spots.
- Morphology: commonly found as slabs (n = 5), nodules (n = 2) or pieces with irregular morphologies (n = 2).

**Platy fine-grained ferruginous rocks (PFG):** agglomerates of platelets characterised by a shiny or metallic-like appearance.

- Colour: usually greyish with red veins,
- Morphology: can be irregular (n = 2) or flat in shape (n = 1).

**S4 Supplementary Table 1. Criteria for the determination of ochre types.**

| Raw material type           | Colour                       | Texture |     | Inclusions      | Hardness     | Density |
|-----------------------------|------------------------------|---------|-----|-----------------|--------------|---------|
| Soft fine - grained (SFG)   | G, Y, BR, BL, O, R, DR       | VF      | Hom | None or few     | Soft to hard | Light   |
| Banded fine - grained (BFG) | Layers of Y, O, R, DR, G, BF | VF      | Hom | None or few     | Soft to hard | Light   |
| Hard fine - grained (HFG)   | G, Y, BL, O, R, DR, BR       | VF      | Hom | None            | Very hard    | Heavy   |
| Coarse - grained (CG)       | G, Y, BR, O, R, DR           | C       | Het | Subcirc / irreg | Soft to hard | Normal  |
| Ferruginous sandstone (FS)  | G, Y, BR, O, R, DR           | C       | Hom | Subcirc / irreg | Soft to hard | Normal  |
| Platy fine - grained (PFG)  | G, R                         | F + C   | Het | Platelets       | Soft         | Light   |

G: grey; Y: yellow; BR: brown; BL: black; O: orange; R: red; DR: dark red; VF: very fine; C: coarse; F: fine; hom: homogeneous; het: heterogeneous; subcirc: subcircular; irreg: irregular. Reprinted from <sup>61</sup> under a CC BY license, with permission from PLOS ONE, original copyright 2017.

### Anthropogenic modifications

Anthropogenic modifications, including traces of flaking, striations, facets, smoothed areas, incisions, and pits, were identified macro- and microscopically <sup>61</sup>:

- Pieces bearing traces of flaking include objects with simple or multiple flake scars and flakes.
- Striations (S4 Supplementary Fig. 1a, b) produced by grinding the piece against an abrasive surface are present as linear parallel marks arranged in groups <sup>21,117,118</sup>. Facets refer to areas flattened by grinding and covered with striations.

- Incisions (S4 Supplementary Fig. 1c, d) are present as sub-parallel, slightly curved marks displaying multiple grooves (or micro-striations defined as microscopically visible parallel striations) produced by the asperities of lithic cutting edges or other sharp tools during scraping or scoring <sup>21,57,118</sup>.
- Smoothed areas (S4 Supplementary Fig. 1e) refer to homogeneous surfaces lacking irregularities and projections in comparison to neighbouring unmodified areas or those on which modification marks have been partially or fully erased <sup>118</sup>.
- Percussion pits (S4 Supplementary Fig. 1f) take the form of depressions produced by a pounding action <sup>91,119,120</sup>.

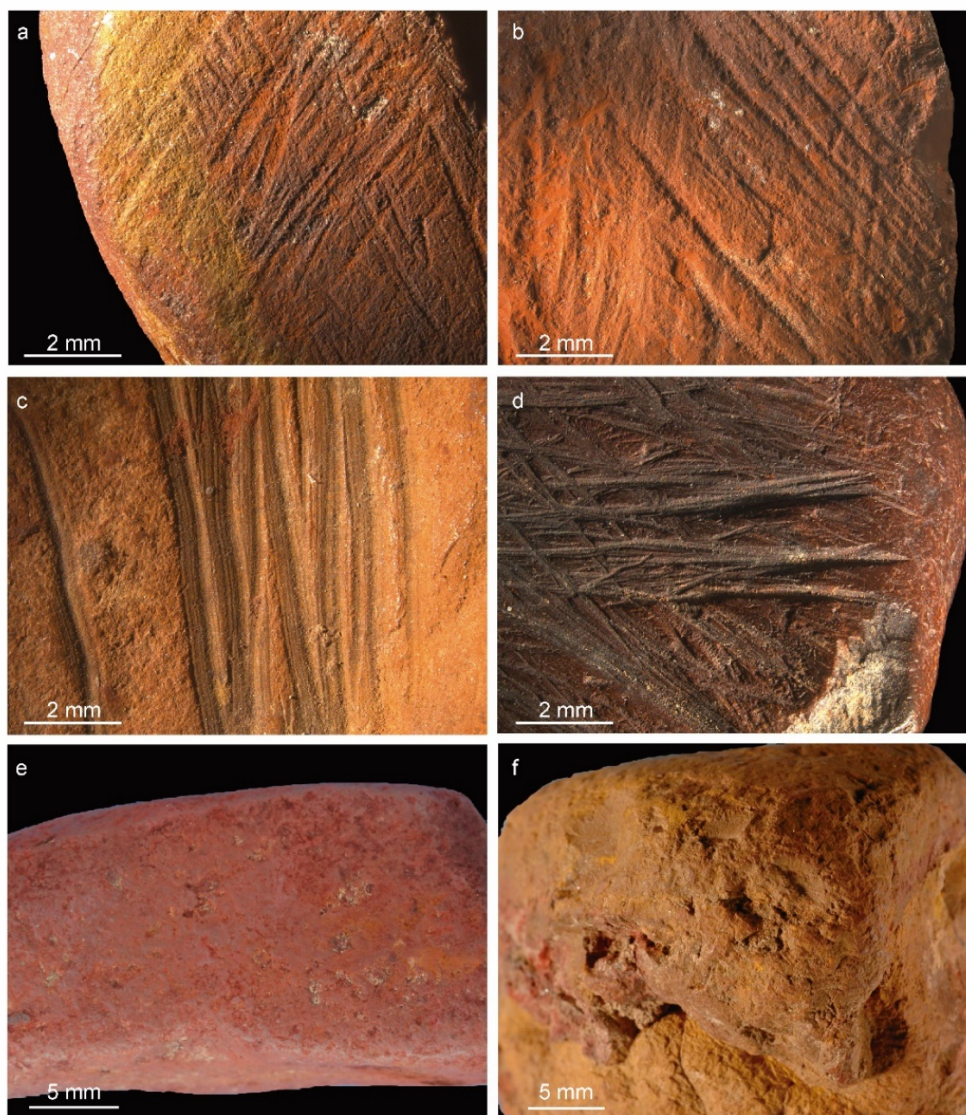

**S4 Supplementary Figure 1. Modifications on ochre pieces.**

a, b: Striations produced by grinding (ochre pieces PE102 and PE987); c, d: incisions produced by scraping/scoring (ochre pieces PE306 and PE1419); e: Smoothed areas (ochre piece PE3067); f: Pits produced by a pounding action (ochre piece PE931, OPT21). Reprinted from <sup>61</sup> under a CC BY license, with permission from PLOS ONE, original copyright 2017.



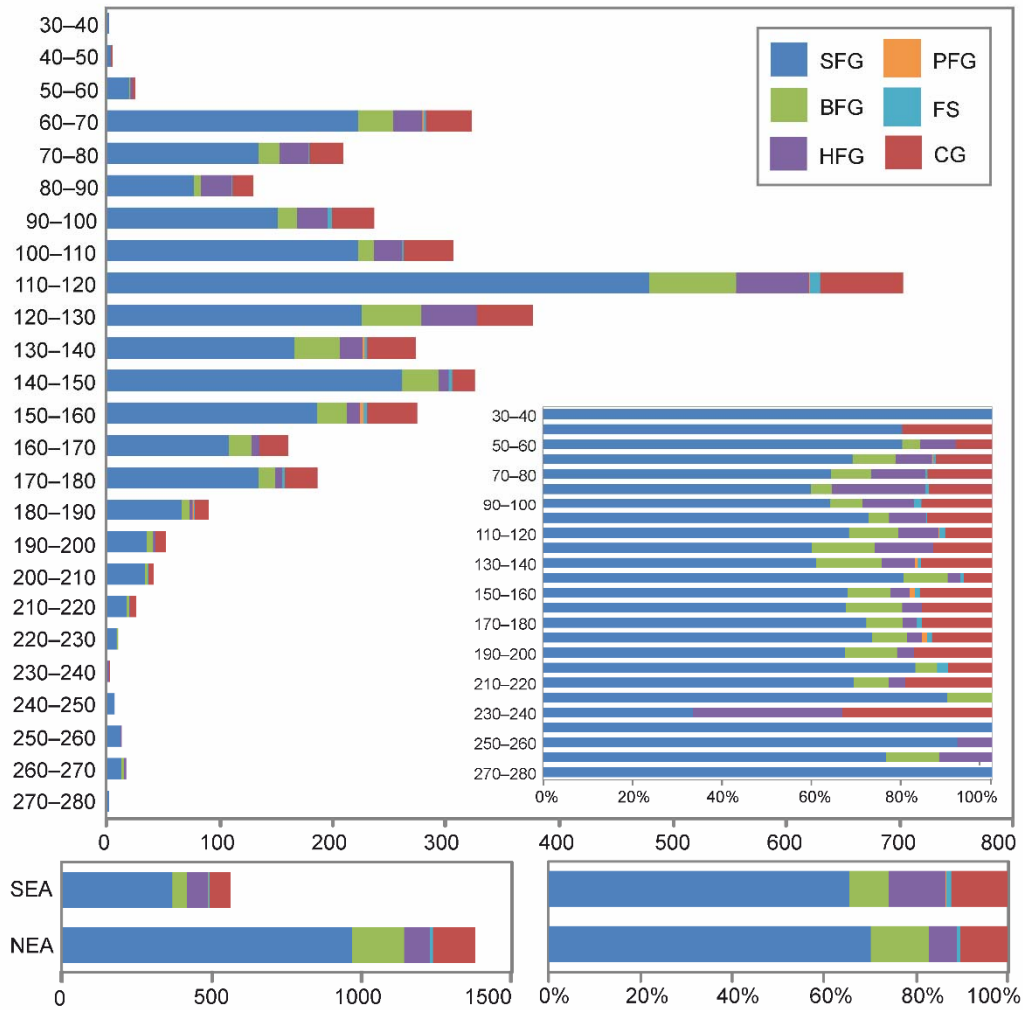

**S4 Supplementary Figure 2. Vertical distribution of ochre pieces per raw material type.**

Data are presented as number of pieces and percentages. Separate histograms are presented for ochre from the northeastern (NEA) and southeastern (SEA) accumulations. SFG: Soft fine-grained; BFG: banded fine-grained; HFG: hard fine-grained; PFG: platy fine-grained; FS: ferruginous sandstone; CG: coarse-grained. Reprinted from <sup>61</sup> under a CC BY license, with permission from PLOS ONE, original copyright 2017.

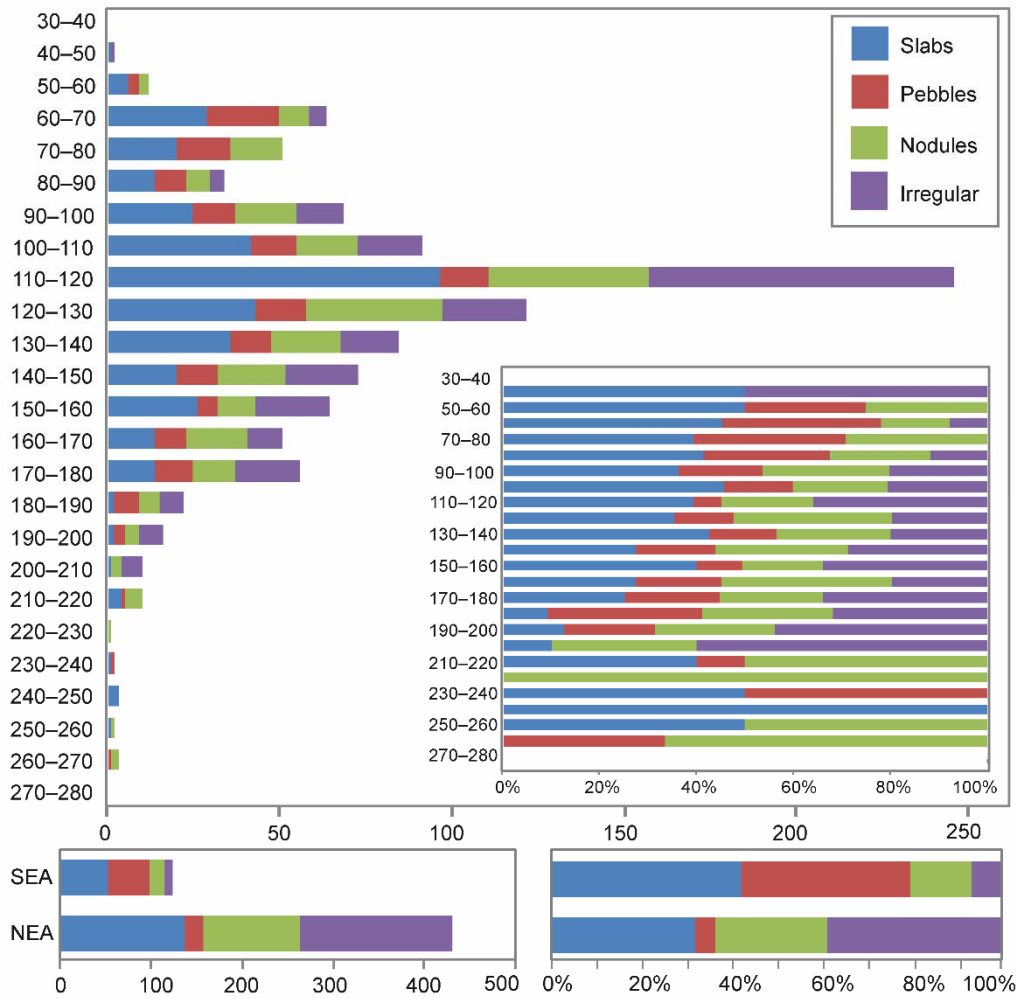

**S4 Supplementary Figure 3. Vertical distribution of ochre piece morphology.**

Data are presented as number of pieces and percentages. Pieces with undetermined morphologies were not included. Separate histograms are presented for ochre pieces from the northeastern (NEA) and southeastern (SEA) accumulations. Reprinted from <sup>61</sup> under a CC BY license, with permission from PLOS ONE, original copyright 2017.

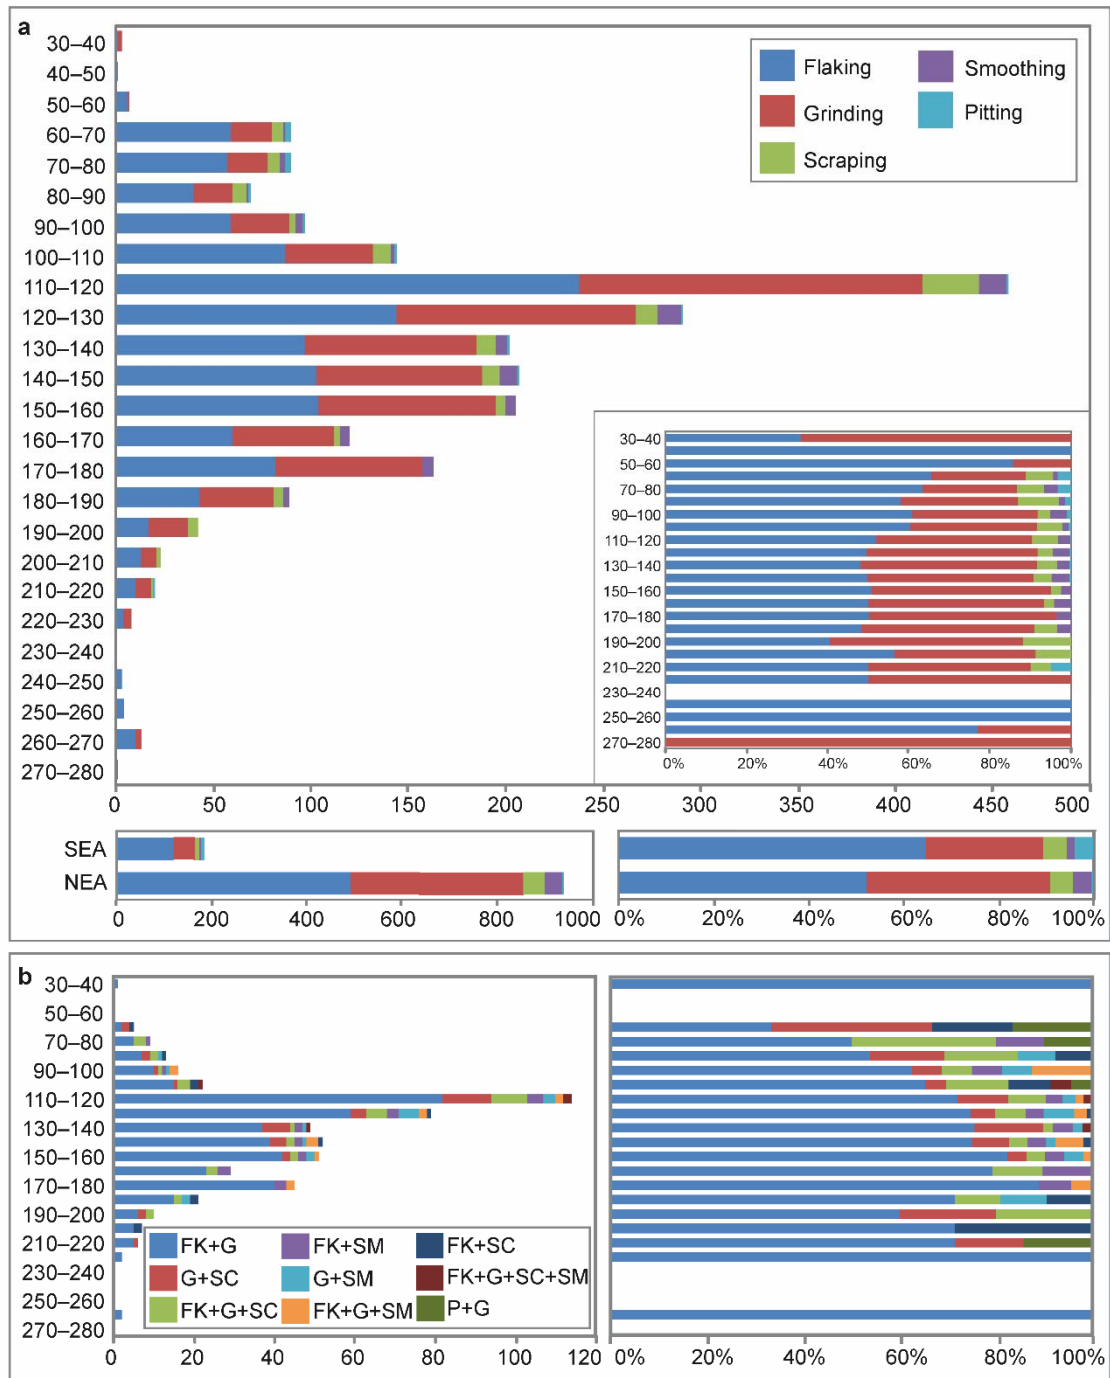

**S4 Supplementary Figure 4. Vertical distribution of modifications identified on ochre pieces.**

Data are presented as number of pieces and percentages; a: occurrence of each modification type throughout the sequence. Separate histograms are presented for ochre pieces from the northeastern (NEA) and southeastern (SEA) accumulations; b: occurrence of main combinations of modifications. Ochre pieces with only one modification or combinations that appear on less than 4 pieces were excluded. FK: flaking, G: grinding, SC: scraping, SM: smoothing, P: pitting. Reprinted from <sup>61</sup> under a CC BY license, with permission from PLOS ONE, original copyright 2017.

## S5 – Ochre pieces: elemental data

S5 Supplementary Table 1. Results of XRF analyses conducted on ochre pieces from Porc-Epic Cave and natural pieces found in the surrounding area.

| Ochre piece num | Raw mat | Analysis num | Si (%) | K (%)  | Ca (%) | Ti (%) | Mn (%)   | Fe (%) | V (ppm) | Cr (ppm) | Ga (ppm) | As (ppm) | Rb (ppm) | Sr (ppm) | Y (ppm) | Ba (ppm) |
|-----------------|---------|--------------|--------|--------|--------|--------|----------|--------|---------|----------|----------|----------|----------|----------|---------|----------|
| 9               | SFG     | 1            | 2,46   | 0,1605 | 0,4828 | 0,112  | < 0,0041 | 85,21  | 559     | 3,7      | 9        | 88,4     | 64       | 65,5     | 64      | 93       |
| 9               | SFG     | 2            | 3,17   | 0,1275 | 0,3136 | 0,0848 | < 0,0038 | 74,94  | 392     | < 45     | 13,3     | 66,7     | 56       | 54       | 56,6    | < 77     |
| 9               | SFG     | 3            | 3,61   | 0,1645 | 0,3816 | 0,1022 | < 0,0039 | 78,39  | 443     | < 46     | 13,8     | 68,3     | 48       | 56       | 75,6    | < 80     |
| 9               | SFG     | 4            | 4,31   | 0,187  | 0,4952 | 0,1459 | 0,0077   | 79,49  | 483     | < 47     | 8,1      | 103,1    | 60       | 65,8     | 74,5    | < 81     |
| 9               | SFG     | 5            | 2,694  | 0,2098 | 0,5461 | 0,157  | < 0,0043 | 83,01  | 498     | < 48     | 13,1     | 105,6    | 45       | 63,4     | 82,6    | < 83     |
| 17              | SFG     | 1            | 11,6   | 2,147  | 3,219  | 0,2108 | 0,22     | 41,96  | 81      | < 31     | < 4,8    | 27,7     | 42       | 89,4     | 29,6    | < 88     |
| 17              | SFG     | 2            | 12,68  | 1,833  | 2,54   | 0,1856 | 0,2576   | 38,8   | 102     | < 30     | < 4,7    | 20,8     | 40       | 80,4     | 28,7    | < 86     |
| 17              | SFG     | 3            | 12,78  | 1,941  | 2,782  | 0,1945 | 0,1631   | 37,23  | 116     | < 30     | < 4,8    | 20,2     | 44       | 85,7     | 27,9    | < 91     |
| 17              | SFG     | 4            | 10,42  | 1,978  | 2,951  | 0,1993 | 0,2875   | 45,23  | 234     | < 34     | < 5,0    | 29,3     | 41       | 89,1     | 33,2    | < 94     |
| 17              | SFG     | 5            | 10,42  | 2,077  | 2,901  | 0,2002 | 0,3001   | 44,76  | 211     | < 33     | < 5,1    | 24       | 38       | 86,9     | 22,1    | < 93     |
| 51              | SFG     | 1            | 7,27   | 0,3209 | 0,9909 | 0,2143 | < 0,0033 | 57,16  | 354     | < 39     | 27,6     | 22,6     | 38       | 60,7     | 42,3    | 102      |
| 51              | SFG     | 2            | 17,26  | 0,5599 | 2,526  | 0,4982 | 0,0994   | 31,64  | 77      | 148      | 25,5     | 13,5     | 43       | 187,5    | 478,1   | < 90     |
| 51              | SFG     | 3            | 12,19  | 0,7723 | 0,8894 | 2,237  | 0,111    | 37,59  | 3786    | 75       | 14,3     | 33,4     | 38       | 686,4    | 73      | 19730    |
| 51              | SFG     | 4            | 13,83  | 0,3088 | 1,553  | 0,3141 | 0,01877  | 35,03  | 488     | 79,2     | 33,8     | 13,1     | 38       | 95,9     | 312,3   | 108,7    |
| 51              | SFG     | 5            | 6,5    | 0,5234 | 0,8056 | 0,2526 | 0,0215   | 69,03  | 672     | < 43     | 16,3     | 56,8     | 45       | 69,2     | 86,9    | < 87     |
| 133             | SFG     | 1            | 10,88  | 2,201  | 1,882  | 0,3841 | 0,7438   | 50,86  | 299     | < 37     | < 5,0    | 42,2     | 66,4     | 117,4    | 98,1    | < 96     |
| 133             | SFG     | 2            | 13,39  | 2,387  | 2,334  | 0,3879 | 1,117    | 39,49  | 293     | 41,9     | < 4,8    | 32       | 61,9     | 145,9    | 104,9   | < 92     |
| 133             | SFG     | 3            | 11,76  | 2,009  | 2,539  | 0,3256 | 0,7012   | 39,68  | 221     | 41       | < 4,7    | 26,5     | 48       | 124,8    | 97,4    | < 91     |
| 133             | SFG     | 4            | 13,02  | 2,567  | 1,807  | 0,4101 | 1,425    | 41,22  | 290     | 36       | < 4,9    | 34,2     | 56,4     | 148,6    | 108,3   | < 93     |
| 133             | SFG     | 5            | 8,09   | 1,307  | 1,494  | 0,1903 | 0,4081   | 56,36  | 101     | 6,6      | < 4,6    | 31,1     | 45       | 109,6    | 77,4    | < 88     |
| 295             | SFG     | 1            | 7,34   | 1,356  | 1,643  | 0,287  | 0,1433   | 55,19  | 241     | < 38     | < 4,5    | 30,7     | 50       | 61,4     | 40,3    | < 81     |
| 295             | SFG     | 2            | 9,64   | 1,098  | 1,3    | 0,2157 | 0,1754   | 33,61  | 284     | 6,9      | < 3,4    | 15,1     | 38       | 58       | 19,1    | < 1,0    |
| 295             | SFG     | 3            | 7,74   | 1,395  | 1,424  | 0,3001 | 0,1377   | 58,22  | 222     | < 39     | < 4,7    | 28,3     | 46       | 54,6     | 29,6    | < 84     |
| 295             | SFG     | 4            | 8,37   | 1,313  | 1,746  | 0,2514 | 0,4901   | 55,9   | 567     | 8,2      | < 4,7    | 31,6     | 38       | 65,7     | 28,3    | < 87     |
| 295             | SFG     | 5            | 8,07   | 1,381  | 1,307  | 0,2953 | 0,1132   | 55,87  | 189     | < 38     | < 4,5    | 22,8     | 50       | 63       | 34,1    | < 83     |
| 381             | SFG     | 1            | < 2,2  | 0,2635 | 0,412  | 0,1027 | 0,3596   | 84,57  | 480     | < 48     | < 5,2    | 159,8    | 56       | 82,3     | 55,4    | < 91     |
| 381             | SFG     | 2            | 2,02   | 0,1935 | 0,3035 | 0,0847 | 0,2948   | 69,2   | 395     | < 42     | < 4,4    | 116,4    | 40       | 81,9     | 61,1    | < 84     |
| 381             | SFG     | 3            | 3,03   | 0,2572 | 0,3346 | 0,0879 | 0,2214   | 63,45  | 322     | < 41     | < 4,6    | 97,6     | 38       | 69,4     | 24,9    | < 78     |
| 381             | SFG     | 4            | 2,17   | 0,2462 | 0,4274 | 0,1166 | 0,35     | 81,98  | 431     | < 48     | < 5,3    | 163,6    | 72       | 80,4     | 42,1    | < 89     |
| 381             | SFG     | 5            | 3,16   | 0,2787 | 0,3454 | 0,116  | 0,2191   | 69,69  | 540     | < 44     | < 4,7    | 120,9    | 56       | 73,3     | 40,7    | < 82     |
| 538             | SFG     | 1            | 21,97  | 1,504  | 1,906  | 0,8208 | < 0,0010 | 29,25  | 397     | < 33     | 51,5     | 18,8     | 45       | 68,3     | 40,3    | < 92     |
| 538             | SFG     | 2            | 14,35  | 1,446  | 1,508  | 0,5663 | < 0,0029 | 45,91  | 734     | < 36     | 38       | 22,1     | 50       | 65,7     | 54,1    | < 82     |
| 538             | SFG     | 3            | 12,45  | 0,9265 | 1,307  | 0,611  | < 0,0031 | 48,63  | 539     | 62,7     | 40,1     | 27,5     | 38       | 61,3     | 56,5    | < 83     |
| 538             | SFG     | 4            | 11,49  | 0,9299 | 2,266  | 0,2386 | < 0,0010 | 52,29  | 596     | < 37     | 46       | 31,3     | 38       | 65,7     | 311,5   | < 88     |
| 538             | SFG     | 5            | 8,98   | 1,138  | 1,608  | 0,482  | < 0,0033 | 61,99  | 1022    | < 41     | 32,3     | 37,8     | 38       | 55,9     | 31,1    | < 86     |
| 610             | SFG     | 1            | 6,18   | 0,8281 | 1,377  | 0,1737 | 1,812    | 62,03  | 705     | 13       | < 5,0    | 77,2     | 38       | 113,5    | 45,1    | < 88     |
| 610             | SFG     | 2            | 5,02   | 0,8478 | 1,107  | 0,1987 | 2,053    | 66,29  | 622     | 1,5      | < 5,1    | 95,8     | 62       | 116,4    | 57,1    | < 92     |
| 610             | SFG     | 3            | 5,65   | 0,77   | 0,9617 | 0,1719 | 1,019    | 51,68  | 496     | < 38     | < 4,3    | 53,4     | 38       | 91,6     | 50,6    | < 82     |
| 610             | SFG     | 4            | 5,49   | 0,8555 | 1,245  | 0,1859 | 1,042    | 65,64  | 362     | < 42     | < 4,7    | 57,6     | 69       | 94       | 66,4    | < 91     |
| 610             | SFG     | 5            | 6,19   | 0,7786 | 0,9953 | 0,1655 | 1,332    | 56,23  | 448     | 4,3      | < 4,4    | 57,3     | 44       | 88,2     | 44,8    | < 85     |
| 615             | SFG     | 1            | 3,45   | 0,8138 | 2,192  | 0,1653 | 0,2575   | 66,35  | 412     | < 40     | < 4,8    | 87,9     | 39       | 73,7     | 34,7    | < 80     |
| 615             | SFG     | 2            | 4,44   | 0,8001 | 2,774  | 0,1739 | 0,1959   | 62,73  | 501     | < 39     | < 4,6    | 78,1     | 38       | 74,4     | 36,1    | < 78     |
| 615             | SFG     | 3            | 6,48   | 0,8706 | 1,827  | 0,1656 | 0,2445   | 45,81  | 247     | < 33     | < 4,0    | 40,1     | 38       | 64,3     | 16,7    | < 66     |
| 615             | SFG     | 4            | 5,81   | 0,913  | 2,687  | 0,1855 | 0,2527   | 53,46  | 386     | < 36     | < 4,3    | 52,2     | 38       | 75,7     | 32,4    | < 75     |
| 615             | SFG     | 5            | 4,96   | 1,136  | 1,973  | 0,1976 | 0,1974   | 56,82  | 224     | < 37     | < 4,4    | 56,8     | 40       | 75,1     | 35,4    | < 79     |
| 710             | SFG     | 1            | 3,59   | 0,2419 | 8,31   | 0,1287 | 0,0341   | 35,66  | 77      | < 25     | 23,9     | 161      | 38       | 73,6     | 9,6     | 224      |
| 710             | SFG     | 2            | 2,68   | 0,1549 | 3,727  | 0,03   | 0,0678   | 48,89  | 82      | < 32     | 8,5      | 343,9    | 38       | 68,2     | 19,8    | 164      |
| 710             | SFG     | 3            | < 2,0  | 0,0965 | 2,225  | 0,021  | < 0,0036 | 64,85  | 125     | < 39     | 18,7     | 407,7    | 38       | 72,3     | 25      | 224      |
| 710             | SFG     | 4            | 4,04   | 0,1638 | 5,28   | 0,021  | 0,103    | 49,84  | 98      | < 32     | 8,3      | 344,9    | 38       | 74,7     | 12,3    | < 84     |
| 710             | SFG     | 5            | 2,42   | 0,118  | 2,773  | 0,0335 | 0,0871   | 59,22  | 94      | < 37     | < 7,2    | 490,8    | 38       | 66,9     | 21,6    | 175      |
| 725             | SFG     | 1            | 8,14   | 2,002  | 3,969  | 0,3218 | 0,7662   | 59,58  | 708     | < 39     | < 5,1    | 105,5    | 52       | 107,8    | 68,8    | < 93     |
| 725             | SFG     | 2            | 10,38  | 2,133  | 3,596  | 0,3165 | 0,6439   | 47,85  | 569     | < 35     | < 5,1    | 58,6     | 40       | 101,5    | 52,7    | < 85     |
| 725             | SFG     | 3            | 8,39   | 2,145  | 3,671  | 0,3329 | 0,7832   | 53,48  | 517     | 11       | < 4,7    | 81,4     | 55       | 112,7    | 66,8    | < 91     |
| 725             | SFG     | 4            | 6,43   | 1,804  | 4,545  | 0,3904 | 0,6422   | 56,95  | 888     | < 37     | < 4,7    | 71,6     | 51       | 108      | 51,7    | < 87     |
| 725             | SFG     | 5            | 6,53   | 1,451  | 2,795  | 0,2166 | 0,7221   | 56,38  | 460     | < 37     | < 4,6    | 48       | 38       | 104,4    | 74      | < 89     |
| 726             | SFG     | 1            | 12,08  | 1,486  | 2,162  | 6,497  | 0,1155   | 31,93  | 180     | < 31     | 27,6     | 17       | 38       | 752,5    | 48,2    | 1242     |
| 726             | SFG     | 2            | 9,94   | 1,244  | 2,063  | 6,352  | 0,1193   | 33,5   | 176     | < 32     | 20,9     | 11,8     | 38       | 740,4    | 50,5    | 1556     |
| 726             | SFG     | 3            | 8,8    | 1,374  | 2,087  | 6,407  | 0,1841   | 34,88  | 160     | 53       | < 4,6    | 18,7     | 38       | 617,4    | 50,3    | 740      |
| 726             | SFG     | 4            | 6,02   | 1,412  | 2,472  | 7,268  | 0,1706   | 40,58  | < 63    | < 35     | < 5,1    | 31,7     | 38       | 653,9    | 61,8    | 912      |
| 726             | SFG     | 5            | 8,53   | 1,25   | 2,264  | 6,72   | 0,1794   | 36,19  | 105     | 12       | < 5,2    | 22,1     | 38       | 890,7    | 55,7    | 1991     |
| 737             | SFG     | 1            | 17,71  | 0,7057 | 1,429  | 9,331  | 0,0294   | 27,8   | < 65    | < 27     | 34,5     | 10,5     | 38       | 63,9     | < 2,1   | < 86     |
| 737             | SFG     | 2            | 18     | 0,4866 | 0,925  | 5,188  | 0,00575  | 27,53  | 307     | < 27     | 30       | 14,8     | 38       | 64,4     | < 1,0   | < 78     |
| 737             | SFG     | 3            | 15,48  | 0,6406 | 1,361  | 7,573  | 0,0409   | 27,15  | < 60    | < 27     | 35,2     | 11       | 38       | 70,7     | 6,3     | 96       |
| 737             | SFG     | 4            | 24,51  | 0,5182 | 1,314  | 6,822  | 0,0331   | 25,79  | 204     | < 26     | 34,5     | 14,7     | 38       | 73,3     | 4,2     | < 81     |
| 737             | SFG     | 5            | 15,28  | 0,85   | 1,98   | 10,64  | 0,0388   | 41,67  | < 73    | < 34     | 35,6     | 29,5     | 38       | 77,5     | 9,5     | < 100    |
| 913             | SFG     | 1            | 6,61   | 0,7934 | 2,457  | 0,2074 | 0,2586   | 62,82  | 312     | < 40     | < 5,0    | 47       | 40       | 70,6     | 99,3    | < 1,0    |
| 913             | SFG     | 2            | 5,9    | 0,763  | 2,452  | 0,1877 | 0,2729   | 64,33  | 250     | < 40     | < 4,6    | 45       | 55       | 79,2     | 93      | < 87     |
| 913             | SFG     | 3            | 5,7    | 0,7448 | 2,677  | 0,1746 | 0,2611   | 64,27  | 264     | < 39     | < 5,0    | 43       | 45       | 62,8     | 67,2    | < 85     |
| 913             | SFG     | 4            | 8,11   | 0,7778 | 2,731  | 0,2132 | 0,1725   | 58,28  | 323     | < 38     | < 4,7    | 37,1     | 47       | 74       | 110,2   | < 87     |
| 913             | SFG     | 5            | 9,7    | 0,9198 | 2,612  | 0,2381 | 0,1464   | 55,17  | 262     | 11       | < 4,7    | 33       | 38       | 77       | 116     | < 87     |
| 919             | SFG     | 1            | 6,14   | 0,3995 | 1,368  | 0,1874 | < 0,0035 | 64,29  | 560     | < 41     | 32,4     | 47,5     | 38       | 53       | 66,4    | < 85     |

|      |     |   |       |        |        |        |          |       |      |      |       |       |       |       |       |      |
|------|-----|---|-------|--------|--------|--------|----------|-------|------|------|-------|-------|-------|-------|-------|------|
| 919  | SFG | 2 | 6,18  | 0,4337 | 1,453  | 0,1955 | < 0,0036 | 65,8  | 556  | < 41 | 29    | 52,9  | 50    | 57,3  | 99,2  | < 86 |
| 919  | SFG | 3 | 4,41  | 0,3108 | 1,198  | 0,1845 | < 0,0037 | 71,28 | 603  | < 43 | 22,3  | 50,4  | 49    | 46    | 283   | < 87 |
| 919  | SFG | 4 | 4,94  | 0,4065 | 1,847  | 0,2076 | < 0,0040 | 76,43 | 623  | < 44 | 22,1  | 72,1  | 65    | 54    | 77,5  | < 93 |
| 919  | SFG | 5 | 5,57  | 0,3839 | 1,354  | 0,1941 | < 0,0037 | 69,11 | 530  | < 43 | 26,8  | 51,5  | 39    | 49    | 325,8 | < 88 |
| 930  | SFG | 1 | 8,07  | 1,152  | 3,519  | 0,338  | 0,1348   | 62,08 | 85   | < 39 | < 5,2 | 44,5  | 48    | 55,8  | 61,9  | < 88 |
| 930  | SFG | 2 | 7,87  | 0,9866 | 3,13   | 0,2863 | 0,1382   | 58,74 | 111  | < 38 | < 4,8 | 45    | 53    | 61,2  | 64,4  | < 86 |
| 930  | SFG | 3 | 11,64 | 1,385  | 2,469  | 0,3874 | 0,109    | 44,18 | 80   | < 33 | 8,6   | 37,3  | 53    | 68    | 61,3  | < 88 |
| 930  | SFG | 4 | 10,73 | 1,272  | 5,01   | 0,3587 | 0,1387   | 38,51 | 287  | < 30 | 7,7   | 19,4  | 48    | 78,7  | 179,6 | 2,3  |
| 930  | SFG | 5 | 9,76  | 1,056  | 3,101  | 0,296  | 0,1185   | 52,68 | 108  | < 36 | < 4,6 | 28,5  | 38    | 54    | 57,4  | < 82 |
| 987  | SFG | 1 | 5,27  | 0,713  | 1,007  | 0,1742 | 1,619    | 60,25 | 897  | 56   | < 4,6 | 49,4  | 42    | 97,6  | 83,4  | < 82 |
| 987  | SFG | 2 | 4,3   | 0,6727 | 1,122  | 0,1922 | 1,922    | 61,75 | 1049 | 52   | < 4,6 | 58,1  | 49    | 112,2 | 103   | < 84 |
| 987  | SFG | 3 | 4,81  | 0,6374 | 1,064  | 0,1531 | 1,772    | 66,4  | 1005 | 67   | < 4,5 | 53,4  | 52    | 104,1 | 106,4 | < 86 |
| 987  | SFG | 4 | 3,17  | 0,6419 | 1,016  | 0,1476 | 1,454    | 65,92 | 1015 | < 43 | < 4,8 | 55    | 38    | 86,7  | 84,1  | < 85 |
| 994  | SFG | 1 | 22,78 | 0,5723 | 1,413  | 0,2722 | 0,02828  | 19,39 | 897  | 334  | 105,6 | 22,1  | 46,4  | 128,3 | 3681  | < 80 |
| 994  | SFG | 2 | 30,98 | 0,2026 | 0,5381 | 0,2181 | 0,01625  | 11,45 | 667  | 297  | 122,9 | 10,9  | 38    | 98,6  | 1163  | < 75 |
| 994  | SFG | 3 | 14,49 | 1,399  | 1,093  | 0,2453 | 0,0578   | 39,83 | 764  | 96,4 | 32,2  | 36,8  | 38    | 76,2  | 796,6 | < 88 |
| 994  | SFG | 4 | 6,75  | 0,8063 | 0,7652 | 0,191  | 0,0893   | 55,3  | 746  | 77   | 6,8   | 40,2  | 38    | 73,4  | 1063  | < 85 |
| 1087 | SFG | 1 | 10,44 | 0,8073 | 13,44  | 0,2189 | 0,4448   | 33,58 | 236  | < 25 | < 4,7 | 19,7  | 40    | 89,2  | 13,3  | < 90 |
| 1087 | SFG | 2 | 9,82  | 0,8552 | 4,58   | 0,2859 | 0,6442   | 42,55 | 242  | 2,6  | < 5,0 | 27,7  | 42    | 92    | 15,4  | < 97 |
| 1087 | SFG | 3 | 11,36 | 0,6825 | 7,23   | 0,195  | 0,3791   | 26,33 | 253  | < 24 | < 4,3 | 13    | 44    | 85,9  | 25,4  | < 84 |
| 1087 | SFG | 4 | 11,22 | 0,724  | 11     | 0,2001 | 0,3473   | 25,05 | 251  | < 22 | < 4,0 | 15,6  | 44,8  | 95,4  | 22,5  | < 82 |
| 1087 | SFG | 5 | 10,75 | 0,8902 | 4,479  | 0,3148 | 0,6997   | 45,68 | 192  | < 33 | < 5,3 | 33,2  | 41    | 110,9 | 29,8  | < 98 |
| 1277 | SFG | 1 | 7,83  | 0,7133 | 4,72   | 0,3098 | 0,3723   | 50,78 | 506  | < 34 | < 5,0 | 33,5  | 38    | 88,2  | 32,9  | < 80 |
| 1277 | SFG | 2 | 7,43  | 0,7722 | 4,676  | 0,3071 | 0,3398   | 50,21 | 501  | < 34 | < 5,0 | 34,5  | 42    | 85,1  | 35,4  | < 82 |
| 1277 | SFG | 3 | 9,67  | 0,7425 | 5,334  | 0,5325 | 0,3531   | 48,61 | 1277 | < 34 | < 5,1 | 35    | 38    | 109,7 | 20,7  | < 81 |
| 1277 | SFG | 4 | 10,26 | 0,9656 | 3,167  | 0,5407 | 0,2671   | 48,35 | 854  | < 35 | < 5,3 | 50,8  | 47    | 86,4  | 16,6  | < 81 |
| 1277 | SFG | 5 | 6,62  | 0,4487 | 4,004  | 0,252  | 0,286    | 50,15 | 726  | < 34 | < 5,1 | 45,2  | 38    | 72,5  | 18    | < 78 |
| 1427 | SFG | 1 | 6,53  | 0,9809 | 9,648  | 0,1159 | 0,0844   | 28,27 | 240  | 56,5 | 27,1  | 7,7   | 39    | 251   | 214   | 117  |
| 1427 | SFG | 2 | 14,37 | 2,145  | 5,903  | 0,378  | 0,02221  | 21,99 | 200  | 26   | 47,7  | 8     | 48,2  | 306,7 | 280,9 | 114  |
| 1427 | SFG | 3 | 14,92 | 1,945  | 5,34   | 0,3899 | 0,00794  | 29,75 | 107  | < 26 | 46,4  | 15,5  | 56    | 133,1 | 93,6  | 90   |
| 1427 | SFG | 4 | 13,02 | 1,55   | 5,189  | 0,3033 | 0,00972  | 26,87 | 117  | < 25 | 42,8  | 13,6  | 50,7  | 119,2 | 79,2  | < 87 |
| 1427 | SFG | 5 | 12,47 | 1,767  | 5,425  | 0,336  | 0,01901  | 33,28 | 140  | < 27 | 43,4  | 22    | 53,2  | 125,7 | 115,5 | < 90 |
| 1481 | SFG | 1 | 11,15 | 0,9269 | 1,773  | 0,3935 | 0,2691   | 46,37 | 325  | < 35 | < 5,2 | 111   | 64,6  | 73,3  | 56,7  | < 93 |
| 1481 | SFG | 2 | 14    | 1,019  | 2,171  | 0,3966 | 0,2609   | 41,1  | 437  | 3,7  | < 5,6 | 102,3 | 66    | 73,2  | 57,3  | < 98 |
| 1481 | SFG | 3 | 15,32 | 0,8439 | 2,112  | 0,4976 | 0,2702   | 41,81 | 509  | < 34 | < 5,5 | 98    | 65,7  | 71,7  | 48,9  | < 91 |
| 1481 | SFG | 4 | 13,19 | 0,7166 | 1,526  | 0,5899 | 0,1674   | 41,31 | 892  | < 34 | < 5,4 | 88,4  | 51    | 91,5  | 34,6  | < 93 |
| 1481 | SFG | 5 | 10,81 | 1,019  | 2,018  | 0,3772 | 0,3256   | 49,35 | 452  | < 36 | < 5,9 | 125,6 | 62    | 60,5  | 49    | < 97 |
| 1491 | SFG | 1 | 5,6   | 0,4915 | 1,202  | 0,2673 | 0,3326   | 62,97 | 400  | 42   | < 4,8 | 41,1  | 38    | 77,3  | 64,9  | < 87 |
| 1491 | SFG | 2 | 5,74  | 0,4745 | 1,272  | 0,2447 | 0,3079   | 62,26 | 272  | 52   | < 4,5 | 40,2  | 38    | 79,8  | 94,3  | < 89 |
| 1491 | SFG | 3 | 5,87  | 0,4179 | 1,085  | 0,3315 | 0,3414   | 60,45 | 703  | 50   | < 4,6 | 34,3  | 45    | 84,1  | 108,4 | < 89 |
| 1491 | SFG | 4 | 5,14  | 0,3969 | 1,501  | 0,2201 | 0,3425   | 64,95 | 489  | 48   | < 4,6 | 53,1  | 52    | 82,3  | 135,1 | < 87 |
| 1491 | SFG | 5 | 5,77  | 0,468  | 1,785  | 0,2304 | 0,3716   | 65,63 | 477  | 66   | < 4,7 | 52,4  | 47    | 73,3  | 122,7 | < 89 |
| 1493 | SFG | 1 | 5,59  | 0,8711 | 1,029  | 0,2966 | 0,8275   | 66,85 | 573  | 8,7  | < 4,7 | 69,7  | 73    | 100,9 | 107,5 | < 89 |
| 1493 | SFG | 2 | 5,03  | 0,7685 | 1,11   | 0,8678 | 0,7718   | 59,74 | 2283 | < 43 | < 4,9 | 51,3  | 46    | 165,8 | 69,3  | < 85 |
| 1493 | SFG | 3 | 5,3   | 0,7789 | 1,928  | 0,4362 | 0,7566   | 64,08 | 1087 | < 42 | < 4,7 | 61,2  | 58    | 108,8 | 82    | < 87 |
| 1493 | SFG | 4 | 5,85  | 0,8131 | 1,51   | 0,4663 | 0,7526   | 63,21 | 1123 | < 42 | < 4,7 | 55,9  | 58    | 112,3 | 109,3 | < 85 |
| 1493 | SFG | 5 | 4,88  | 0,7736 | 1,071  | 0,252  | 0,7477   | 62,84 | 466  | < 41 | < 4,7 | 46,9  | 51    | 78,4  | 73,4  | < 84 |
| 1526 | SFG | 1 | 7,51  | 0,6167 | 1,038  | 0,285  | < 0,0034 | 66,24 | 312  | 12   | 27,8  | 39,8  | 38    | 52    | 81,4  | < 86 |
| 1526 | SFG | 2 | 14,66 | 0,5866 | 1,293  | 0,3908 | < 0,0026 | 37,3  | 77   | 79,6 | 40,6  | 15,5  | 46    | 122,6 | 104,2 | 557  |
| 1526 | SFG | 3 | 24,53 | 1,581  | 1,216  | 0,6284 | < 0,0023 | 25,06 | 366  | 44,1 | 60    | 13,7  | 75,4  | 86,2  | 30,7  | < 84 |
| 1526 | SFG | 4 | 8,6   | 0,5625 | 0,9457 | 0,2224 | < 0,0031 | 56,02 | 304  | < 38 | 30,1  | 28,5  | 38    | 50    | 21,9  | 83   |
| 1526 | SFG | 5 | 25,77 | 1,651  | 1,098  | 0,7532 | < 0,0020 | 18,93 | 237  | 63,5 | 62,6  | 14,4  | 101,6 | 96,4  | 45,9  | < 81 |
| 1552 | SFG | 1 | 5,8   | 0,5243 | 0,7576 | 0,3948 | 0,582    | 58,34 | 853  | < 41 | < 4,4 | 55,1  | 38    | 80    | 40,2  | < 76 |
| 1552 | SFG | 2 | 7,46  | 0,614  | 0,8733 | 0,3937 | 0,4507   | 55,86 | 926  | < 40 | < 4,3 | 59    | 42    | 78,5  | 45,4  | < 76 |
| 1552 | SFG | 3 | 6,78  | 0,7023 | 1,059  | 0,5941 | 0,5908   | 57,73 | 1628 | < 41 | < 4,8 | 49,8  | 44    | 73,2  | 19,3  | < 81 |
| 1552 | SFG | 4 | 5,09  | 0,5923 | 0,8276 | 0,2236 | 1,152    | 68,64 | 655  | < 44 | < 4,7 | 67,9  | 62    | 75,2  | 55    | < 84 |
| 1552 | SFG | 5 | 4,25  | 0,5518 | 0,7242 | 0,2716 | 0,4075   | 66,57 | 619  | < 43 | < 4,5 | 54,8  | 48    | 78,3  | 46,2  | < 83 |
| 1566 | SFG | 1 | 16,94 | 0,9594 | 1,054  | 0,3222 | 0,0763   | 37,62 | 134  | < 31 | 18,4  | 16,8  | 51    | 68,6  | 35    | < 90 |
| 1566 | SFG | 2 | 19,92 | 0,98   | 1,127  | 0,3555 | 0,0913   | 32,11 | 151  | < 29 | 20,5  | 18,1  | 51,5  | 82    | 43,5  | < 93 |
| 1566 | SFG | 3 | 28,29 | 1,818  | 0,9106 | 0,4969 | 0,03401  | 11,19 | 171  | < 18 | 50,9  | 3,9   | 79,1  | 84,5  | 27,4  | < 98 |
| 1566 | SFG | 4 | 15,7  | 0,9049 | 1,067  | 0,2997 | 0,0772   | 41,22 | 141  | 1,5  | 18,2  | 23,7  | 48    | 75,7  | 53,4  | < 87 |
| 1566 | SFG | 5 | 18,96 | 0,8515 | 1,118  | 0,3011 | 0,1213   | 35,11 | 118  | < 31 | 9,9   | 13,7  | 42    | 65,4  | 26,1  | < 96 |
| 1626 | SFG | 1 | 9,53  | 0,9338 | 1,606  | 0,3136 | 0,4042   | 56,26 | 173  | 7,5  | < 4,4 | 34    | 40    | 96,4  | 45,2  | < 89 |
| 1626 | SFG | 2 | 8,39  | 0,8784 | 1,629  | 0,2976 | 0,4465   | 58,04 | 212  | < 39 | < 4,5 | 41,7  | 52    | 90,3  | 43,5  | < 90 |
| 1626 | SFG | 3 | 9,35  | 1,16   | 1,812  | 0,3596 | 0,2725   | 58,85 | 206  | < 39 | < 4,9 | 35,6  | 50    | 83,5  | 33    | < 93 |
| 1626 | SFG | 4 | 9,45  | 1,158  | 2,067  | 0,3414 | 0,5729   | 58,23 | 195  | < 39 | < 4,8 | 37,6  | 56    | 101,1 | 41,8  | < 95 |
| 1626 | SFG | 5 | 8,15  | 0,8587 | 1,498  | 0,2607 | 0,4372   | 54,38 | 194  | < 38 | < 4,4 | 33,1  | 44    | 85,3  | 35,2  | < 86 |
| 1635 | SFG | 1 | 3,43  | 0,2399 | 3,114  | 0,0659 | 1,474    | 76,01 | 78   | < 42 | < 4,8 | 61,2  | 39    | 74,3  | 67,9  | < 84 |
| 1635 | SFG | 2 | 2,66  | 0,2208 | 3,384  | 0,1363 | 2,137    | 76,31 | 309  | < 42 | < 4,8 | 67,8  | 43    | 107   | 95,7  | < 81 |
| 1635 | SFG | 3 | 2,3   | 0,1871 | 3,253  | 0,1381 | 2,152    | 76,66 | 382  | < 43 | < 4,9 | 64,3  | 38    | 105,3 | 80,7  | < 81 |
| 1635 | SFG | 4 | 3,21  | 0,2531 | 2,377  | 0,0797 | 1,463    | 76,91 | 112  | < 43 | < 4,9 | 61,2  | 65    | 91,7  | 73,2  | < 89 |
| 1635 | SFG | 5 | 3,9   | 0,2667 | 2,571  | 0,0914 | 1,746    | 69,76 | 135  | < 41 | < 4,5 | 53,5  | 38    | 93,5  | 68,6  | < 78 |
| 1637 | SFG | 1 | 7,18  | 1,045  | 1,916  | 0,3839 | 0,393    | 59,03 | 799  | 3,3  | < 5,2 | 59,6  | 52    | 87,7  | 28,7  | < 96 |
| 1637 | SFG | 2 | 6,94  | 0,9281 | 1,474  | 0,2862 | 0,4713   | 56,26 | 601  | < 39 | < 4,9 | 69,3  | 50    | 80,8  | 63,2  | < 93 |

|      |     |   |       |        |        |        |           |       |      |       |       |       |      |       |       |       |
|------|-----|---|-------|--------|--------|--------|-----------|-------|------|-------|-------|-------|------|-------|-------|-------|
| 1637 | SFG | 3 | 7,22  | 0,9354 | 1,454  | 0,2758 | 0,4737    | 52,99 | 581  | < 38  | < 4,8 | 58,1  | 55   | 77,7  | 48,8  | < 90  |
| 1637 | SFG | 4 | 6,96  | 1,028  | 1,919  | 0,4186 | 0,4039    | 58,8  | 869  | 6     | < 5,1 | 54,6  | 51   | 90,5  | 27,5  | < 97  |
| 1637 | SFG | 5 | 5,65  | 0,8944 | 1,376  | 0,2784 | 0,4736    | 54,48 | 578  | < 38  | < 4,9 | 59,7  | 53   | 76,6  | 48,4  | < 92  |
| 1677 | SFG | 1 | 28,38 | 0,601  | 1,372  | 0,9734 | < 0,0018  | 13,61 | 382  | 159   | 105,9 | 22,5  | 36,7 | 503,5 | 43,9  | 320   |
| 1677 | SFG | 2 | 28,21 | 0,6829 | 1,551  | 1,011  | < 0,00010 | 16,82 | 377  | 59,6  | 94,4  | 26    | 38,3 | 529   | 35,6  | 153   |
| 1677 | SFG | 3 | 25,2  | 0,8524 | 1,647  | 0,833  | < 0,0020  | 18,65 | 403  | 80,5  | 99,8  | 28,1  | 41,3 | 500,6 | 45,8  | 233   |
| 1677 | SFG | 4 | 30,92 | 0,6725 | 1,762  | 1,003  | 0,00241   | 10,06 | 381  | 120   | 117,3 | 12,4  | 25,9 | 536,7 | 50,7  | 296   |
| 1677 | SFG | 5 | 27,07 | 0,6655 | 1,523  | 1,036  | < 0,0020  | 18,63 | 384  | 77,9  | 97,2  | 27    | 37,6 | 573,9 | 34,3  | 171   |
| 1699 | SFG | 1 | 6,99  | 1,47   | 1,755  | 0,2655 | 0,9099    | 58,04 | 491  | < 39  | < 5,2 | 127,8 | 45   | 87    | 34,8  | < 84  |
| 1699 | SFG | 2 | 7,9   | 1,468  | 1,63   | 0,2312 | 0,6853    | 50,63 | 439  | < 37  | < 4,7 | 100,8 | 40   | 98    | 54,9  | < 84  |
| 1699 | SFG | 3 | 8,13  | 1,73   | 1,739  | 0,7693 | 0,5223    | 52,56 | 1861 | 5,8   | < 5,3 | 107,3 | 48   | 150,4 | 27,6  | < 87  |
| 1699 | SFG | 4 | 7,56  | 1,425  | 1,48   | 0,2377 | 0,5964    | 51,79 | 373  | < 37  | < 4,9 | 101   | 38   | 97,5  | 62,3  | < 84  |
| 1699 | SFG | 5 | 12,66 | 2,077  | 1,598  | 0,3182 | 0,1265    | 38,43 | 165  | < 31  | 6,1   | 27,1  | 45   | 81,2  | 41,4  | < 74  |
| 1737 | SFG | 1 | 8,9   | 1,967  | 1,684  | 0,26   | 0,1264    | 61,96 | 372  | < 40  | < 4,5 | 54,7  | 44   | 71,1  | 41,2  | < 83  |
| 1737 | SFG | 2 | 10,79 | 1,932  | 1,626  | 0,2552 | 0,1472    | 54,92 | 256  | 9,1   | < 4,2 | 48,4  | 59   | 66,3  | 43,6  | < 78  |
| 1737 | SFG | 3 | 7,52  | 1,228  | 1,832  | 0,1773 | 0,7569    | 62,01 | 182  | < 39  | < 4,6 | 39,2  | 44   | 61,7  | 17,7  | < 80  |
| 1737 | SFG | 4 | 8,96  | 1,778  | 1,595  | 0,2527 | 0,7164    | 60,1  | 343  | 5,1   | < 4,8 | 56,3  | 57   | 60,6  | 20,8  | < 81  |
| 1737 | SFG | 5 | 9,78  | 1,866  | 1,625  | 0,281  | 0,5238    | 58,06 | 353  | 5,4   | < 4,7 | 46,5  | 46   | 62,3  | 22,8  | < 79  |
| 1780 | SFG | 1 | 5,38  | 1,363  | 3,569  | 0,1677 | 0,8036    | 59,07 | 140  | < 37  | < 4,5 | 41,5  | 38   | 84,8  | 41,8  | < 87  |
| 1780 | SFG | 2 | 5,24  | 1,429  | 2,871  | 0,1749 | 0,9335    | 60,28 | 78   | < 38  | < 4,5 | 46,4  | 42   | 86,7  | 43,7  | < 86  |
| 1780 | SFG | 3 | 5,42  | 1,465  | 2,878  | 0,1552 | 0,9385    | 60,03 | 77   | < 38  | < 4,7 | 37    | 43   | 83,9  | 27,3  | < 87  |
| 1780 | SFG | 4 | 4,24  | 1,377  | 2,288  | 0,1741 | 0,5749    | 60,74 | 109  | < 39  | < 4,6 | 41,8  | 42   | 83,7  | 27,6  | < 86  |
| 1780 | SFG | 5 | 5,33  | 1,45   | 2,988  | 0,1639 | 0,9342    | 60,37 | 112  | < 38  | < 4,5 | 45,7  | 38   | 89,8  | 39,8  | < 85  |
| 1845 | SFG | 1 | 5,81  | 0,6912 | 2,915  | 0,1295 | 0,4636    | 55,27 | 924  | < 38  | < 5,1 | 56,6  | 38   | 79,2  | 75,9  | < 82  |
| 1845 | SFG | 2 | 5,82  | 0,7183 | 3,198  | 0,124  | 0,6434    | 51,21 | 880  | < 1,0 | < 4,9 | 52,3  | 38   | 88,3  | 78,2  | < 81  |
| 1845 | SFG | 3 | 6,65  | 0,6915 | 3,459  | 0,2422 | 0,518     | 58,05 | 1360 | 44    | < 4,9 | 65,6  | 48   | 91,5  | 80,8  | < 84  |
| 1845 | SFG | 4 | 7,41  | 0,7731 | 5,652  | 0,1578 | 0,8236    | 57,28 | 1131 | 5,2   | < 5,0 | 54,2  | 38   | 97,8  | 117,2 | < 87  |
| 1845 | SFG | 5 | 6,84  | 0,7222 | 3,014  | 0,1372 | 0,498     | 55,32 | 888  | 1,4   | < 4,8 | 59,5  | 51   | 97,1  | 106,1 | < 86  |
| 1862 | SFG | 1 | 9,71  | 1,978  | 0,5841 | 0,3994 | 0,0413    | 47,25 | 294  | 6,9   | 20,6  | 22,6  | 64,2 | 60,1  | 77    | < 85  |
| 1862 | SFG | 2 | 7,51  | 1,687  | 0,6858 | 0,3178 | 0,0332    | 56,74 | 241  | 5,4   | 17    | 34,1  | 60   | 46    | 37,7  | < 88  |
| 1862 | SFG | 3 | 10,28 | 1,572  | 0,9751 | 0,2696 | 0,0184    | 55,28 | 336  | 54,2  | 25,9  | 26,2  | 52   | 55,6  | 147,3 | < 84  |
| 1862 | SFG | 4 | 12    | 2,163  | 1,279  | 0,7935 | 0,0575    | 42,96 | 1638 | 42    | 20,6  | 24,5  | 57,5 | 72,6  | 26,4  | 129,2 |
| 1862 | SFG | 5 | 7,74  | 1,697  | 0,7184 | 0,3133 | 0,0322    | 57,66 | 230  | < 39  | 15,8  | 31,6  | 55   | 50    | 41    | 131   |
| 1914 | SFG | 1 | 8,76  | 0,8518 | 2,675  | 0,2904 | 0,2172    | 56,19 | 202  | < 37  | < 4,6 | 49,6  | 70   | 71,1  | 71    | < 86  |
| 1914 | SFG | 2 | 9,93  | 0,8557 | 2,579  | 0,306  | 0,3328    | 49,95 | 232  | < 35  | < 4,5 | 43,6  | 45   | 76,8  | 66,2  | < 87  |
| 1914 | SFG | 3 | 12,35 | 1,091  | 2,792  | 0,3496 | 0,2072    | 45,44 | 216  | < 34  | < 4,8 | 34,9  | 39   | 68,7  | 57,2  | < 92  |
| 1914 | SFG | 4 | 8,57  | 1,019  | 2,66   | 0,3108 | 0,5332    | 49,86 | 513  | < 35  | < 4,7 | 56,7  | 60,8 | 72,2  | 68,9  | < 84  |
| 1914 | SFG | 5 | 22,27 | 2,387  | 3,194  | 0,4559 | 0,1046    | 16,81 | 148  | < 21  | 25    | 13,7  | 87,9 | 63,5  | 35,6  | < 87  |
| 1927 | SFG | 1 | 4,78  | 0,5853 | 1,292  | 0,1881 | 0,1618    | 66,89 | 534  | < 42  | < 4,9 | 127,3 | 50   | 76,6  | 58,4  | < 86  |
| 1927 | SFG | 2 | 4,04  | 0,5686 | 1,908  | 0,1762 | 0,2486    | 67,87 | 572  | < 42  | < 5,1 | 153,6 | 54   | 75,1  | 56,7  | < 85  |
| 1927 | SFG | 3 | 5,6   | 0,6786 | 2,187  | 0,363  | 0,1633    | 62,12 | 1058 | 3,3   | < 5,1 | 112,9 | 48   | 151,9 | 23,2  | 191,4 |
| 1927 | SFG | 4 | 4,66  | 0,7507 | 2,35   | 1,7    | 0,1916    | 49,62 | 4081 | 50    | < 5,2 | 79,6  | 38   | 121,4 | 11    | 28210 |
| 1927 | SFG | 5 | 4,21  | 0,5218 | 1,188  | 0,1726 | 0,2217    | 68,28 | 564  | < 43  | < 4,9 | 168,3 | 47   | 85,8  | 72,5  | < 87  |
| 1942 | SFG | 1 | 4,68  | 0,3585 | 1,292  | 0,147  | 0,1206    | 56,04 | 363  | < 38  | < 4,3 | 95,3  | 38   | 78,2  | 59,3  | 82    |
| 1942 | SFG | 2 | 4,76  | 0,4728 | 1,663  | 0,17   | 0,0977    | 56,05 | 381  | < 38  | < 4,3 | 86,8  | 38   | 65,4  | 31    | 115   |
| 1942 | SFG | 3 | 6,39  | 0,5861 | 2,779  | 0,1565 | 0,0452    | 31,83 | 183  | < 27  | 17,7  | 36,4  | 38   | 63,2  | 18,8  | 183   |
| 1942 | SFG | 4 | 6,02  | 0,8211 | 1,345  | 0,1958 | 0,0679    | 61,9  | 301  | 13    | 6,2   | 100,1 | 48   | 70,4  | 35,8  | 102   |
| 1942 | SFG | 5 | 5,04  | 0,4496 | 1,554  | 0,1651 | 0,1291    | 64,6  | 416  | < 41  | < 4,7 | 123,2 | 39   | 80,5  | 40,4  | < 85  |
| 1981 | SFG | 1 | 7,46  | 0,3782 | 5,47   | 0,2146 | 0,1634    | 38,28 | 347  | < 1,0 | < 5,0 | 33,1  | 38   | 67,7  | 12,6  | 82    |
| 1981 | SFG | 2 | 5,94  | 0,3206 | 4,077  | 0,1497 | 0,1222    | 39,47 | 347  | < 30  | 9,7   | 31,1  | 38   | 66,5  | 11,8  | 92    |
| 1981 | SFG | 3 | 8,13  | 0,4962 | 8,077  | 0,2358 | 0,3154    | 44,06 | 430  | < 30  | < 5,5 | 34,1  | 38   | 106,8 | 30,7  | < 88  |
| 1981 | SFG | 4 | 11,86 | 0,7368 | 10,08  | 0,3375 | 0,3448    | 28,78 | 428  | < 24  | < 5,6 | 20    | 43   | 112,4 | 13,4  | < 82  |
| 1981 | SFG | 5 | 13,21 | 0,5711 | 5,519  | 0,3641 | 0,2386    | 16,55 | 576  | 6,1   | < 4,7 | 12,1  | 44,1 | 86,5  | < 2,0 | < 67  |
| 2023 | SFG | 1 | 4,02  | 0,4991 | 0,9541 | 0,1412 | 0,0954    | 62,29 | 177  | < 40  | < 4,6 | 34,7  | 59   | 113,5 | 235,4 | < 90  |
| 2023 | SFG | 2 | 6,36  | 0,6892 | 1,105  | 0,2013 | 0,0717    | 60,19 | 290  | 5,9   | 5,6   | 42,3  | 47   | 65,2  | 59,1  | 121   |
| 2023 | SFG | 3 | 3,61  | 0,6669 | 1,094  | 0,1897 | 0,2556    | 75,46 | 387  | 11    | < 5,0 | 107,6 | 86   | 76,9  | 82,8  | < 90  |
| 2023 | SFG | 4 | 5,23  | 0,7301 | 1,091  | 0,2844 | 0,1399    | 63,18 | 819  | 14    | < 4,7 | 49,4  | 50   | 70,4  | 48,3  | < 85  |
| 2023 | SFG | 5 | 5,43  | 0,8304 | 1,208  | 0,2298 | 0,1491    | 63,34 | 549  | < 41  | < 4,7 | 55,8  | 54   | 77,6  | 61,8  | < 85  |
| 2063 | SFG | 1 | 6,32  | 1,142  | 5,12   | 0,2469 | 1,087     | 58,77 | 560  | < 37  | < 4,4 | 38,9  | 38   | 100,6 | 47    | < 85  |
| 2063 | SFG | 2 | 6,05  | 1,143  | 6,163  | 0,2525 | 1,259     | 59,38 | 545  | < 37  | < 4,5 | 37,8  | 52   | 90,9  | 49,2  | < 80  |
| 2063 | SFG | 3 | 5,48  | 1,005  | 1,498  | 0,1596 | 0,4838    | 62,91 | 359  | < 40  | < 4,7 | 43,7  | 51   | 78,4  | 56    | < 88  |
| 2063 | SFG | 4 | 3,94  | 0,5066 | 1,011  | 0,1148 | 0,4948    | 63,38 | 363  | 1,4   | < 4,6 | 53    | 49   | 105,4 | 124,4 | < 90  |
| 2063 | SFG | 5 | 8,6   | 1,17   | 4,398  | 2,094  | 0,8326    | 44,26 | 5500 | < 1,0 | < 4,6 | 31    | 39   | 282   | 38,3  | < 81  |
| 2067 | SFG | 1 | 5,31  | 0,7719 | 1,766  | 0,1681 | 0,1169    | 66,64 | 106  | 3,3   | < 4,5 | 45,2  | 44   | 63,3  | 39,3  | < 82  |
| 2067 | SFG | 2 | 5,12  | 0,7906 | 1,79   | 0,1696 | 0,1196    | 68,9  | 145  | < 42  | < 4,6 | 52    | 40   | 65    | 34,2  | < 84  |
| 2067 | SFG | 3 | 5,17  | 0,6404 | 4,371  | 0,184  | 0,3654    | 72    | 354  | 66    | < 5,0 | 54,3  | 40   | 84,3  | 124,1 | < 91  |
| 2067 | SFG | 4 | 4,71  | 0,7098 | 2,507  | 0,1644 | 0,1293    | 69,18 | 145  | < 41  | < 4,5 | 53,7  | 42   | 66,7  | 55,9  | < 85  |
| 2067 | SFG | 5 | 7,49  | 0,683  | 2,95   | 0,1756 | 0,285     | 54,47 | 265  | < 36  | < 4,2 | 36,1  | 38   | 74,2  | 55,1  | < 76  |
| 2069 | SFG | 1 | 4,86  | 0,6702 | 3,242  | 0,1962 | 0,3056    | 65,34 | 1166 | 15    | < 4,7 | 76,3  | 40   | 79,8  | 85,1  | < 85  |
| 2069 | SFG | 2 | 4,77  | 0,6124 | 4,69   | 0,1863 | 0,1814    | 67,29 | 1176 | 97    | < 4,9 | 46,4  | 38   | 67,2  | 104,7 | < 88  |
| 2069 | SFG | 3 | 5,5   | 0,6373 | 3,084  | 0,2054 | 0,2839    | 65,01 | 1277 | 89    | < 4,8 | 66,3  | 38   | 77,9  | 76,7  | < 1,0 |
| 2069 | SFG | 4 | 6,25  | 1,142  | 2,684  | 0,1757 | 0,4189    | 59,75 | 1001 | < 39  | < 4,9 | 59    | 38   | 74,7  | 55,9  | < 84  |
| 2069 | SFG | 5 | 6,75  | 0,9893 | 2,433  | 0,1782 | 0,3461    | 55,19 | 963  | 2,4   | < 4,6 | 39,4  | 45   | 68,2  | 59,3  | < 81  |
| 2091 | SFG | 1 | 13,76 | 0,6848 | 6,604  | 0,1358 | 0,3078    | 38,62 | 191  | < 29  | < 5,3 | 23,9  | 38   | 106,1 | 80,4  | < 76  |











**S5 Supplementary Table 2. Detailed results of SEM-EDS analyses conducted on ochre pieces from Porc-Epic Cave.**

| Num  | Raw mat | Num of an | Description of analysed item |           |                   |                  | Semi-quantitative EDS analyses ** |                 |                    |                            | Interpretation***                     |
|------|---------|-----------|------------------------------|-----------|-------------------|------------------|-----------------------------------|-----------------|--------------------|----------------------------|---------------------------------------|
|      |         |           | Grain morph                  | BSE cont* | Length range (µm) | Width range (µm) | >10%                              | 10-3%           | 3-1%               | <1%                        |                                       |
| 17   | SFG     | 3         | Irr                          | W         | 1-2               | 1                | <b>Fe</b>                         | (Si, Ca)        | (Al, K)            | (Mg, Cl) Mn (P, Ti, S, Na) | Iron ox (+ clay min + silicate)       |
| 17   | SFG     | 2         | Plat                         | G         | 3-4               | 2-3              | (Fe) Si                           | Al, Ca          | K, Mg (Cl)         | P, S (Ti) Na               | Clay min (+ iron ox)                  |
| 17   | SFG     | 2         | Irr                          | DG        | Submicr           | Submicr          | Si (Fe)                           | -               | (Ca, K, Al)        | (Mg, Cl, S, P, Na)         | Silicate (+ iron ox + clay min)       |
| 17   | SFG     | 3         | -                            | W/DG      | -                 | -                | Fe, Si                            | Ca, K           | Al                 | Mg (Cl) Ti, S, Na, P       | Mixture of iron ox and alum           |
| 295  | SFG     | 3         | Irr/aggl                     | W         | 1-3               | submicr-1        | Fe                                | (Si, Ca, S, Al) | (K)                | (Cl, Mg, P, Ti)            | Iron ox (+ clay min)                  |
| 295  | SFG     | 1         | Irr                          | G         | 6                 | 5                | (Fe) Si                           | (Al)            | (K, Ca, Cl, Mg)    | (Ti, S, P)                 | Silicate (+ iron ox)                  |
| 295  | SFG     | 3         | Irr/subcirc                  | G         | 4-11              | 2-11             | Ca, S (Fe)                        | -               | (Si, Al)           | (P, K, Cl, Mg, Na)         | Calcium sulph (+ iron ox + clay min)  |
| 295  | SFG     | 3         | -                            | G/LG      | -                 | -                | Fe                                | Si, Al, Ca      | (Cl) K, S, Na      | Mg, P, Ti, Na              | Mixture of iron ox and alum           |
| 538  | SFG     | 1         | Plat                         | LG        | Submicr           | Submicr          | <b>Fe</b>                         | (Si)            | (Al, Ca)           | (K, Cl, Ti, Mg, P)         | Iron ox (+ clay min)                  |
| 538  | SFG     | 3         | Irr/ang                      | W/LG      | 4-8               | 1-7              | <b>Fe</b>                         | (Si, Al)        | (Ca)               | (K, Cl, Mg, Ti, Na, S)     | Iron ox (+ clay min)                  |
| 538  | SFG     | 1         | Irr                          | LG        | 29,92             | 21,64            | Si (Fe)                           | (Al)            | (Ca)               | (K, Cl, Mg, Ti, Na)        | Silicate (+ iron ox)                  |
| 538  | SFG     | 1         | Aggl                         | G         | Submicr           | Submicr          | Si, Al                            | Fe, Na, K       | Ca                 | (Cl) Mg                    | Clay min (+ iron ox)                  |
| 538  | SFG     | 1         | Plat                         | G         | 28,24             | 12,84            | Si, Al                            | Fe, K           | Ca (Cl)            | Mg (Ti) Na                 | Mica (+ iron ox)                      |
| 538  | SFG     | 1         | Subcirc                      | W         | 1,84              | 1,81             | Ni (Fe)                           | (P)             | (Si, Al)           | (Ca, Cl, K, Ti, Mg)        | Undet Ni-rich particle (+ iron ox)    |
| 538  | SFG     | 4         | -                            | W/G       | -                 | -                | Fe (Si)                           | (Al)            | (Ca, K, Cl)        | (Mg, Ti, Na, P, S)         | Mixture of iron ox and alum           |
| 913  | SFG     | 2         | Irr                          | W         | Submicr           | Submicr          | <b>Fe</b>                         | (Si, Ca, Cl)    | (Al, K)            | (P, Mg) Mn (Ti, S)         | Iron ox (+ clay min + silicate)       |
| 913  | SFG     | 2         | Irr/aggl                     | W         | 4-11              | 4-10             | Fe (Si)                           | (Cl, Ca, Al)    | (K)                | (Mg, P, S, Ti) Mn (Na)     | Iron ox (+ clay min + carbonates)     |
| 913  | SFG     | 1         | Plat                         | G         | 26,83             | 16,67            | (Fe) Si                           | (Cl, Ca, Al)    | (K, S)             | (Mg, Na, P, Ti)            | Silicate (+ iron ox)                  |
| 913  | SFG     | 1         | Aggl                         | LG        | 8,07              | 5,93             | (Fe) Si                           | (Cl) Ca, Al     | K                  | Mg, Ti, P                  | Silicate (+ iron ox)                  |
| 913  | SFG     | 1         | Irr                          | LG        | 19,36             | 8,94             | Si (Fe)                           | Al, Ca (Cl)     | K, Mg              | (Ti, P) Na                 | Mica (+ iron ox)                      |
| 913  | SFG     | 1         | Ang                          | G         | 12,9              | 11,41            | Si, Al                            | (Fe) Na, Ca     | K (Cl)             | Ti, Mg, P                  | Na-rich feldspar (+ iron ox)          |
| 913  | SFG     | 4         | -                            | G         | -                 | -                | Fe, Si                            | (Cl) Ca, Al     | K                  | Mg, P, S, Ti, Na           | Mixture of iron ox and alum           |
| 919  | SFG     | 2         | Irr/subcirc                  | W         | Submicr-1         | Submicr-1        | <b>Fe</b>                         | (Si, Al)        | (Cl, Ca, P, K)     | (Mg, Ti, S)                | Iron ox (+ silicate)                  |
| 919  | SFG     | 3         | Irr                          | DG        | 7-8               | 3-5              | (Fe)                              | Si (Al)         | (Ca, Cl, P)        | (K, Mg, Ti, Na, S)         | Silicate (+ iron ox)                  |
| 919  | SFG     | 1         | Aggl                         | W         | Submicr           | Submicr          | Ba (Fe)                           | S               | (Si, Al, Ca)       | (Cl, K, P, Na, Mg)         | Ba sulph (+ iron ox + alum)           |
| 919  | SFG     | 1         | Ang                          | G         | 27,65             | 6,92             | (Fe) Ca, S                        | (Si)            | (Al, Cl, P, K)     | (Mg)                       | Calcium sulph (+ iron ox)             |
| 919  | SFG     | 3         | -                            | G/LG      | -                 | -                | Fe, Si                            | Al, Ca (Cl)     | P, K               | Mg, Ti                     | Mixture of iron ox and alum           |
| 919  | SFG     | 1         | -                            | W         | -                 | -                | (Fe) Ba                           | (Si, Al)        | (Cl) S (Ca, P)     | (Ti, K, Mg, Na)            | Mixture of Ba sulph, iron ox and alum |
| 930  | SFG     | 2         | Irr                          | W         | 2-3               | 1-2              | Fe (Si)                           | (Al, Ca, Cl)    | (K)                | (Mg, P, Ti, Na)            | Iron ox (+ clay min)                  |
| 930  | SFG     | 1         | Aggl                         | W         | 7,05              | 5,38             | (Si) Fe                           | (Ca, Al, Cl)    | (K)                | (Mg, P, Na)                | Iron ox (+ alum)                      |
| 930  | SFG     | 1         | Acic                         | W         | 4                 | 0,8              | <b>Fe</b>                         | (Si, Ca, Al)    | (Cl, K)            | (Mg, P, Ti)                | Iron ox (+ clay min)                  |
| 930  | SFG     | 2         | Irr/Aggl                     | G/DG      | Submicr           | Submicr          | Si (Fe)                           | Al, Ca, K       | (Cl) P             | Mg, Ti                     | Clay min (+ iron ox)                  |
| 930  | SFG     | 1         | Irr                          | DG        | 27,15             | 11,85            | Si (Fe)                           | Al, K, Ca       | (Cl)               | P, Mg, Na, S               | K-rich feldspar (+ clay min)          |
| 930  | SFG     | 2         | -                            | LG/DG     | -                 | -                | Fe, Si                            | Al, Cl (Ca)     | K                  | Mg, P, Ti, Na              | Mixture of iron ox and alum           |
| 987  | SFG     | 1         | Aggl                         | LG        | Submicr           | Submicr          | Fe (Si)                           | -               | 3a, Al, Ca) Mn (C) | (K, S, Mg, P)              | Iron ox (+ silicate + Ba sulph)       |
| 987  | SFG     | 1         | Ang                          | W         | 8,28              | 5,36             | Fe (Si)                           | -               | 4l, Ba) Mn (Ca, C) | (K, Mg, S, P, Na)          | Iron ox (+ silicate)                  |
| 987  | SFG     | 3         | Ang/plat                     | DG/B      | 6-37              | 3-14             | (Fe) Si                           | -               | (Al, Ba, Ca)       | (Cl, K, S, Mg, P)          | Silicate (+ iron ox + Ba sulph)       |
| 987  | SFG     | 2         | Tab                          | W         | 7-10              | 5-10             | <b>Ba</b>                         | (Fe) S (Si)     | Ca, Al             | (Cl, K, Mn, Na, Mg)        | Ba sulph (+ iron ox + clay min)       |
| 987  | SFG     | 3         | -                            | W/DG      | -                 | -                | Fe, Si, Ba                        | -               | Ca, Al, S (Cl) Mn  | K, P, Mg, Na               | Mixture of iron ox, alum and Ba sulph |
| 994  | SFG     | 4         | Plat/aggl                    | W/LG      | Submicr           | Submicr          | Fe (Si)                           | (Al)            | (K, Ca)            | (Cl, Mg, Na, Ti, P, S)     | Iron ox (+ clay min + silicate)       |
| 994  | SFG     | 5         | Irr                          | W         | 2-4               | 1-2              | Fe (Si)                           | (Al)            | (Ca, K)            | (Cl, Mg, Na, P, Ti, S)     | Iron ox (+ clay min)                  |
| 994  | SFG     | 1         | Irr                          | DG        | Submicr           | Submicr          | (Fe) Si                           | Al              | K, Ca              | (Cl) Mg, P                 | Clay min (+ iron ox)                  |
| 994  | SFG     | 1         | Plat                         | LG        | 2                 | 2                | (Fe) Si                           | Al              | K, Ca              | (Cl) Mg, P                 | Clay min (+ iron ox)                  |
| 994  | SFG     | 1         | Plat                         | LG        | 16,32             | 9,39             | (Fe) Si                           | Al              | K, Ca              | (Cl) Mg, Na, P             | K-rich mica (+ iron ox)               |
| 994  | SFG     | 4         | -                            | W/G       | -                 | -                | Fe, Si                            | Al              | K, Ca              | Mg, (Cl), Ti, Na, P, S     | Mixture of iron ox and alum           |
| 1635 | SFG     | 5         | Irr/aggl                     | W/G       | 1-4               | 1-2              | <b>Fe</b>                         | (Ca, Si)        | (Cl) Mn (Al, S)    | (K, Mg, P, Ti, Na)         | Iron ox (+ clay min + calcium sulph)  |
| 1635 | SFG     | 1         | Irr                          | LG        | 20,96             | 10,62            | <b>Fe</b>                         | -               | (Ca, Si) Mn (Cl)   | (Al, S, K, Mg, Ti, P)      | Iron ox (+ clay min)                  |
| 1635 | SFG     | 2         | Aggl                         | G/LG      | 2                 | 2                | (Fe) Si, Ca                       | Al              | (Cl) K, P          | Mg, Na (Mn) Ti, S          | Clay min (+ iron ox)                  |
| 1635 | SFG     | 1         | Irr                          | LG        | 4,77              | 4,1              | (Fe)                              | Si (Ca)         | (Cl, Al, Ba, Mn)   | (K, S, Mg, P)              | Silicate (+ iron ox)                  |
| 1635 | SFG     | 3         | Aggl                         | W/G       | 3-4               | 2-3              | (Fe) Ca, S                        | -               | (Si, Cl)           | (Al, P, Mn, K, Mg, Na, Ti) | Calcium sulph (+ iron ox)             |
| 1635 | SFG     | 3         | -                            | W/G       | -                 | -                | <b>Fe</b>                         | Ca, Si (Cl)     | Al, Mn             | K, P, Mg, S, Na, Ti        | Mixture of iron ox and alum           |
| 1914 | SFG     | 1         | Aggl                         | W         | 1,82              | 1,01             | Fe                                | (Ba, Si, Ca)    | (S, Al, Cl, K)     | (Mg, P, Na)                | Iron ox (+ Ba sulph + clay min)       |
| 1914 | SFG     | 2         | Aggl                         | G         | 5                 | 3-4              | Fe                                | (Ca, Si, S, Cl) | (Al, K, Ba)        | (Mg, Ti, P, Na)            | Iron ox (+ Ba sulph + clay min)       |
| 1914 | SFG     | 3         | Irr                          | G         | 2-4               | 2-4              | (Fe) Si                           | (Al, Ca)        | (Cl, K, Mg)        | (Ti, S, Na, P)             | Silicate (+ clay min)                 |
| 1914 | SFG     | 3         | Plat/aggl                    | W         | 1-4               | 1-4              | Ba (Fe)                           | S (Si, Ca)      | (Al, Cl)           | (K, Na, Mg, P, Mn)         | Ba sulph                              |
| 1914 | SFG     | 3         | -                            | G         | -                 | -                | Fe, Si                            | Ca (Cl) Al      | K                  | Mg, S, P, Ti, Na, Mn       | Mixture of iron ox and alum           |
| 1914 | SFG     | 1         | -                            | W         | -                 | -                | Fe, Si                            | Ba, Ca (Cl)     | Al, S, K           | Ti, Mg, P, Na              | Mixture of Ba sulph, iron ox and alum |
| 1927 | SFG     | 2         | Aggl                         | W         | 2                 | 2                | <b>Fe</b>                         | (Si)            | (Al, Ca, Cl)       | (K, Ti) Mn (Mg, S, Na, P)  | Iron ox (+ clay min)                  |
| 1927 | SFG     | 3         | Irr/aggl                     | W/G       | 5-8               | 4-8              | Fe                                | (Ca, Si, Al Cl) | (K, P)             | (Mg, S, Ti, Na)            | Iron ox (+ alum + clay min)           |
| 1927 | SFG     | 3         | Aggl                         | G         | 3-4               | 2-3              | Ca (Fe, Cl)                       | (Si)            | (Al)               | (K, Mg, P, S, Na, Mn, Ti)  | Carbonate (+ iron ox + clay min)      |
| 1927 | SFG     | 3         | -                            | W/G       | -                 | -                | <b>Fe</b>                         | Si, Ca (Cl) Al  | K                  | Mg, Mn, P, Ti, S, Na       | Mixture of iron ox and alum           |

|      |     |   |              |      |         |           |                |                 |                 |                                 |                                         |
|------|-----|---|--------------|------|---------|-----------|----------------|-----------------|-----------------|---------------------------------|-----------------------------------------|
| 306  | BFG | 2 | Irr/plat     | W    | Submicr | Submicr   | Fe (Si)        | (Al, Cl)        | (Ca, K, Mg)     | Mn (P, Ti, S)                   | Iron ox (+ clay min)                    |
| 306  | BFG | 1 | Tab          | W    | 22,85   | 8,52      | <b>Fe</b>      | (Si, Al, Cl)    | (Ca, K)         | (Mg, P, Ti)                     | Iron ox (+ clay min)                    |
| 306  | BFG | 1 | Irr/plat     | G    | Submicr | Submicr   | <b>(Fe)</b> Si | Al (Cl)         | Ca, K, Mg       | Mn, P, Ti, S                    | Clay min (+ iron ox)                    |
| 306  | BFG | 2 | -            | G/LG | -       | -         | <b>Fe</b>      | Si, Al (Cl)     | Ca, Mg          | K, Mn, Ti, P, S                 | Mixture of iron ox and alum             |
| 521  | BFG | 2 | Aggl         | W/LG | Submicr | Submicr   | <b>Fe</b>      | -               | (Si, Ca)        | n (Al, Cl, K, Mg, P, Ti, S, Na) | Iron ox (+ clay min)                    |
| 521  | BFG | 4 | Irr          | W    | 1-3     | 1-2       | <b>Fe</b>      | (Si, Ca)        | (Al, Cl, K)     | (Mg, P, Ti) Mn (S)              | Iron ox (+ clay min)                    |
| 521  | BFG | 1 | Plat         | G    | Submicr | Submicr   | (Fe) Si        | Al              | Ca (Cl)         | K, Mg, Ti, P                    | Clay min (+ iron ox)                    |
| 521  | BFG | 1 | Plat         | DG   | Submicr | Submicr   | <b>(Fe)</b> Si | (Ca)            | (Cl, K, Al)     | (Mn, P, Ti, Mg, S)              | Silicate (+ iron ox + clay min)         |
| 521  | BFG | 2 | Subcirc      | G    | 1-2     | Submicr-1 | (Fe) Si        | (Al, Ca)        | (K, Cl)         | (Mg, P, Na, S)                  | Silicate (+ iron ox + alum)             |
| 521  | BFG | 2 | Plat         | LG   | 9-17    | 7-8       | (Fe) P         | Ca (Si, Cl)     | (Al, K)         | (Mg, Ti, Na, S)                 | Calcium phosphate (+ iron ox)           |
| 521  | BFG | 1 | Irr          | DG   | 16,16   | 12,95     | (Fe) Ca (Cl)   | (Si)            | (Al, K, S)      | (P, Ti, Mg, Na)                 | Carbonate (+ iron ox + alum)            |
| 521  | BFG | 3 | -            | W/G  | -       | -         | <b>Fe</b>      | Si, Ca          | (Cl) Al         | K, Mg, P, S, Mn, Ti, Na         | Mixture of iron ox and alum             |
| 102  | HFG | 2 | Irr          | W    | Submicr | Submicr   | <b>Fe</b>      | (Si)            | (Al)            | Mn (Ca, K, Mg, Cl, Ti, P)       | Iron ox (+ clay min)                    |
| 102  | HFG | 5 | Irr          | W    | 4-7     | 2-4       | <b>Fe</b> (Si) | (Al)            | (K, Mg)         | (Ca) Mn (Cl, Ti, P)             | Iron ox (+ clay min)                    |
| 102  | HFG | 1 | Irr          | G    | 15      | 10        | Si             | (Fe)            | (Al)            | (K, Ca, Mg, Cl)                 | Silicate (+ iron ox)                    |
| 102  | HFG | 5 | Ang/plat     | G/LG | 18-80   | 8-21      | Si (Fe)        | -               | Al              | K, Ca, Cl, Mg                   | Mica (+ iron ox)                        |
| 102  | HFG | 2 | -            | LG/G | -       | -         | <b>Fe</b>      | Si              | Al, K, Ca       | (Cl) Mn, Mg, Ti, S, P           | Mixture of iron ox and alum             |
| 1419 | HFG | 2 | Irr          | G    | 2-3     | 1         | <b>Fe</b> (Si) | (Al)            | (K, Ca)         | (Mg) Mn (Cl, Ti, P)             | Iron ox (+ clay min)                    |
| 1419 | HFG | 5 | Plat         | W    | 4-5     | 1-3       | <b>Fe</b>      | (Si)            | (Al)            | Ca, Mg) Mn (Cl, Ti, Na, P)      | Iron ox (+ clay min)                    |
| 1419 | HFG | 1 | Ang          | G    | 8       | 6,40      | Si (Fe)        | -               | (Al, K)         | (Mg, Ca, Cl, P)                 | Silicate (+ iron ox)                    |
| 1419 | HFG | 1 | -            | W    | -       | -         | <b>Fe</b>      | Si, Al          | -               | (Mg, Mn, Ca (Cl) Ti, Na, P)     | Mixture of iron ox and alum             |
| 1419 | HFG | 1 | -            | G    | -       | -         | <b>Fe</b>      | Si, Al          | K               | Ca, Mg, Mn (Cl) Ti, P, Na       | Mixture of iron ox and alum             |
| 1419 | HFG | 1 | -            | DG   | -       | -         | <b>Fe</b>      | Si, Al          | K               | Mg, Ca, Mn (Cl) Ti, P, Na       | Mixture of iron ox and alum             |
| 1752 | HFG | 2 | Aggl         | W    | Submicr | Submicr   | <b>Fe</b>      | (Si)            | (Al, Ca)        | (K, Cl, Mg, P, Ti, Na)          | Iron ox (+ clay min)                    |
| 1752 | HFG | 2 | Plat         | W    | 7       | 5-6       | Fe (Si)        | (Al)            | (K, Ca, Mg, Cl) | (Ti, P, Na)                     | Iron ox (+ clay min)                    |
| 1752 | HFG | 1 | Aggl         | DG   | Submicr | Submicr   | Si (Fe)        | Ca, Al          | K, P (Cl) Mg    | Ti, S, Na                       | Clay min (+ iron ox)                    |
| 1752 | HFG | 2 | Aggl         | G    | 7-14    | 5-9       | Si (Fe)        | (Al)            | (Ca, K, Cl)     | (Mg, P, Ti, Na)                 | Silicate (+ iron ox)                    |
| 1752 | HFG | 1 | -            | LG   | 18,72   | 0,74      | (Si)           | (Fe, Al, K, Ca) | (Cl, Mg)        | (Ti, P)                         | Fibrous material (contamination)        |
| 1752 | HFG | 4 | -            | W    | -       | -         | Si, Fe         | Al, Ca          | K (Cl) Mg       | Ti, P, Na                       | Mixture of iron ox and alum             |
| 1510 | CG  | 7 | Aggl/Subcirc | W/LG | Submicr | Submicr   | <b>Fe</b>      | (Si, Al)        | (Ca, Cl)        | (S, K, Ti, Mg, P) Mn            | Iron ox (+ silicate)                    |
| 1510 | CG  | 1 | Plat         | W    | 15,06   | 10,24     | <b>Fe</b>      | (Si)            | (Al, Ca)        | (Cl, K, S, Ti, Mg)              | Iron ox (+ silicate)                    |
| 1510 | CG  | 1 | Subcirc      | DG   | 28,85   | 20,88     | Si (Fe)        | (Al)            | (Ca)            | (K, Cl, Mg, S)                  | Silicate (+ iron ox)                    |
| 1510 | CG  | 2 | Plat         | LG   | 16-17   | 5-11      | <b>(Fe)</b>    | Ca, S (Si)      | (Al)            | (Cl, K, Ti, Mg, Mn, P)          | Calcium sulph (+ iron ox + silicate)    |
| 1510 | CG  | 3 | -            | W/DG | -       | -         | <b>Fe, Si</b>  | Al              | Ca (Cl)         | S, K, Mg, Ti, P                 | Mixture of iron ox and silicates        |
| 1628 | CG  | 2 | Plat         | W    | 1-2     | 1         | <b>Fe</b>      | (Si)            | (Al)            | (Ca, K, S, Mg, Ti, Na, P)       | Iron ox (+ silicate)                    |
| 1628 | CG  | 2 | Plat         | G    | 2       | 1-2       | Si             | (Fe) Al, Ca     | K (Cl) Mg       | Na, Ti, P                       | Clay min (+ iron ox + silicate)         |
| 1628 | CG  | 2 | Subcirc      | G    | 23-1126 | 16-169    | Si             | (Fe, Al)        | (K, Ca, Mg, Cl) | (Ti, Na)                        | Silicate (+ iron ox + clay min)         |
| 1628 | CG  | 1 | Plat         | G    | 17,41   | 11,58     | Si, Al         | Ca, Na          | (Fe)            | K (Cl) Mg                       | Ca-rich feldspar (+ iron ox + silicate) |
| 1628 | CG  | 1 | -            | G    | -       | -         | <b>Si</b>      | -               | (Fe, Al)        | (K, Ca, Cl, Mg)                 | Silicate                                |
| 1628 | CG  | 3 | -            | W/LG | -       | -         | Si, Fe         | (Al)            | (Ca, Cl, K)     | (Mg, Ti, Na, P, S)              | Mixture of iron ox and silicates        |
| 101  | FS  | 2 | Aggl         | W    | Submicr | Submicr   | Fe (Si)        | (Ca)            | (Cl, Al)        | (K) Mn (Mg, Na, P)              | Iron ox (+ clay min + silicate)         |
| 101  | FS  | 3 | Irr/plat     | W    | 3-4     | 1-3       | Fe (Si)        | (Ca)            | (Cl, Al)        | Mn (Mg, K, Ti, P)               | Iron ox (+ clay min)                    |
| 101  | FS  | 3 | Irr/plat     | G    | 38-52   | 18-38     | Si (Fe)        | -               | (Al, Ca, Cl)    | (K, Na, Mg)                     | Silicate (+ iron ox + clay min)         |
| 101  | FS  | 2 | Tab          | G    | 10      | 7-8       | Si (Fe)        | -               | (Al, Ca, Cl)    | (K, Mg, P)                      | Silicate (+ iron ox + clay min)         |
| 101  | FS  | 2 | -            | W/DG | -       | -         | Fe, Si         | -               | Ca (Cl) Al      | K, Mg, Mn, Na, P, Ti, S         | Mixture of iron ox and silicates        |
| 973  | FS  | 3 | Plat         | W    | 1-3     | 1         | <b>Fe</b>      | (Si, Ca)        | (Al, Cl, K)     | (Mg, Ti, S, Na, P)              | Iron ox (+ silicate)                    |
| 973  | FS  | 2 | Aggl         | W    | 8-9     | 1-3       | Fe (Si)        | -               | (Ca, Al)        | (Cl, K, S, Ti, Mg, P)           | Iron ox (+ silicate)                    |
| 973  | FS  | 1 | Aggl         | LG   | Submicr | Submicr   | Si             | Ca, Fe (Cl)     | Al, K           | Mg, Ti, Na, S                   | Clay min (+ iron ox)                    |
| 973  | FS  | 3 | Irr/ang      | G    | 8-38    | 5-24      | Si             | (Fe)            | (Ca, Al)        | (Cl, S, Mg, K, Na)              | Silicate (+ iron ox)                    |
| 973  | FS  | 1 | Ang          | LG   | 14,03   | 9,54      | Ca, S          | (Fe, Si)        | (Al)            | (Cl, K, Mg, P, Na)              | Calcium sulph (+ iron ox + silicate)    |
| 973  | FS  | 2 | -            | W/G  | -       | -         | Fe, Si         | Al, Ca          | (Cl) K          | S, Mg, P, Ti, Na                | Mixture of iron ox and silicates/alum   |
| 436  | PFG | 2 | Plat         | W    | 2       | Submicr   | <b>Fe</b>      | (Si)            | -               | (Ca, Cl, Al, S, Mg, P, K)       | Iron ox (+ silicate)                    |
| 436  | PFG | 2 | Plat         | W/LG | 23-34   | 20        | <b>Fe</b>      | (Si)            | (Ca, Cl, Al)    | (K, S, Mg, P)                   | Iron ox (+ clay min)                    |
| 436  | PFG | 2 | Aggl         | G    | 1-3     | 1-2       | Si (Fe)        | Ca (Cl) Al      | -               | K, Mg, S                        | Clay min (+ iron ox)                    |
| 436  | PFG | 2 | Irr          | DG   | 2-3     | 1-2       | <b>Si</b>      | (Fe)            | -               | (Ca, Al, Cl, Mg)                | Silicate (+ iron ox)                    |
| 436  | PFG | 2 | -            | G    | -       | -         | <b>Fe</b>      | Si              | Ca (Cl) Al      | S, K, Mg, Ti, P                 | Mixture of iron ox and clay min         |
| 1812 | PFG | 3 | Irr/aggl     | G    | Submicr | Submicr   | <b>Fe</b>      | (Si)            | (Al, Ca)        | (Mg, K, Cl, S, Ti, Ba, P)       | Iron ox (+ clay min)                    |
| 1812 | PFG | 4 | Plat/tab     | W/G  | 45-78   | 11-48     | <b>Fe</b>      | (Si)            | (Al, Ca)        | Mg, K, Cl, S, Ti, P, Ba, Na     | Iron ox (+ clay min)                    |
| 1812 | PFG | 1 | Acic         | LG   | 32,67   | 1,59      | <b>Fe</b>      | (Si)            | (Al, Ca, Mg)    | (K, S, Cl, P, Ti, Na)           | Iron ox (+ clay min)                    |
| 1812 | PFG | 2 | Tab          | W    | 11-18   | 2-4       | <b>Ba (Fe)</b> | S               | (Si)            | (Al, Ca, Na, K, Mg)             | Ba sulph (+ iron ox)                    |
| 1812 | PFG | 3 | -            | W/G  | -       | -         | <b>Fe</b>      | Si              | Al, Ca          | Mg, K, S (Cl) Ti, P, Na         | Mixture of iron ox and alum             |

Num: number; raw mat; raw material; an: analyses; morph: morphology; cont: contrast; EDS: energy dispersive X-ray spectroscopy; SFG: soft fine-grained; BFG: banded fine-grained; HFG: hard fine-grained; CG: coarse-grained; FS: ferruginous sandstone; PFG: platy fine-grained; irr: irregular; plat: platy; aggl: agglomerate; subcirc: subcircular; acic: acicular; tab: tabular; clay min: clay mineral; W: white; G: grey; DG: dark grey; LG: light grey; submicr: submicrometric; ox: oxide; min: mineral; sulph: sulphate.

\* BSE cont. refers to the contrast observed on backscattered electron images.

\*\* Elements in brackets play no role in the mineralogical composition of the analysed items, elements in bold are present in a proportion equal to or greater than 40%.

\*\*\* Text in brackets indicates the interpretation of detected elements surrounding the analysed area.

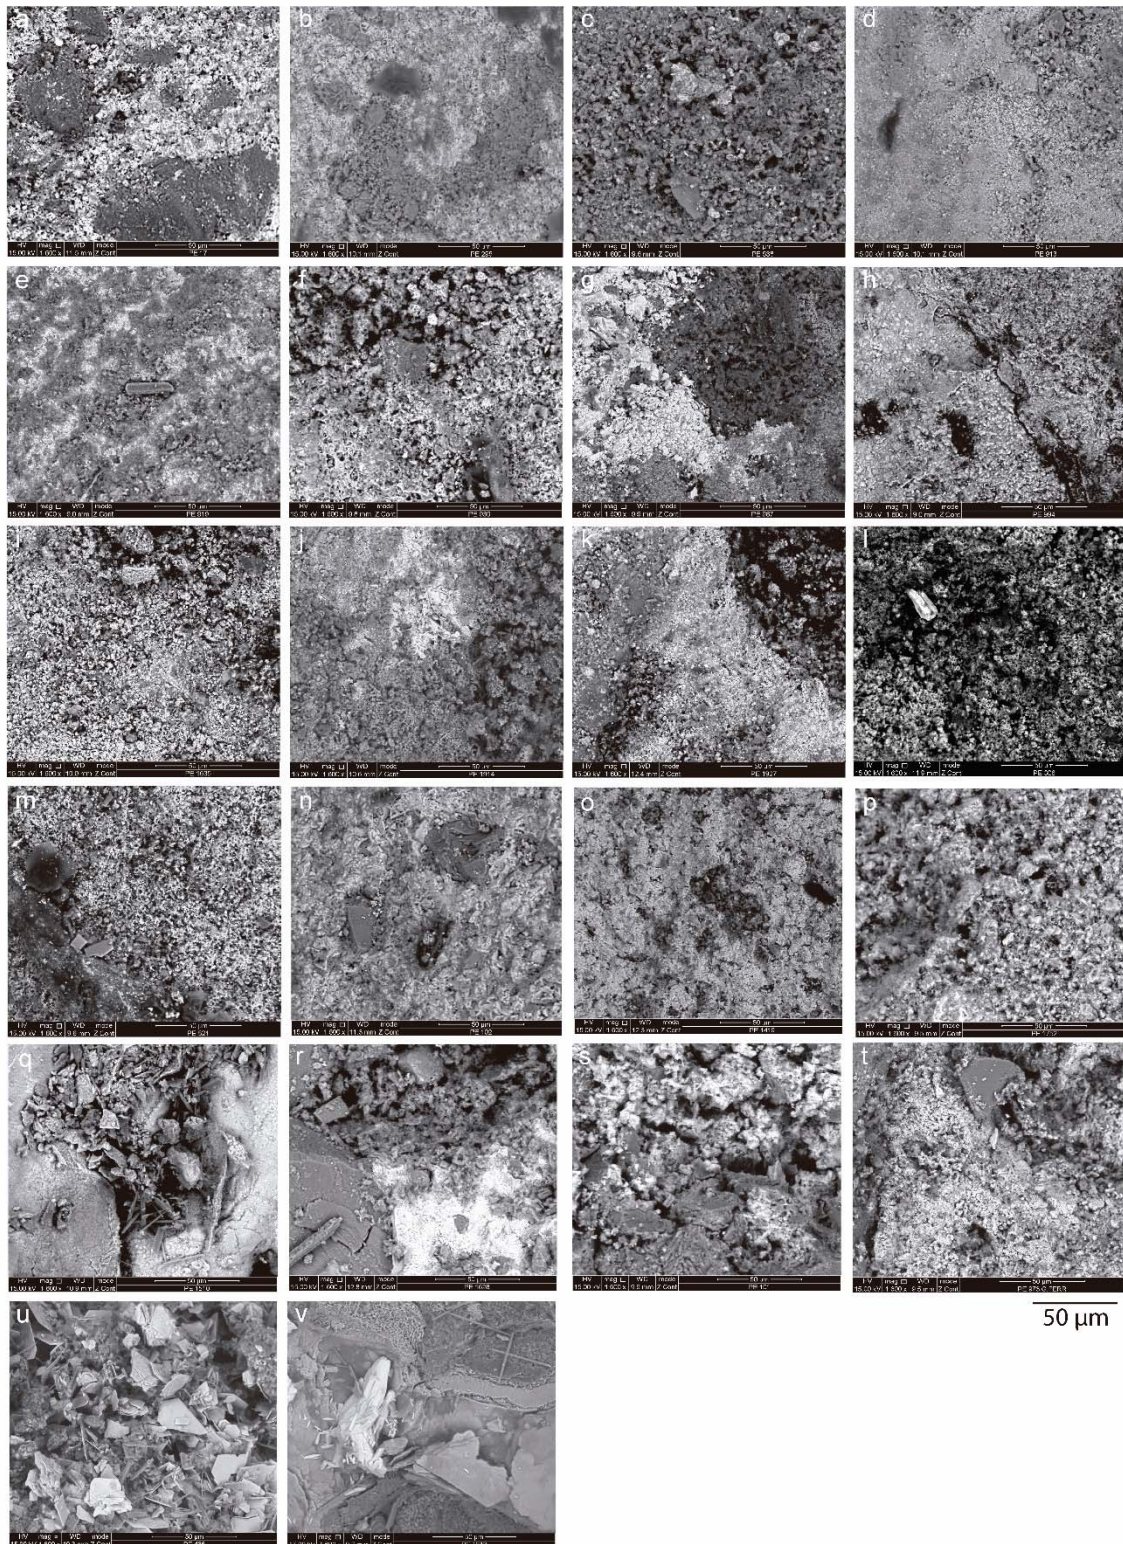

**S5 Supplementary Figure 1. SEM images of ochre pieces from Porc-Epic Cave.**

All figures are in backscattered electron (BSE) mode. a: ochre piece PE17, SFG; b: ochre piece PE295, SFG; c: ochre piece PE538, SFG; d: ochre piece PE913, SFG; e: ochre piece PE919, SFG; f: ochre piece PE930, SFG; g: ochre piece PE987, SFG; h: ochre piece PE994, SFG; i: ochre piece PE1635, SFG; j: ochre piece PE1914, SFG; k: ochre piece PE1927, SFG; l: ochre piece PE306, BFG; m: ochre piece PE102, HFG; n: ochre piece PE1419, HFG; o: ochre piece PE1752, HFG; q: ochre piece PE1510, CG; r: ochre piece PE1628, CG; s: ochre piece PE101, FS; t: ochre piece PE973, FS; u: ochre piece PE436, PFG; v: ochre piece PE1812, PFG. Scales = 50 µm.

## Elemental composition and texture by raw materials

**Pieces attributed to HFG** (Fig. 4n-p; Table 2; S5 Supplementary Fig. 1n-p; S5 Supplementary Table 2) show a matrix rich in small Fe particles (submicrometric to 7  $\mu\text{m}$  in length) containing few larger agglomerates or irregular grains (7-14  $\mu\text{m}$  in length) rich in Si and submicrometric grains rich in Si, Al and Ca, that were interpreted as silicates and clay minerals respectively.

**PFG ochre pieces** (Fig. 4u,v; Table 2, S5 Supplementary Fig. 1u,v; S5 Supplementary Table 2) are mostly composed of particles with a very high proportion of Fe. These particles, interpreted as iron oxides, mainly come in three shapes: (1) platy particles, the most frequent, variable in size (2-78  $\mu\text{m}$  in length); (2) large acicular particles (32  $\mu\text{m}$  in length); (3) agglomerates of irregular submicrometric particles. Other less frequent compounds found in the Fe-rich matrix include: agglomerates of small (1-3  $\mu\text{m}$  in length) Si, Al and Ca-rich grains interpreted as clay minerals, small (1-2  $\mu\text{m}$  in length) irregular grains rich in Si interpreted as silicates, and tabular grains (11-18) rich in Ba and S interpreted as Ba sulphates.

**CG ochre pieces** (Fig. 4q,r; Table 2, S5 Supplementary Fig. 1q,r; S5 Supplementary Table 2) are characterised by large particles different in morphology and composition: (1) subcircular grains rich in Si (23-1126  $\mu\text{m}$  in length), (2) platy particles rich in Si, Al, Ca (17  $\mu\text{m}$  in length), and (3) platy particles (16-17  $\mu\text{m}$  in length) rich in Ca and S. We interpret them as silicates, feldspars and calcium sulphates respectively. Smaller platy grains (2  $\mu\text{m}$  in length) rich in Si, Al and Ca, are interpreted as clay minerals. Fe-rich grains, interpreted as iron oxides, appearing in the form of agglomerates of submicrometric grains and larger platy particles (1-15  $\mu\text{m}$  in length), were also identified.

**FS ochre pieces** (Fig. 4s,t; Table 2, S5 Supplementary Fig. 1s,t; S5 Supplementary Table 2) feature irregular, angular and platy grains of variable size (8-30  $\mu\text{m}$  in length), rich in Si, interpreted as silicates. These grains are surrounded by agglomerates of Fe-rich particles of variable size (submicrometric to 9  $\mu\text{m}$  in length) featuring in some cases a platy morphology. Other identified particles include submicrometric agglomerates of particles rich in Si, Ca, Fe and Al interpreted as clay minerals and, more rarely, angular grains (14  $\mu\text{m}$  in length) rich in Ca and S, interpreted as calcium sulphates.

The analysis of **SFG pieces** (Fig. 4a-k; Table 2, S5 Supplementary Fig. 1a-k; S5 Supplementary Table 2) revealed that this raw material, which appears homogeneous macroscopically, is in fact the most heterogeneous in composition and texture. Distinctive

features are agglomerates of small particles of iron oxides (submicrometric to 4  $\mu\text{m}$ ), mostly irregular in shape but also including platy, and more rarely, acicular morphologies. Many pieces also feature agglomerates of larger iron oxide particles (5 to 30  $\mu\text{m}$  in length), irregular or angular in shape. These agglomerates are often embedded in or surrounded by other particles. Among these particles, those composed of Si are the most frequent. They generally appear in the form of irregular and more rarely platy or angular particles of variable size (submicrometric to 37  $\mu\text{m}$ ). Agglomerates of small platy and irregular grains rich in Si and Al, interpreted as clay minerals, are also detected. Other less frequent components include platy or irregular particles rich in Al and K with a length ranging from 16 to 28  $\mu\text{m}$ , interpreted as micas. A few pieces are rich in irregular or angular grains (12-27  $\mu\text{m}$  in length), mostly composed of Si, Al, K, interpreted as feldspars. Agglomerates of Ca sulphates (3-27  $\mu\text{m}$  in length) in the form of small grains or larger angular grains, and Ba sulphates (submicrometric to 10  $\mu\text{m}$  in length) were also identified. A single specimen (ochre piece PE538) shows the presence of an undetermined Ni-rich particle, interpreted as contamination.

**BFG pieces** (Fig. 4l,m; Table 2, S5 Supplementary Fig. 1l,m; S5 Supplementary Table 2) fall into the compositional and textural variability of SFG pieces. The main difference lies in a macroscopic feature: BFG pieces show layers of different colours. BFG also lacks micas, feldspars and sulphates. Such a difference, however, could be attributed to the few pieces of BFG analysed. As already mentioned for SFG, this raw material is characterised by the presence of iron oxides in the form of agglomerates of submicrometric grains, small (1-2  $\mu\text{m}$  in length) irregular grains or larger (22  $\mu\text{m}$  in length) tabular particles. Submicrometric agglomerates of grains interpreted as clay minerals, rich in Si, Al, Ca, and small platy and subcircular (submicrometric to 2  $\mu\text{m}$  in length) silicates are also identified. On a single piece, large grains (9-16  $\mu\text{m}$ ) rich in Ca, P and Ca respectively are interpreted as Ca phosphates and carbonates.

## S6 – Ochre pieces: mineralogical data

**S6 Supplementary Table 1. Results of XRD and  $\mu$ -XRD analyses on Porc-Epic Cave's ochre pieces and natural samples from the surrounding area.**

| Num  | Raw mat       | Type of an | ab | an | cal | gp | gth | hem | klh | mgh | mnt | ms | qz | sa |
|------|---------------|------------|----|----|-----|----|-----|-----|-----|-----|-----|----|----|----|
| 37   | SFG           | $\mu$ -XRD |    |    | •   |    |     | •   | •   | •   | •   | •  | •  |    |
| 282  | SFG           | $\mu$ -XRD |    |    | •   |    |     | •   | •   |     | •   |    | •  |    |
| 304  | SFG           | $\mu$ -XRD |    |    |     |    | •   | •   | •   |     | •   | •  | •  |    |
| 334  | SFG           | $\mu$ -XRD |    |    | •   | •  | •   | •   |     |     | •   | •  | •  |    |
| 363  | SFG           | $\mu$ -XRD |    |    |     |    |     | •   |     |     |     | •  | •  |    |
| 386  | SFG           | $\mu$ -XRD |    |    | •   |    |     | •   | •   |     | •   |    | •  |    |
| 392  | SFG           | $\mu$ -XRD |    |    | •   |    |     | •   |     |     | •   | •  | •  |    |
| 615  | SFG           | XRD        | •  |    |     |    |     | •   |     |     | •   |    | •  | •  |
| 710  | SFG           | XRD        | •  | •  | •   |    | •   |     |     |     |     |    | •  |    |
| 994  | SFG           | XRD        |    |    | •   |    |     | •   | •   |     |     |    | •  |    |
| 1277 | SFG           | XRD        |    |    |     |    |     | •   |     |     |     |    | •  |    |
| 1635 | SFG           | XRD        | •  |    | •   |    | •   | •   | •   |     |     |    | •  |    |
| 1981 | SFG           | XRD        | •  |    |     |    |     | •   |     |     |     |    | •  |    |
| 177  | BFG           | $\mu$ -XRD |    |    | •   |    | •   | •   | •   | •   | •   | •  | •  |    |
| 934  | BFG           | XRD        | •  |    |     |    | •   | •   |     |     |     |    | •  |    |
| 857  | HFG           | $\mu$ -XRD |    |    |     |    |     | •   |     |     |     |    | •  |    |
| 512  | CG            | $\mu$ -XRD |    |    |     |    |     | •   | •   |     | •   | •  | •  |    |
| 1510 | CG            | XRD        |    |    | •   |    | •   | •   | •   |     |     |    | •  |    |
| 1628 | CG            | XRD        |    |    |     |    |     | •   |     |     |     |    | •  |    |
| 366  | FS            | $\mu$ -XRD |    |    |     |    |     | •   | •   |     |     | •  | •  |    |
| 1679 | FS            | XRD        | •  |    |     |    |     | •   |     |     |     |    | •  |    |
| 436  | PFG           | XRD        |    |    |     |    | •   | •   |     |     |     |    | •  |    |
| 1812 | PFG           | XRD        | •  |    |     |    | •   | •   |     |     |     |    | •  | •  |
| Geo1 | Natural ochre | $\mu$ -XRD |    |    | •   |    | •   | •   | •   | •   | •   | •  | •  |    |
| Geo2 | Natural ochre | $\mu$ -XRD |    |    |     |    | •   |     | •   |     |     | •  | •  |    |
| Geo3 | Natural ochre | $\mu$ -XRD |    |    |     |    | •   | •   | •   |     |     | •  | •  |    |
| Geo4 | Natural ochre | $\mu$ -XRD |    |    |     |    | •   | •   | •   |     |     | •  | •  |    |
| Geo5 | Natural ochre | $\mu$ -XRD |    |    |     |    |     | •   | •   |     |     | •  | •  |    |
| Geo6 | Natural ochre | $\mu$ -XRD |    |    |     |    |     | •   | •   |     |     | •  | •  |    |

Num: number; mat: material; type of an: type of analysis; SFG: soft fine-grained; BFG: banded fine-grained; HFG: hard fine-grained; CG: coarse-grained; FS: ferruginous sandstone; PFG: platy fine-grained; XRD: X-ray diffraction;  $\mu$ -XRD: micro-X-ray diffraction. Abbreviations of minerals are based on the nomenclature suggested by <sup>116</sup>.



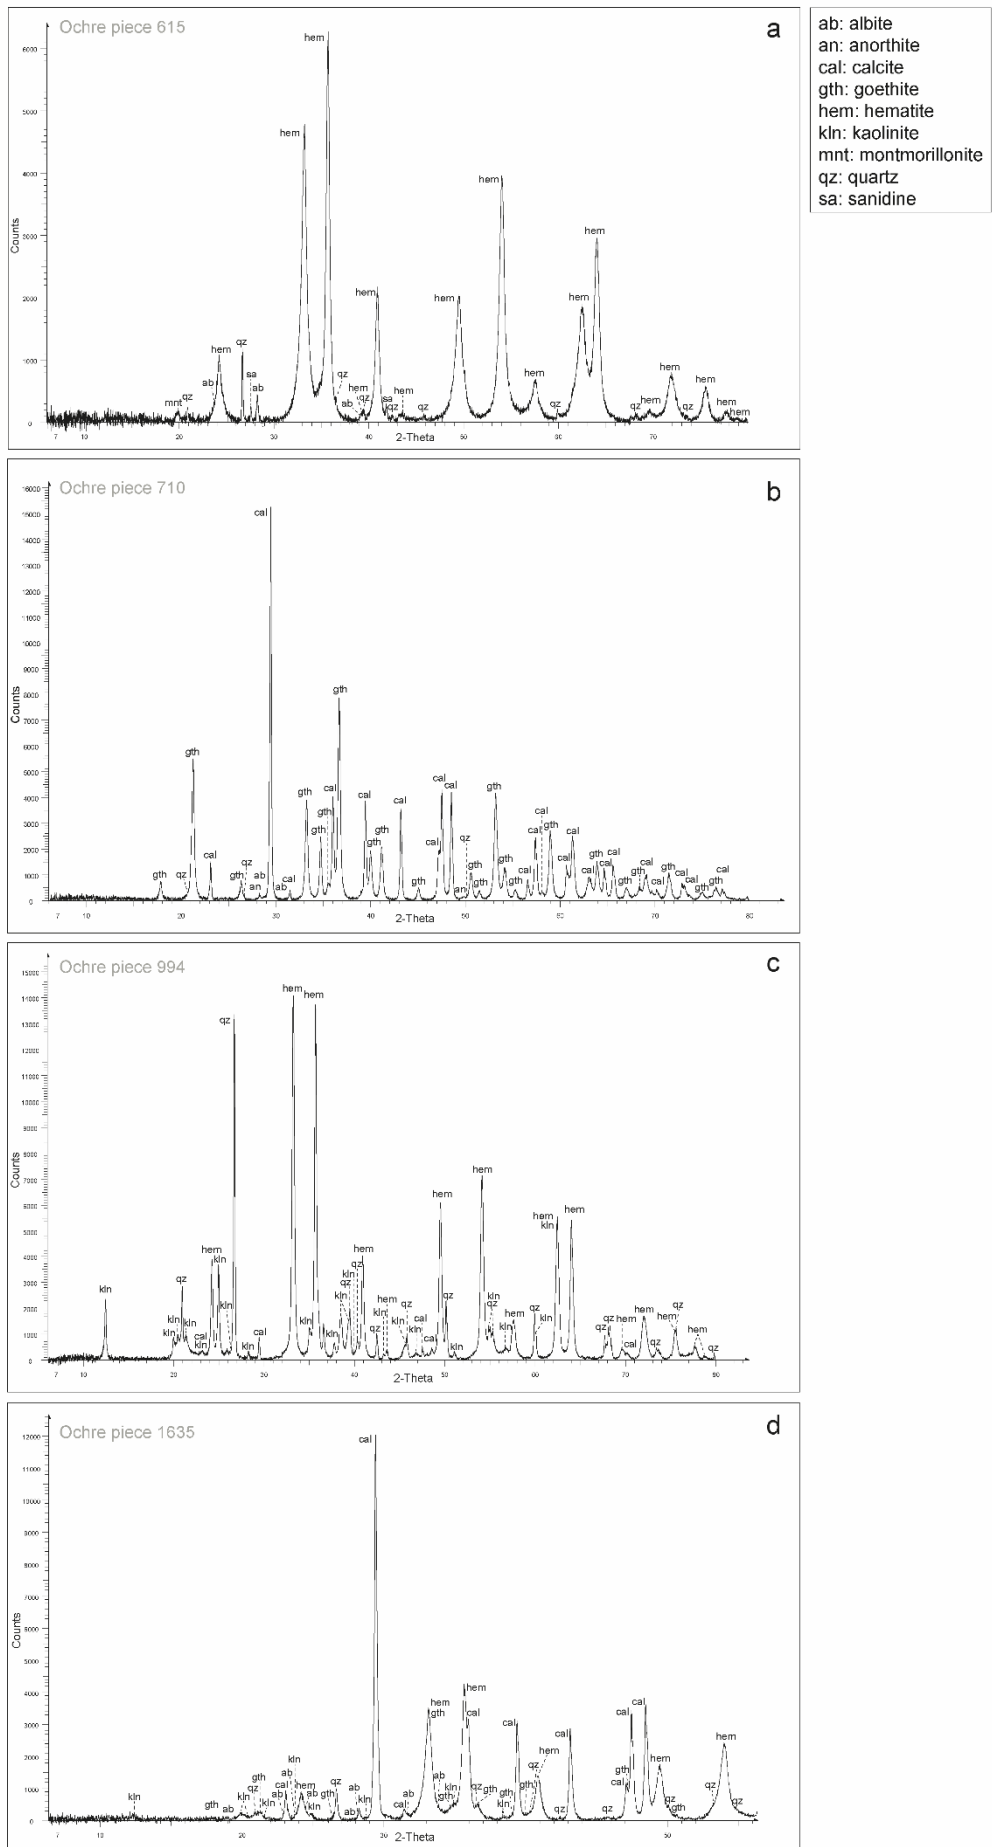

**S6 Supplementary Figure 1. Representative X-ray diffractograms obtained from the analysis of Porcupine Cave ochre pieces.**  
 a: ochre piece PE615; b: ochre piece PE710; c: ochre piece PE994; d: ochre piece PE1635.

**S6 Supplementary Table 2. Summarised results of  $\mu$ -Raman analyses conducted on Porc-Epic Cave's ochre pieces.**

| N    | Raw mat | ab | an | brt | cal | fluo | gth | gp | hp | hem | ilm | klm | lep | mag | man | mc | mnt | ms | nt | phl | qz | rt | un Mn ox | C |
|------|---------|----|----|-----|-----|------|-----|----|----|-----|-----|-----|-----|-----|-----|----|-----|----|----|-----|----|----|----------|---|
| 9    | SFG     |    |    |     | .   |      | .   |    |    | .   |     |     | .   |     |     |    |     | .  |    |     | .  |    |          |   |
| 17   | SFG     |    | .  |     |     |      | .   | .  |    | .   |     |     |     |     |     |    |     |    |    |     |    | .  |          |   |
| 51   | SFG     |    |    | .   |     |      |     |    |    | .   |     |     |     |     |     |    |     |    |    |     |    |    |          |   |
| 133  | SFG     |    |    |     |     |      |     |    |    | .   |     | .   |     |     |     |    |     |    |    |     |    |    |          |   |
| 295  | SFG     |    |    |     |     |      |     |    |    | .   |     |     |     |     |     |    |     |    |    |     |    | .  |          |   |
| 381  | SFG     |    |    |     |     |      |     |    |    | .   |     |     | .   |     |     |    |     |    |    |     |    | .  |          |   |
| 538  | SFG     |    |    |     |     |      | .   |    |    | .   | .   |     |     | .   |     |    |     | .  |    |     |    | .  |          |   |
| 610  | SFG     |    |    |     |     |      |     | .  |    | .   |     |     |     |     |     |    |     |    |    |     |    |    |          |   |
| 615  | SFG     |    |    |     |     |      |     |    |    | .   |     |     |     |     |     |    |     |    |    |     |    |    |          | . |
| 710  | SFG     |    |    |     |     |      | .   |    |    | .   |     |     |     |     |     | .  |     |    |    |     |    |    |          |   |
| 725  | SFG     |    |    |     |     |      |     |    |    | .   |     |     |     |     |     |    |     |    |    |     |    |    |          |   |
| 726  | SFG     |    |    |     | .   |      |     |    |    | .   |     |     |     |     |     |    |     |    |    |     |    |    |          |   |
| 737  | SFG     | .  |    |     |     |      |     |    |    | .   |     |     |     |     |     |    |     |    |    |     |    | .  |          |   |
| 913  | SFG     |    |    | .   |     |      |     | .  |    | .   |     |     |     |     |     |    |     |    |    |     |    |    |          |   |
| 919  | SFG     |    |    |     |     |      | .   | .  |    | .   |     |     |     |     |     |    |     |    |    |     |    |    |          |   |
| 930  | SFG     |    |    | .   | .   | .    | .   |    |    | .   |     |     |     |     |     |    |     | .  |    |     |    |    |          |   |
| 987  | SFG     |    |    |     |     |      |     |    |    | .   |     |     |     |     |     |    |     |    |    |     |    |    |          |   |
| 994  | SFG     |    |    | .   |     |      | .   |    |    | .   |     |     |     |     |     |    |     |    |    |     |    | .  |          | . |
| 1087 | SFG     | .  |    | .   |     |      |     |    |    | .   |     | .   |     |     |     |    |     | .  |    |     |    | .  |          |   |
| 1277 | SFG     |    |    |     |     |      |     |    |    | .   |     |     |     |     |     |    |     |    |    |     |    |    |          |   |
| 1427 | SFG     | .  |    |     | .   |      |     |    |    | .   |     |     |     |     |     |    |     |    |    |     |    |    |          |   |
| 1481 | SFG     | .  |    |     | .   |      |     |    |    | .   |     |     |     |     |     |    |     |    |    |     |    |    |          |   |
| 1491 | SFG     | .  |    |     | .   |      |     |    |    | .   |     |     |     |     |     |    | .   | .  |    |     |    |    |          | . |
| 1493 | SFG     |    |    |     |     |      |     |    |    | .   |     |     |     |     |     |    |     |    |    |     |    | .  |          |   |
| 1526 | SFG     | .  |    | .   |     |      | .   |    |    | .   |     |     |     |     |     |    |     |    |    |     |    | .  |          |   |
| 1552 | SFG     |    |    |     |     |      |     |    |    | .   |     |     |     |     |     |    |     |    |    |     |    |    | .        |   |
| 1566 | SFG     |    |    |     |     |      |     |    |    | .   |     |     |     |     |     |    |     |    |    |     |    | .  |          |   |
| 1626 | SFG     | .  | .  |     |     |      | .   |    |    | .   |     |     |     |     |     |    |     |    |    | .   |    |    |          |   |
| 1635 | SFG     | .  | .  |     |     |      |     | .  |    | .   |     |     |     |     |     |    |     |    |    |     |    | .  |          |   |
| 1637 | SFG     | .  |    |     |     |      | .   |    |    | .   |     |     |     |     |     |    |     |    |    |     |    |    |          |   |
| 1677 | SFG     | .  |    |     |     |      |     |    |    | .   |     | .   |     |     |     |    |     |    |    |     |    |    |          |   |
| 1699 | SFG     | .  | .  | .   |     |      |     |    |    | .   |     |     |     |     |     |    |     |    |    |     |    | .  |          |   |
| 1737 | SFG     |    |    |     |     |      | .   |    |    | .   |     |     |     |     |     |    |     | .  |    |     |    |    |          |   |
| 1780 | SFG     |    |    |     |     |      | .   |    |    | .   |     |     |     |     |     |    |     |    |    |     |    |    |          |   |
| 1845 | SFG     |    |    |     |     |      |     |    | .  | .   |     |     |     | .   |     |    |     | .  |    |     | .  | .  | .        | . |
| 1862 | SFG     | .  |    | .   | .   |      | .   |    |    | .   |     |     |     |     |     |    |     |    |    |     |    |    |          |   |
| 1914 | SFG     | .  |    |     |     |      |     |    |    | .   |     |     |     |     |     | .  |     |    |    |     |    |    |          |   |
| 1927 | SFG     | .  |    |     |     |      |     |    |    | .   |     |     |     | .   |     |    |     |    |    |     |    |    |          |   |
| 1942 | SFG     |    |    |     |     |      |     |    |    | .   |     |     |     |     |     |    |     |    |    |     |    |    |          |   |
| 1981 | SFG     |    |    |     |     |      | .   |    |    | .   |     |     |     |     |     |    |     | .  | .  |     | .  |    |          |   |
| 2023 | SFG     | .  |    |     |     |      | .   |    |    | .   |     |     |     |     |     |    |     | .  |    |     |    |    |          |   |
| 2063 | SFG     |    |    |     |     |      | .   | .  |    | .   |     |     |     |     |     |    |     |    |    |     |    |    |          | . |
| 2067 | SFG     |    |    |     |     |      |     |    |    | .   |     |     |     |     |     |    |     |    |    |     |    |    |          |   |
| 2069 | SFG     |    |    |     |     |      |     |    |    | .   |     |     |     |     |     |    |     |    |    |     |    |    |          |   |
| 2091 | SFG     |    |    |     |     |      | .   |    |    | .   |     |     |     |     |     |    |     |    |    |     | .  | .  |          | . |
| 2159 | SFG     |    | .  |     |     |      | .   |    |    | .   |     |     |     |     |     |    |     |    |    |     | .  | .  |          |   |
| 306  | BFG     |    |    |     |     |      | .   |    |    | .   |     |     |     |     |     |    |     |    |    |     |    |    |          | . |
| 521  | BFG     |    |    |     |     |      | .   |    |    | .   |     |     |     |     |     |    |     | .  |    |     |    |    |          |   |

|      |     |   |   |   |   |   |   |   |  |   |   |   |   |   |  |  |  |   |   |
|------|-----|---|---|---|---|---|---|---|--|---|---|---|---|---|--|--|--|---|---|
| 901  | BFG |   |   |   |   | . |   | . |  |   |   |   |   |   |  |  |  |   |   |
| 1499 | BFG |   |   |   |   | . |   | . |  | . | . |   |   |   |  |  |  | . |   |
| 1700 | BFG | . |   |   |   | . |   | . |  | . |   |   |   |   |  |  |  |   |   |
| 1806 | BFG |   |   |   |   | . |   | . |  | . |   |   |   |   |  |  |  | . |   |
| 2104 | BFG |   |   |   |   | . |   | . |  |   |   |   |   |   |  |  |  | . |   |
| 102  | HFG |   |   | . | . |   |   | . |  |   |   |   |   |   |  |  |  | . |   |
| 1419 | HFG |   |   |   |   |   |   | . |  |   |   |   |   |   |  |  |  | . |   |
| 1485 | HFG | . |   |   |   | . |   | . |  |   |   |   |   |   |  |  |  | . |   |
| 1585 | HFG |   |   |   |   | . |   | . |  |   |   |   |   |   |  |  |  |   |   |
| 1734 | HFG |   |   |   |   |   |   | . |  |   |   |   |   |   |  |  |  |   |   |
| 1752 | HFG |   |   |   |   |   |   | . |  |   |   |   |   |   |  |  |  |   |   |
| 2017 | HFG |   |   |   |   |   | . | . |  |   |   |   |   |   |  |  |  |   |   |
| 2047 | HFG |   |   |   |   |   |   | . |  |   |   |   |   |   |  |  |  |   |   |
| 2282 | HFG | . |   |   |   | . | . | . |  |   |   |   |   |   |  |  |  |   |   |
| 2375 | HFG |   |   |   |   |   |   | . |  |   |   |   |   |   |  |  |  |   |   |
| 32   | CG  | . |   |   |   | . |   | . |  |   |   | . |   |   |  |  |  | . |   |
| 809  | CG  |   |   |   |   |   |   | . |  |   |   | . |   |   |  |  |  | . |   |
| 1510 | CG  | . |   | . |   | . |   | . |  |   |   | . | . |   |  |  |  | . |   |
| 1580 | CG  |   |   |   |   |   |   | . |  | . |   |   |   |   |  |  |  | . | . |
| 1628 | CG  |   |   |   |   | . | . | . |  |   |   | . |   |   |  |  |  | . | . |
| 1666 | CG  |   |   | . |   | . |   | . |  |   |   |   |   |   |  |  |  | . |   |
| 101  | FS  | . |   |   |   | . |   | . |  |   |   |   |   | . |  |  |  | . |   |
| 385  | FS  |   |   |   |   | . |   | . |  | . |   |   |   |   |  |  |  | . |   |
| 965  | FS  |   |   |   |   |   |   | . |  |   |   |   |   |   |  |  |  | . |   |
| 973  | FS  |   |   |   |   | . |   | . |  |   |   |   |   |   |  |  |  | . |   |
| 1577 | FS  |   |   |   |   | . |   | . |  |   |   |   |   |   |  |  |  | . |   |
| 1679 | FS  | . | . |   | . |   |   | . |  |   |   |   |   | . |  |  |  | . |   |
| 436  | PFG |   |   |   |   | . |   | . |  | . |   |   |   |   |  |  |  | . |   |
| 1281 | PFG |   |   | . |   | . |   | . |  | . |   |   |   |   |  |  |  | . |   |
| 1603 | PFG |   |   |   |   |   |   | . |  |   |   |   |   |   |  |  |  |   |   |
| 1812 | PFG | . |   |   |   | . |   | . |  |   |   |   |   | . |  |  |  |   |   |
| 1985 | PFG |   |   |   |   | . |   | . |  |   |   |   |   |   |  |  |  |   |   |

N: number; mat: material; un: undetermined; ox: oxide; C: Carbon. Abbreviations of minerals are based on the nomenclature suggested by <sup>116</sup>, except for hp (hydroxyapatite); fluorapatite (fluo), lepidocrocite (lep), manganite (man) and natrojarosite (nt); SFG: soft fine-grained; BFG: banded fine-grained; HFG: hard fine-grained; CG: coarse-grained; FS: ferruginous sandstone; PFG: platy fine-grained.

**S6 Supplementary Table 3. Detailed results of  $\mu$ -Raman analyses conducted on Porc-Epic Cave's ochre pieces.**

| Num  | Raw mat | Num of an | Morph    | Grain colour | Identified compounds*   |
|------|---------|-----------|----------|--------------|-------------------------|
| 9    | SFG     | 1         | Aggl     | B            | hem (lep)               |
| 9    | SFG     | 1         | Aggl     | B            | hem (cal)               |
| 9    | SFG     | 1         | Irr      | R            | hem (ms)                |
| 9    | SFG     | 1         | Sub      | Y            | gth (hem)               |
| 9    | SFG     | 1         | Ang      | T            | qz (cal, hem, ms)       |
| 17   | SFG     | 1         | Aggl     | R            | hem                     |
| 17   | SFG     | 1         | Irr      | R            | hem (an, gth)           |
| 17   | SFG     | 2         | Aggl     | R/DR         | hem (gp)                |
| 17   | SFG     | 1         | Aggl     | B            | hem (an, qz)            |
| 17   | SFG     | 3         | Ang/irr  | T            | qz (hem)                |
| 17   | SFG     | 1         | Aggl     | W            | qz (hem)                |
| 51   | SFG     | 1         | Aggl     | B            | hem                     |
| 51   | SFG     | 2         | Aggl     | W            | brt                     |
| 133  | SFG     | 4         | Aggl     | R/DR         | hem                     |
| 133  | SFG     | 1         | Sub      | B            | hem (kln)               |
| 295  | SFG     | 1         | Aggl     | R/DR         | hem                     |
| 295  | SFG     | 1         | Aggl     | DR           | hem                     |
| 295  | SFG     | 1         | Aggl     | DR           | hem (qz)                |
| 381  | SFG     | 3         | Aggl     | R/DR         | hem                     |
| 381  | SFG     | 1         | Aggl     | DR           | hem (qz, lep)           |
| 538  | SFG     | 3         | Aggl     | DR           | hem                     |
| 538  | SFG     | 1         | Irr      | B            | hem (gth, ilm, man, qz) |
| 538  | SFG     | 1         | Tab      | Y            | hem (ms)                |
| 610  | SFG     | 4         | Aggl     | R/DR         | hem                     |
| 610  | SFG     | 1         | Aggl     | DR           | hem (gp)                |
| 615  | SFG     | 3         | Aggl     | R            | hem                     |
| 615  | SFG     | 2         | Ang      | DR/B         | hem                     |
| 615  | SFG     | 1         | Aggl     | DR           | hem                     |
| 615  | SFG     | 1         | Ang      | B            | C (hem)                 |
| 710  | SFG     | 2         | Aggl/sub | R            | hem                     |
| 710  | SFG     | 1         | Sub      | B            | hem                     |
| 710  | SFG     | 1         | Aggl     | G            | gth                     |
| 710  | SFG     | 1         | Aggl     | Y            | gth                     |
| 710  | SFG     | 1         | Aggl     | B            | gth (mc)                |
| 725  | SFG     | 3         | Aggl     | DR           | hem                     |
| 725  | SFG     | 1         | Ang      | B            | hem                     |
| 726  | SFG     | 1         | Aggl     | R            | hem                     |
| 726  | SFG     | 2         | Aggl     | DR           | hem (fluo)              |
| 737  | SFG     | 1         | Aggl     | R            | hem (an)                |
| 737  | SFG     | 3         | Aggl     | DG           | hem (an)                |
| 737  | SFG     | 1         | Aggl     | R            | hem (an, qz)            |
| 913  | SFG     | 1         | Aggl     | DR           | hem                     |
| 913  | SFG     | 3         | Aggl     | R/DR         | hem (cal, gp)           |
| 913  | SFG     | 1         | Sub      | B            | hem (cal, gp)           |
| 919  | SFG     | 2         | Aggl     | R/DR         | hem                     |
| 919  | SFG     | 1         | Sub      | B            | hem                     |
| 919  | SFG     | 2         | Aggl     | DR           | hem (gth)               |
| 919  | SFG     | 1         | Aggl     | DR           | hem (gp)                |
| 930  | SFG     | 1         | Irr      | DR           | hem                     |
| 930  | SFG     | 2         | Ang      | B            | gth                     |
| 930  | SFG     | 5         | Aggl     | Y            | gth                     |
| 930  | SFG     | 1         | Aggl     | Y            | gth (fluo)              |
| 930  | SFG     | 2         | Aggl     | Y            | gth (cal)               |
| 930  | SFG     | 1         | Plat     | B            | ms (gth)                |
| 987  | SFG     | 2         | Aggl     | R/DR         | hem                     |
| 987  | SFG     | 1         | Sub      | DR           | hem                     |
| 994  | SFG     | 1         | Sub      | DR           | hem                     |
| 994  | SFG     | 1         | Aggl     | R            | hem (cal, C)            |
| 994  | SFG     | 1         | Aggl     | B            | gth (qz)                |
| 1087 | SFG     | 1         | Aggl     | R            | hem                     |
| 1087 | SFG     | 1         | Aggl     | B            | hem (cal, qz)           |
| 1087 | SFG     | 1         | Sub      | B            | hem (cal, qz)           |
| 1087 | SFG     | 1         | Sub      | B            | hem (ab, lep, ms, qz)   |
| 1087 | SFG     | 1         | Ang      | T            | qz (hem)                |
| 1277 | SFG     | 4         | Aggl     | DR           | hem                     |
| 1277 | SFG     | 1         | Aggl     | DR           | hem                     |
| 1427 | SFG     | 6         | Aggl     | R/DR         | hem                     |
| 1427 | SFG     | 1         | Aggl     | R            | hem (an)                |
| 1427 | SFG     | 1         | Sub      | B            | hem (an)                |
| 1427 | SFG     | 2         | Aggl     | R            | hem (fluo)              |

|      |     |   |         |      |                        |
|------|-----|---|---------|------|------------------------|
| 1481 | SFG | 3 | Aggl    | R    | hem                    |
| 1481 | SFG | 3 | Ang/sub | B    | hem                    |
| 1481 | SFG | 1 | Aggl    | B    | hem (fluo)             |
| 1481 | SFG | 1 | Aggl    | B    | hem (an)               |
| 1491 | SFG | 1 | Aggl    | R    | hem                    |
| 1491 | SFG | 1 | Sub     | B    | hem                    |
| 1491 | SFG | 1 | Ang     | B    | hem (an, fluo, mnt, C) |
| 1491 | SFG | 2 | Aggl    | R/B  | hem (C, ms)            |
| 1493 | SFG | 2 | Aggl    | R    | hem                    |
| 1493 | SFG | 1 | Ang     | DR   | hem (qz)               |
| 1493 | SFG | 2 | Ang/irr | B    | hem (qz)               |
| 1526 | SFG | 1 | Sub     | R    | hem (gth, ab)          |
| 1526 | SFG | 2 | Aggl    | B/Y  | hem (gth, qz)          |
| 1526 | SFG | 1 | Sub     | DR   | hem (gth, qz)          |
| 1526 | SFG | 1 | Aggl    | T    | brt                    |
| 1526 | SFG | 1 | Aggl    | T    | brt (hem, gth)         |
| 1552 | SFG | 3 | Aggl    | DR   | hem                    |
| 1552 | SFG | 2 | Aggl    | DG   | hem                    |
| 1552 | SFG | 1 | Aggl    | DR   | hem (und. Mn ox)       |
| 1566 | SFG | 2 | Aggl    | R/B  | hem                    |
| 1566 | SFG | 2 | Ang     | T/B  | qz (hem)               |
| 1626 | SFG | 2 | Aggl    | DR   | hem                    |
| 1626 | SFG | 4 | Aggl    | R/DR | hem (gth)              |
| 1626 | SFG | 1 | Aggl    | R    | hem (an, gth)          |
| 1626 | SFG | 1 | Ang     | B    | hem (an, gth)          |
| 1626 | SFG | 1 | Aggl    | R    | hem (brt)              |
| 1626 | SFG | 1 | Aggl    | R    | hem (phl)              |
| 1635 | SFG | 1 | Aggl    | B    | hem                    |
| 1635 | SFG | 1 | Aggl    | DR   | hem (an)               |
| 1635 | SFG | 1 | Aggl    | R    | hem (ab, qz)           |
| 1635 | SFG | 1 | Sub     | W    | qz (an, hem, gp)       |
| 1635 | SFG | 1 | Ang     | DG   | qz (hem)               |
| 1637 | SFG | 1 | Aggl    | DR   | hem                    |
| 1637 | SFG | 2 | Aggl    | DR   | hem (ab)               |
| 1637 | SFG | 1 | Sub     | DR   | hem (ab)               |
| 1637 | SFG | 1 | Aggl    | DR   | hem (ab, gth)          |
| 1677 | SFG | 4 | Aggl    | R/DR | hem                    |
| 1677 | SFG | 1 | Aggl    | DG   | hem                    |
| 1677 | SFG | 1 | Aggl    | DR   | hem (kln)              |
| 1677 | SFG | 1 | Aggl    | DR   | hem (ab, kln)          |
| 1699 | SFG | 1 | Aggl    | DR   | hem                    |
| 1699 | SFG | 2 | Irr/sub | B    | hem                    |
| 1699 | SFG | 3 | Aggl    | DR/B | hem (an)               |
| 1699 | SFG | 1 | Aggl    | R    | hem (an, cal)          |
| 1699 | SFG | 1 | Ang     | B    | qz (ab, hem)           |
| 1737 | SFG | 3 | Aggl    | R    | hem                    |
| 1737 | SFG | 1 | Ang     | B    | hem                    |
| 1737 | SFG | 3 | Aggl    | R    | hem (gth)              |
| 1737 | SFG | 1 | Aggl    | DR   | hem (ms)               |
| 1780 | SFG | 1 | Aggl    | DR   | hem (gth)              |
| 1780 | SFG | 3 | Aggl    | R/DR | hem                    |
| 1780 | SFG | 2 | Ang     | B    | hem                    |
| 1845 | SFG | 4 | Aggl    | R    | hem                    |
| 1845 | SFG | 1 | Aggl    | R    | hem (mag)              |
| 1845 | SFG | 1 | Aggl    | R    | hem (und. Mn ox)       |
| 1845 | SFG | 1 | Aggl    | R    | hem (hp, qz)           |
| 1845 | SFG | 1 | Aggl    | R    | hem (qz)               |
| 1845 | SFG | 1 | Sub     | B    | hem (qz, ms)           |
| 1862 | SFG | 1 | Aggl    | DR   | hem (fluo)             |
| 1862 | SFG | 1 | Sub     | B    | hem (an)               |
| 1862 | SFG | 1 | Aggl    | DR   | hem (cal, gp)          |
| 1914 | SFG | 6 | Aggl    | R/DR | hem                    |
| 1914 | SFG | 1 | Aggl    | O    | hem                    |
| 1914 | SFG | 1 | Sub     | B    | hem                    |
| 1914 | SFG | 1 | Aggl    | DR   | hem (an)               |
| 1914 | SFG | 1 | Aggl    | B    | hem (mc)               |
| 1927 | SFG | 2 | Aggl    | R/DR | hem                    |
| 1927 | SFG | 1 | Sub     | B    | hem                    |
| 1927 | SFG | 1 | Aggl    | R    | hem (an, mag)          |
| 1942 | SFG | 4 | Aggl    | R/DR | hem                    |
| 1942 | SFG | 1 | Sub     | B    | hem                    |

|      |     |   |          |       |                    |
|------|-----|---|----------|-------|--------------------|
| 1981 | SFG | 4 | Aggl     | R/DR  | hem                |
| 1981 | SFG | 3 | Ang/irr  | B     | hem                |
| 1981 | SFG | 2 | Aggl/sub | R     | hem (gth)          |
| 1981 | SFG | 1 | Ang      | B     | nt (hem, gth, ms)  |
| 1981 | SFG | 1 | Ang      | B     | qz (hem, gth)      |
| 1981 | SFG | 1 | Irr      | T     | qz (hem)           |
| 2023 | SFG | 2 | Aggl     | R/DR  | hem                |
| 2023 | SFG | 1 | Aggl     | Y     | gth                |
| 2023 | SFG | 1 | Aggl     | DG    | gth (an)           |
| 2023 | SFG | 1 | Aggl     | DG    | gth (ms)           |
| 2063 | SFG | 1 | Aggl     | R     | hem                |
| 2063 | SFG | 1 | Aggl     | R     | hem (gth, gp)      |
| 2063 | SFG | 3 | Aggl     | B     | gth (hem, gp)      |
| 2063 | SFG | 1 | Ang      | B     | C (hem)            |
| 2067 | SFG | 4 | Aggl     | R /DG | hem                |
| 2069 | SFG | 3 | Aggl     | R     | hem                |
| 2069 | SFG | 1 | Sub      | B     | hem                |
| 2091 | SFG | 2 | Aggl     | R     | hem                |
| 2091 | SFG | 1 | Sub      | B     | hem                |
| 2091 | SFG | 1 | Aggl     | DR    | hem (gth)          |
| 2091 | SFG | 1 | Aggl     | B     | gth (qz)           |
| 2091 | SFG | 1 | Ang      | W     | rt (hem, gth)      |
| 2091 | SFG | 1 | Ang      | B     | C                  |
| 2159 | SFG | 2 | Aggl     | R/DG  | hem                |
| 2159 | SFG | 1 | Aggl     | DG    | hem (brt)          |
| 2159 | SFG | 1 | Aggl     | Y     | gth (hem)          |
| 2159 | SFG | 1 | Ang      | B     | qz (hem)           |
| 2159 | SFG | 1 | Ang      | W     | rt (hem)           |
| 306  | BFG | 2 | Aggl     | R     | hem (gth)          |
| 306  | BFG | 1 | Sub      | DR    | hem (gth)          |
| 306  | BFG | 1 | Aggl     | Y     | gth (hem)          |
| 306  | BFG | 3 | Aggl     | Y     | gth                |
| 306  | BFG | 1 | Sub      | B     | C                  |
| 521  | BFG | 2 | Aggl     | R     | hem (ms)           |
| 521  | BFG | 1 | Ang      | B     | gth                |
| 521  | BFG | 2 | Aggl     | Y     | gth                |
| 521  | BFG | 2 | Aggl     | Y     | gth (hem)          |
| 901  | BFG | 1 | Aggl     | R     | hem                |
| 901  | BFG | 2 | Aggl/sub | B     | gth                |
| 901  | BFG | 1 | Aggl     | DG    | gth                |
| 901  | BFG | 1 | Aggl     | Y     | gth                |
| 1499 | BFG | 1 | Aggl     | R     | hem                |
| 1499 | BFG | 1 | Aggl     | DR    | hem (gth)          |
| 1499 | BFG | 1 | Ang      | B     | gth                |
| 1499 | BFG | 1 | Aggl     | Y     | gth                |
| 1499 | BFG | 1 | Subcirc  | B     | qz (hem, gth)      |
| 1499 | BFG | 1 | Ang      | T     | qz (hem, mag)      |
| 1499 | BFG | 1 | Aggl     | B     | qz (hem, gth, mag) |
| 1499 | BFG | 1 | Irr      | B     | lep                |
| 1700 | BFG | 3 | Aggl     | DR    | hem                |
| 1700 | BFG | 1 | Aggl     | R     | hem (ab)           |
| 1700 | BFG | 5 | Aggl     | Y     | gth                |
| 1700 | BFG | 1 | Aggl     | B     | gth                |
| 1700 | BFG | 1 | Ang      | B     | gth (kln)          |
| 1806 | BFG | 2 | Aggl     | R     | hem                |
| 1806 | BFG | 1 | Sub      | B     | hem (qz)           |
| 1806 | BFG | 3 | Aggl     | Y     | gth                |
| 1806 | BFG | 1 | Aggl     | B     | gth                |
| 1806 | BFG | 1 | Irr      | B     | gth (mag)          |
| 1806 | BFG | 1 | Aggl     | Y     | gth (mag, hem)     |
| 2104 | BFG | 1 | Aggl     | R     | hem                |
| 2104 | BFG | 2 | Sub      | B     | hem                |
| 2104 | BFG | 5 | Aggl     | R/DR  | hem (gth)          |
| 2104 | BFG | 1 | Aggl     | B     | hem (gth, qz)      |
| 2104 | BFG | 4 | Aggl     | Y/O   | gth (hem)          |
| 2104 | BFG | 1 | Aggl     | Y     | gth (hem, qz)      |
| 102  | HFG | 1 | Aggl     | B     | hem (fluo)         |
| 102  | HFG | 2 | Aggl     | B     | gth                |
| 102  | HFG | 1 | Aggl     | Y     | gth                |
| 102  | HFG | 1 | Ang      | T     | qz (fluo, hem)     |
| 1419 | HFG | 2 | Aggl     | R     | hem                |
| 1419 | HFG | 1 | Sub      | DR    | hem                |
| 1419 | HFG | 1 | Aggl     | B     | hem                |
| 1419 | HFG | 2 | Aggl     | B     | hem (und. Mn ox)   |

|      |     |   |          |      |                            |
|------|-----|---|----------|------|----------------------------|
| 1485 | HFG | 2 | Aggl     | R    | hem                        |
| 1485 | HFG | 1 | Aggl     | R    | hem (gp)                   |
| 1485 | HFG | 1 | Aggl     | B    | hem (ab)                   |
| 1485 | HFG | 1 | Aggl     | DG   | hem (qz)                   |
| 1585 | HFG | 1 | Aggl     | R    | hem                        |
| 1585 | HFG | 2 | Aggl     | DG   | hem                        |
| 1585 | HFG | 1 | Aggl     | R    | hem (gth)                  |
| 1734 | HFG | 5 | Aggl     | R/DR | hem                        |
| 1752 | HFG | 2 | Aggl     | DR   | hem                        |
| 1752 | HFG | 2 | Aggl     | B    | hem                        |
| 2017 | HFG | 4 | Aggl     | DG   | hem                        |
| 2017 | HFG | 1 | Aggl     | R    | hem (gp)                   |
| 2047 | HFG | 3 | Aggl     | R/DG | hem                        |
| 2047 | HFG | 1 | Aggl     | DG   | hem                        |
| 2282 | HFG | 2 | Aggl     | DG   | hem                        |
| 2282 | HFG | 1 | Aggl     | DG   | hem (an)                   |
| 2282 | HFG | 1 | Aggl     | R    | hem (gp)                   |
| 2282 | HFG | 1 | Aggl     | DG   | hem (gth)                  |
| 2375 | HFG | 4 | Aggl     | DG   | hem                        |
| 32   | CG  | 1 | Aggl     | R    | hem                        |
| 32   | CG  | 2 | Aggl     | B    | hem                        |
| 32   | CG  | 1 | Sub      | B    | qz (an, gth)               |
| 32   | CG  | 1 | Aggl     | Y    | mc (hem)                   |
| 809  | CG  | 1 | Aggl     | DG   | hem                        |
| 809  | CG  | 1 | Sub      | DG   | hem (qz)                   |
| 809  | CG  | 1 | Aggl     | R    | hem (qz, ms)               |
| 809  | CG  | 2 | Ang      | DG   | qz (hem)                   |
| 1510 | CG  | 3 | Aggl     | B    | hem                        |
| 1510 | CG  | 1 | Sub      | DR   | hem                        |
| 1510 | CG  | 1 | Aggl     | B    | hem (gth, ab)              |
| 1510 | CG  | 1 | Aggl     | Y    | gth                        |
| 1510 | CG  | 1 | Aggl     | Y    | gth (cal)                  |
| 1510 | CG  | 1 | Ang      | B    | qz (hem, mc)               |
| 1510 | CG  | 1 | Ang      | W    | qz (ms)                    |
| 1510 | CG  | 1 | Aggl     | W    | cal (hem)                  |
| 1580 | CG  | 1 | Aggl     | DG   | hem                        |
| 1580 | CG  | 1 | Aggl     | DR   | hem (und. Mn ox)           |
| 1580 | CG  | 1 | Aggl     | R    | hem (lep)                  |
| 1580 | CG  | 1 | Sub      | T    | qz (hem)                   |
| 1628 | CG  | 4 | Aggl     | R/DR | hem                        |
| 1628 | CG  | 1 | Aggl     | O    | hem                        |
| 1628 | CG  | 1 | Aggl     | B    | hem                        |
| 1628 | CG  | 1 | Sub      | B    | hem (gth, und. Mn ox)      |
| 1628 | CG  | 1 | Aggl     | O    | gth                        |
| 1628 | CG  | 1 | Aggl     | Y    | gth (gp, man)              |
| 1628 | CG  | 2 | Ang      | T    | qz (hem)                   |
| 1666 | CG  | 2 | Aggl     | R    | hem                        |
| 1666 | CG  | 1 | Aggl     | Y    | gth                        |
| 1666 | CG  | 1 | Ang      | T    | qz                         |
| 1666 | CG  | 1 | Aggl     | B    | qz (cal)                   |
| 101  | FS  | 1 | Ang      | R    | hem                        |
| 101  | FS  | 1 | Sub      | B    | hem                        |
| 101  | FS  | 5 | Aggl/sub | R/DR | hem (qz)                   |
| 101  | FS  | 1 | Aggl     | DR   | hem (an, qz)               |
| 101  | FS  | 1 | Aggl     | R    | hem (an, gth, hem, qz, ms) |
| 101  | FS  | 3 | Aggl/irr | B    | gth, hem                   |
| 101  | FS  | 1 | Aggl     | T    | qz                         |
| 385  | FS  | 4 | Aggl     | R    | hem (gth)                  |
| 385  | FS  | 1 | Aggl     | R    | hem                        |
| 385  | FS  | 2 | Aggl     | Y    | gth                        |
| 385  | FS  | 1 | Aggl     | BL   | gth (qz)                   |
| 385  | FS  | 1 | Ang      | B    | mag                        |
| 385  | FS  | 1 | Ang      | B    | mag (hem)                  |
| 965  | FS  | 3 | Aggl/ang | B    | hem (qz)                   |
| 965  | FS  | 1 | Ang      | T    | qz                         |
| 965  | FS  | 1 | Ang      | T    | qz (hem)                   |
| 973  | FS  | 1 | Sub      | R    | hem                        |
| 973  | FS  | 1 | Sub      | Y    | gth                        |
| 973  | FS  | 2 | Irr/sub  | W    | qz (hem)                   |
| 1577 | FS  | 2 | Aggl     | DR/B | hem                        |
| 1577 | FS  | 1 | Aggl     | DG   | qz (hem, gth)              |
| 1577 | FS  | 1 | Ang      | T    | qz (hem, gth)              |

|      |     |   |      |      |                    |
|------|-----|---|------|------|--------------------|
| 1679 | FS  | 2 | Aggl | R    | hem                |
| 1679 | FS  | 1 | Sub  | B    | hem                |
| 1679 | FS  | 1 | Irr  | DR   | hem (ab)           |
| 1679 | FS  | 1 | Ang  | T    | qz                 |
| 1679 | FS  | 1 | Irr  | B    | qz (ms)            |
| 1679 | FS  | 1 | Aggl | W    | qz (hem, an, fluo) |
| 436  | PFG | 2 | Plat | B    | hem                |
| 436  | PFG | 1 | Aggl | B    | hem                |
| 436  | PFG | 1 | Plat | B    | hem (gp, kln, qz)  |
| 1281 | PFG | 2 | Aggl | R/DR | hem                |
| 1281 | PFG | 1 | Aggl | B    | hem                |
| 1281 | PFG | 1 | Aggl | B    | hem (mag, fluo)    |
| 1281 | PFG | 1 | Plat | B    | hem (mag, gp)      |
| 1603 | PFG | 2 | Aggl | R/B  | hem                |
| 1603 | PFG | 1 | Aggl | DG   | hem                |
| 1603 | PFG | 2 | Plat | DG   | hem                |
| 1812 | PFG | 2 | Aggl | R/B  | hem                |
| 1812 | PFG | 1 | Ang  | DR   | hem (gth)          |
| 1812 | PFG | 1 | Aggl | O    | hem (gth)          |
| 1812 | PFG | 1 | Aggl | B    | hem (gth)          |
| 1812 | PFG | 1 | Aggl | B    | hem (an, gth, ms)  |
| 1985 | PFG | 2 | Plat | DG   | hem                |
| 1985 | PFG | 1 | Aggl | DG   | hem                |
| 1985 | PFG | 1 | Plat | DG   | hem (gth)          |

Num: number; mat: material; an: analyses; morph: morphology; SFG: soft fine-grained; BFG: banded fine-grained; HFG: hard fine-grained; CG: coarse-grained; FS: ferruginous sandstone; PFG: platy fine-grained; aggl: agglomerate; irr: irregular; sub: subcircular; ang: angular; plat: platy; tab: tabular; B: black; R: red; Y: yellow; T: translucent; DR: dark red; W: white; G: grey; DG: dark grey; O: orange. Abbreviations of minerals are based on the nomenclature suggested by <sup>116</sup>, except for hp (hydroxylapatite); fluorapatite (fluo), lepidocrocite (lep), manganite (man) and natrojarosite (nt). Und: undetermined; ox: oxide; C: carbon.  
 \* Minerals between brackets come from grains surrounding the analysed grain.



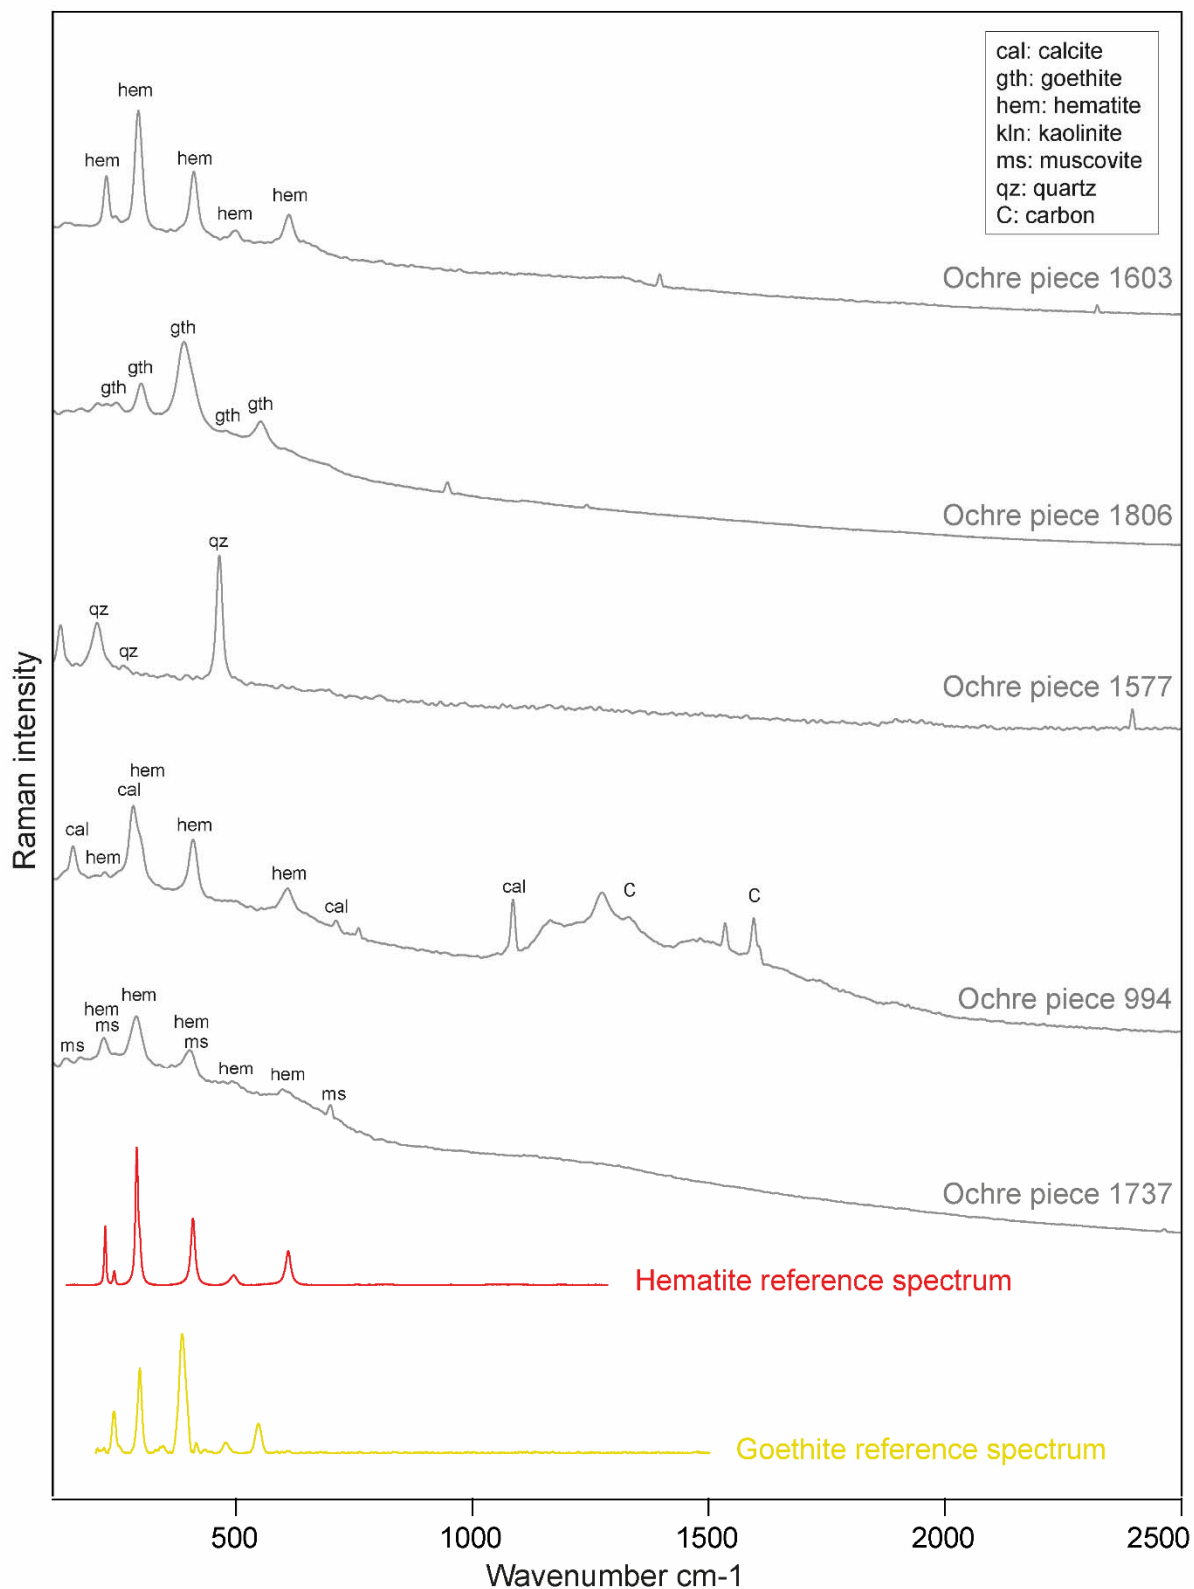

**S6 Supplementary Figure 2. Representative  $\mu$ -Raman spectra obtained from the analysis of Porc-Epic Cave ochre pieces.**

The hematite and goethite reference spectra are indicated in red and yellow respectively: RRUFF ID R110013 and X050091<sup>121</sup>.

## S7 – Methods

**S7 Supplementary Table 1. Number of analysed ochre pieces, ochre residues from ochre processing tools and ochre-stained artefacts from Porc-Epic Cave and natural ochre found in the wadi Laga Dächatu.**

| Artefact category            | $\mu$ -RS | XRD | $\mu$ XRD | SEM-EDS | EDXRF |
|------------------------------|-----------|-----|-----------|---------|-------|
| Ochre pieces                 | 80        | 12* | 11        | 22      | 80    |
| Ochre residue from OPT / OSA | 20        | 11  | -         | 12      | -     |
| Natural ochre pieces         | -         | -   | 6         | -       | 39    |

$\mu$ -RS: micro-Raman spectroscopy; XRD: X-ray diffraction;  $\mu$ XRD: micro X-ray diffraction; SEM-EDS: Scanning electron microscopy coupled with energy dispersive X-ray spectroscopy; EDXRF: energy dispersive X-ray fluorescence; OPT: ochre processing tool; OSA: ochre-stained artefact.

\* Analyses conducted on ochre powder samples obtained from grinding loose ochre microfragments.

**S7 Supplementary Table 2. Contextual, macroscopic and technological data of analysed pieces and detailed account of analyses conducted on ochre pieces, ochre residues from ochre processing tools and ochre-stained artefacts from Porc-Epic Cave and natural ochre found in the wadi Laga Dächatu.**

| Artefact category* | Piece num** | Square  | Depth   | Accumulation area | Modifications | Colour*** | Raw mat | μ-RS | XRD**** | μ-XRD | XRF | SEM-EDS |
|--------------------|-------------|---------|---------|-------------------|---------------|-----------|---------|------|---------|-------|-----|---------|
| OP                 | 9           | 03N-08W | 150-160 | -                 | -             | R         | SFG     | 5    |         |       | 5   |         |
| OP                 | 17          | 03N-11W | 90-100  | -                 | FK            | R         | SFG     | 9    |         |       | 5   | 10      |
| OP                 | 32          | 03N-12W | 100-110 | -                 | -             | R         | CG      | 3    |         |       | 5   |         |
| OP                 | 37          | 03N-12W | 100-110 | -                 | -             | R         | SFG     |      |         | 1     |     |         |
| OP                 | 51          | 04N-04W | 70-80   | SEA               | -             | R         | SFG     | 3    |         |       | 5   |         |
| OP                 | 101         | 04N-04W | 80-90   | SEA               | -             | O         | FS      | 7    |         |       | 5   | 12      |
| OP                 | 102         | 04N-04W | 80-90   | SEA               | G+SM          | R + O     | HFG     | 5    |         |       | 5   | 15      |
| OP                 | 133         | 04N-04W | 80-90   | SEA               | FK            | R         | SFG     | 4    |         |       | 5   |         |
| OP                 | 177         | 04N-05W | 60-70   | SEA               | -             | R + Y + O | BFG     |      |         | 1     |     |         |
| OP                 | 282         | 04N-05W | 70-80   | SEA               | G             | R         | SFG     |      |         | 1     |     |         |
| OP                 | 295         | 04N-05W | 80-90   | SEA               | -             | R         | SFG     | 3    |         |       | 5   | 10      |
| OP                 | 304         | 04N-05W | 80-90   | SEA               | FK+G          | R         | SFG     |      |         | 1     |     |         |
| OP                 | 306         | 04N-05W | 80-90   | SEA               | FK+G+SC       | Y         | BFG     | 8    |         |       | 5   | 6       |
| OP                 | 334         | 04N-05W | 100-110 | -                 | P+G           | R + G     | SFG     |      |         | 1     |     |         |
| OP                 | 363         | 04N-05W | 110-120 | -                 | FK            | R         | SFG     |      |         | 1     |     |         |
| OP                 | 366         | 04N-05W | 110-120 | -                 | -             | R + BR    | FS      |      |         | 1     |     |         |
| OP                 | 381         | 04N-05W | 110-120 | -                 | -             | R + G     | SFG     | 4    |         |       | 5   |         |
| OP                 | 385         | 04N-05W | 110-120 | -                 | -             | Y         | FS      | 10   |         |       | 5   |         |
| OP                 | 386         | 04N-05W | 120-130 | -                 | -             | R + G     | SFG     |      |         | 1     |     |         |
| OP                 | 392         | 04N-05W | 120-130 | -                 | -             | R         | SFG     |      |         | 1     |     |         |
| OP                 | 436         | 04N-07W | 60-70   | SEA               | -             | R + G     | PFG     | 4    | 1       |       | 5   | 10      |
| OP                 | 512         | 04N-07W | 60-70   | SEA               | -             | R + G     | CG      |      |         | 1     |     |         |
| OP                 | 521         | 04N-07W | 60-70   | SEA               | FK            | R + Y     | BFG     | 4    |         |       | 4   | 16      |
| OP                 | 538         | 04N-07W | 60-70   | SEA               | -             | R + G     | SFG     | 5    |         |       | 5   | 12      |
| OP                 | 610         | 04N-07W | 90-100  | SEA               | -             | R + BL    | SFG     | 5    |         |       | 5   |         |
| OP                 | 615         | 04N-07W | 90-100  | SEA               | -             | R + BL    | SFG     | 7    | 1       |       | 5   |         |
| OP                 | 710         | 04N-07W | 150-160 | -                 | -             | Y         | SFG     | 6    | 1       |       | 5   |         |
| OP                 | 725         | 04N-08W | 60-70   | -                 | FK            | R         | SFG     | 4    |         |       | 5   |         |
| OP                 | 726         | 04N-08W | 60-70   | -                 | -             | R         | SFG     | 3    |         |       | 5   |         |
| OP                 | 737         | 04N-08W | 60-70   | -                 | -             | R         | SFG     | 5    |         |       | 5   |         |
| OP                 | 809         | 07N-15W | 120-130 | -                 | -             | R + G     | CG      | 5    |         |       | 5   |         |
| OP                 | 857         | 08N-08W | 100-110 | NEA               | FK+G+SC       | R + G     | HFG     |      |         | 1     |     |         |
| OP                 | 901         | 08N-08W | 110-120 | NEA               | -             | Y         | BFG     | 5    |         |       | 5   |         |
| OP                 | 913         | 08N-08W | 110-120 | NEA               | FK+G+SC       | R         | SFG     | 5    |         |       | 5   | 12      |
| OP                 | 919         | 08N-08W | 110-120 | NEA               | -             | R + G     | SFG     | 6    |         |       | 5   | 11      |
| OP                 | 930         | 08N-08W | 110-120 | NEA               | FK            | Y         | SFG     | 12   |         |       | 5   | 9       |
| OP                 | 934         | 08N-08W | 120-130 | NEA               | G+SC          | R + Y     | BFG     |      | 1       |       |     |         |
| OP                 | 965         | 04N-04W | 70-80   | SEA               | -             | R + G     | FS      | 5    |         |       | 5   |         |
| OP                 | 973         | 04N-07W | 60-70   | SEA               | G             | R         | FS      | 4    |         |       | 5   | 12      |
| OP                 | 987         | 07N-13W | 210-220 | -                 | G+SC          | R         | SFG     | 3    |         |       | 4   | 10      |
| OP                 | 994         | 03N-04W | 60-70   | -                 | -             | R + G     | SFG     | 3    | 1       |       | 4   | 16      |
| OP                 | 1087        | 05N-07W | 100-110 | -                 | -             | P         | SFG     | 5    |         |       | 5   |         |
| OP                 | 1277        | 06N-07W | 180-190 | -                 | G             | R         | SFG     | 5    | 1       |       | 5   |         |
| OP                 | 1281        | 06N-07W | 180-190 | -                 | G             | G         | PFG     | 5    |         |       | 5   |         |
| OP                 | 1419        | 05N-04W | 70-80   | -                 | FK+G+SC       | G         | HFG     | 6    |         |       | 5   | 11      |
| OP                 | 1427        | 05N-04W | 100-110 | -                 | SC            | R + O     | SFG     | 10   |         |       | 5   |         |
| OP                 | 1481        | 05N-05W | 100-110 | -                 | -             | R         | SFG     | 8    |         |       | 5   |         |
| OP                 | 1485        | 05N-05W | 100-110 | -                 | FK            | R + G     | HFG     | 5    |         |       | 5   |         |
| OP                 | 1491        | 05N-05W | 110-120 | -                 | G             | R         | SFG     | 5    |         |       | 5   |         |
| OP                 | 1493        | 05N-05W | 110-120 | -                 | FK+G          | R         | SFG     | 5    |         |       | 5   |         |
| OP                 | 1499        | 05N-05W | 130-140 | -                 | FK+G          | R + Y     | BFG     | 8    |         |       | 5   |         |
| OP                 | 1510        | 05N-05W | 140-150 | -                 | -             | R + Y     | CG      | 10   | 1       |       | 5   | 14      |
| OP                 | 1526        | 05N-07W | 110-120 | -                 | -             | G         | SFG     | 6    |         |       | 5   |         |
| OP                 | 1552        | 05N-06W | 160-170 | -                 | FK            | R         | SFG     | 6    |         |       | 5   |         |
| OP                 | 1566        | 05N-08W | 100-110 | -                 | -             | R + P     | SFG     | 4    |         |       | 5   |         |
| OP                 | 1577        | 05N-08W | 110-120 | -                 | -             | BR        | FS      | 4    |         |       | 5   |         |
| OP                 | 1580        | 05N-08W | 110-120 | -                 | FK            | R + G     | CG      | 4    |         |       | 5   |         |
| OP                 | 1585        | 05N-08W | 110-120 | -                 | FK            | G         | HFG     | 4    |         |       | 5   |         |
| OP                 | 1603        | 05N-08W | 110-120 | -                 | -             | R + G     | PFG     | 5    |         |       | 5   |         |
| OP                 | 1626        | 05N-08W | 120-130 | -                 | G             | R         | SFG     | 10   |         |       | 5   |         |
| OP                 | 1628        | 05N-08W | 120-130 | -                 | -             | R         | CG      | 11   | 1       |       | 5   | 11      |
| OP                 | 1635        | 05N-08W | 140-150 | -                 | G+SM          | P         | SFG     | 5    | 1       |       | 5   | 15      |
| OP                 | 1637        | 05N-08W | 140-150 | -                 | G             | R         | SFG     | 5    |         |       | 5   |         |

|          |       |         |         |     |       |             |     |    |   |    |
|----------|-------|---------|---------|-----|-------|-------------|-----|----|---|----|
| OP       | 1666  | 05N-09W | 120-130 | -   | FK    | G           | CG  | 5  |   | 5  |
| OP       | 1677  | 05N-09W | 140-150 | -   | G     | R           | SFG | 7  |   | 5  |
| OP       | 1679  | 05N-09W | 140-150 | -   | -     | R           | FS  | 7  | 1 | 5  |
| OP       | 1699  | 05N-11W | 130-140 | -   | G+SC  | P           | SFG | 8  |   | 5  |
| OP       | 1700  | 05N-11W | 130-140 | -   | G     | R + O       | BFG | 11 |   | 5  |
| OP       | 1734  | 05N-14W | 170-180 | -   | FK+G  | R + G       | HFG | 5  |   | 5  |
| OP       | 1737  | 05N-14W | 170-180 | -   | G     | R           | SFG | 8  |   | 5  |
| OP       | 1752  | 05N-14W | 190-200 | -   | G     | P + G       | HFG | 4  |   | 5  |
| OP       | 1780  | 06N-08W | 120-130 | -   | FK+G  | R           | SFG | 6  |   | 5  |
| OP       | 1806  | 06N-08W | 130-140 | -   | FK+G  | R + Y       | BFG | 9  |   | 5  |
| OP       | 1812  | 06N-08W | 130-140 | -   | G     | R + G       | PFG | 6  | 1 | 5  |
| OP       | 1845  | 06N-08W | 190-200 | -   | FK    | R           | SFG | 9  |   | 5  |
| OP       | 1862  | 06N-09W | 170-180 | -   | G     | R           | SFG | 3  |   | 5  |
| OP       | 1914  | 07N-08W | 120-130 | -   | FK+G  | R           | SFG | 10 |   | 5  |
| OP       | 1927  | 07N-08W | 140-150 | -   | G     | R           | SFG | 4  |   | 5  |
| OP       | 1942  | 07N-08W | 180-190 | -   | -     | R           | SFG | 5  |   | 5  |
| OP       | 1981  | 07N-09W | 200-210 | -   | -     | R           | SFG | 12 | 1 | 5  |
| OP       | 1985  | 07N-09W | ?       | -   | -     | R + G       | PFG | 4  |   | 5  |
| OP       | 2017  | 07N-11W | 130-140 | -   | G     | R           | HFG | 5  |   | 5  |
| OP       | 2023  | 07N-11W | 140-150 | -   | FK+G  | R + P       | SFG | 4  |   | 5  |
| OP       | 2047  | 07N-11W | 160-170 | -   | FK+G  | R           | HFG | 4  |   | 5  |
| OP       | 2063  | 07N-11W | 170-180 | -   | FK+G  | R + O       | SFG | 6  |   | 5  |
| OP       | 2067  | 07N-11W | 170-180 | -   | FK    | R           | SFG | 4  |   | 5  |
| OP       | 2069  | 07N-11W | 170-180 | -   | FK+G  | R           | SFG | 4  |   | 5  |
| OP       | 2091  | 07N-11W | 170-180 | -   | FK+G  | P           | SFG | 7  |   | 5  |
| OP       | 2104  | 07N-12W | 140-150 | -   | FK+G  | R + P       | BFG | 14 |   | 5  |
| OP       | 2159  | 07N-14W | 140-150 | -   | FK+SM | P           | SFG | 6  |   | 5  |
| OP       | 2282  | 08N-13W | 110-120 | -   | FK+G  | G           | HFG | 5  |   | 5  |
| OP       | 2375  | 08N-13W | 150-160 | -   | FK+G  | P           | HFG | 4  |   | 5  |
| OR (OPT) | 1     | 04N-12W | 130-140 | -   | NA    | R + (Y)     | NA  | 5  | 1 | 14 |
| OR (OPT) | 2     | 07N-09W | 170-180 | -   | NA    | R + Y       | NA  | 7  |   | 14 |
| OR (OPT) | 3     | 10N-07W | 160-170 | NEA | NA    | R           | NA  | 5  | 1 | 12 |
| OR (OPT) | 4     | 08N-07W | 150-160 | NEA | NA    | R+(Y)       | NA  | 6  |   | 8  |
| OR (OSA) | 5     | 06N-07W | 110-120 | -   | NA    | R + B + (Y) | NA  | 4  | 1 | 11 |
| OR (OPT) | 6     | 08N-13W | 150-160 | -   | NA    | R + (Y)     | NA  | 3  | 1 | 9  |
| OR (OPT) | 7     | 09N-07W | 110-120 | NEA | NA    | R + (Y)     | NA  | 12 | 1 | 13 |
| OR (OPT) | 8     | -       | 120-130 | -   | NA    | R + (Y)     | NA  | 5  | 1 |    |
| OR (OPT) | 9     | 08N-08W | 110-120 | NEA | NA    | R + (B + Y) | NA  | 8  | 1 | 15 |
| OR (OPT) | 10    | 10N-07W | 120-130 | NEA | NA    | R + (Y)     | NA  | 8  | 1 |    |
| OR (OPT) | 11    | -       | ?       | -   | NA    | R           | NA  | 9  |   |    |
| OR (OPT) | 12    | -       | 150-160 | -   | NA    | R           | NA  | 5  | 1 | 6  |
| OR (OPT) | 13    | 08N-07W | 150-160 | NEA | NA    | BRR + Y     | NA  | 4  |   | 9  |
| OR (OPT) | 14    | 09N-07W | 120-130 | NEA | NA    | R + (Y)     | NA  | 7  |   |    |
| OR (OSA) | 15    | 09N-07W | 120-130 | NEA | NA    | R + (Y)     | NA  | 7  |   | 9  |
| OR (OPT) | 16    | 09N-07W | 120-130 | NEA | NA    | R + (Y)     | NA  | 6  |   |    |
| OR (OPT) | 17    | 09N-07W | 120-130 | NEA | NA    | R + (Y)     | NA  | 9  | 1 |    |
| OR (OPT) | 18    | 09N-07W | 120-130 | NEA | NA    | R + (Y + O) | NA  | 7  | 1 |    |
| OR (OPT) | 19    | 09N-07W | 120-130 | NEA | NA    | R + (Y)     | NA  | 7  |   |    |
| OR (OPT) | 22    | 07N-16W | 200-210 | -   | NA    | R + (Y)     | NA  | 2  |   | 18 |
| Nat      | Geo1  | NA      | NA      | NA  | NA    | R+Y         | Nat |    | 1 | 2  |
| Nat      | Geo2  | NA      | NA      | NA  | NA    | R+Y         | Nat |    | 1 | 2  |
| Nat      | Geo3  | NA      | NA      | NA  | NA    | R+Y         | Nat |    | 1 |    |
| Nat      | Geo4  | NA      | NA      | NA  | NA    | R+Y         | Nat |    | 1 | 1  |
| Nat      | Geo5  | NA      | NA      | NA  | NA    | R           | Nat |    | 1 | 1  |
| Nat      | Geo6  | NA      | NA      | NA  | NA    | G           | Nat |    | 1 | 3  |
| Nat      | XP1   | NA      | NA      | NA  | NA    | R           | Nat |    |   | 6  |
| Nat      | XP3   | NA      | NA      | NA  | NA    | R           | Nat |    |   | 3  |
| Nat      | XP4   | NA      | NA      | NA  | NA    | R           | Nat |    |   | 2  |
| Nat      | XP5   | NA      | NA      | NA  | NA    | R           | Nat |    |   | 2  |
| Nat      | XP6   | NA      | NA      | NA  | NA    | R           | Nat |    |   | 2  |
| Nat      | Laga1 | NA      | NA      | NA  | NA    | R           | Nat |    |   | 3  |
| Nat      | Laga2 | NA      | NA      | NA  | NA    | R           | Nat |    |   | 3  |
| Nat      | Laga3 | NA      | NA      | NA  | NA    | R           | Nat |    |   | 3  |
| Nat      | Laga4 | NA      | NA      | NA  | NA    | R           | Nat |    |   | 3  |
| Nat      | Laga5 | NA      | NA      | NA  | NA    | R           | Nat |    |   | 3  |
| Nat      | Laga6 | NA      | NA      | NA  | NA    | R           | Nat |    |   | 3  |

|     |        |    |    |    |    |   |     |   |
|-----|--------|----|----|----|----|---|-----|---|
| Nat | Laga7  | NA | NA | NA | NA | R | Nat | 3 |
| Nat | Laga8  | NA | NA | NA | NA | R | Nat | 3 |
| Nat | Laga9  | NA | NA | NA | NA | R | Nat | 3 |
| Nat | Laga10 | NA | NA | NA | NA | R | Nat | 3 |
| Nat | Laga11 | NA | NA | NA | NA | R | Nat | 3 |
| Nat | Laga12 | NA | NA | NA | NA | R | Nat | 3 |
| Nat | Laga13 | NA | NA | NA | NA | R | Nat | 3 |
| Nat | Laga14 | NA | NA | NA | NA | R | Nat | 3 |
| Nat | Laga15 | NA | NA | NA | NA | R | Nat | 3 |
| Nat | Laga16 | NA | NA | NA | NA | R | Nat | 3 |
| Nat | Laga17 | NA | NA | NA | NA | R | Nat | 3 |
| Nat | Laga18 | NA | NA | NA | NA | R | Nat | 3 |
| Nat | Laga19 | NA | NA | NA | NA | R | Nat | 3 |
| Nat | Laga20 | NA | NA | NA | NA | R | Nat | 3 |
| Nat | Laga21 | NA | NA | NA | NA | R | Nat | 3 |
| Nat | Laga22 | NA | NA | NA | NA | R | Nat | 3 |
| Nat | Laga23 | NA | NA | NA | NA | R | Nat | 3 |
| Nat | Laga24 | NA | NA | NA | NA | R | Nat | 3 |
| Nat | Laga25 | NA | NA | NA | NA | R | Nat | 3 |
| Nat | Laga26 | NA | NA | NA | NA | R | Nat | 3 |
| Nat | Laga27 | NA | NA | NA | NA | R | Nat | 3 |
| Nat | Laga28 | NA | NA | NA | NA | R | Nat | 3 |
| Nat | Laga29 | NA | NA | NA | NA | R | Nat | 3 |

Num: number; raw mat: raw material;  $\mu$ -RS: micro-Raman spectroscopy; XRD: X-ray diffraction;  $\mu$ -XRD: micro X-ray diffraction; XRF: X-ray fluorescence; SEM-EDS: scanning electron microscopy coupled with energy dispersive X-ray spectroscopy; OP: ochre piece; OR: ochre residue; OPT: ochre processing tool; OSA: ochre-stained artefact; nat: natural ochre pieces; SEA: southeastern area; NEA: northeastern area; FK: flaking; G: grinding; SM: smoothing; SC: scraping; P: pitting; NA: not applicable; R: red; O: orange; Y: yellow; BR: brown; G: grey; BL: black; P: purple; SFG: soft fine-grained; BFG: banded fine-grained; HFG: hard fine-grained; CG: coarse-grained; FS: ferruginous sandstone; PFG: platy fine-grained. Numbers indicate the number of analyses conducted on the ochre pieces and residues.

(\*) Analyses on ochre processing tools (OPT) and ochre-stained artefacts (OSA) were conducted on ochre residues sampled from their surface.

(\*\*) In the case of OPT and OSA, piece numbers correspond to the artefact number where the ochre residue was found, not the ochre sample number.

(\*\*\*) In brackets, coloured residue visible under microscopy.

(\*\*\*\*) Analyses conducted on ochre powder samples obtained from grinding loose ochre microfragments originally attached to the indicated ochre piece or on ochre residues sampled from ochre processing tools and ochre-stained artefacts.

## Supplementary references

1. d'Errico, F. & Stringer, C. B. Evolution, revolution or saltation scenario for the emergence of modern cultures? *Philos. Trans. R. Soc. B Biol. Sci.* **366**, 1060–1069 (2011). 10.1098/rstb.2010.0340
2. Henshilwood, C. S. & Marean, C. W. The origin of modern human behavior: Critique of the models and their test implications. *Curr. Anthropol.* **44**, 627–651 (2003).
3. McBrearty, S. & Brooks, A. S. The revolution that wasn't: a new interpretation of the origin of modern human behavior. *J. Hum. Evol.* **39**, 453–563 (2000). 10.1006/jhev.2000.0435
4. d'Errico, F. Le rouge et le noir: implications of early pigment use in Africa, the Near East and Europe for the origin of cultural modernity. *South Afr. Archaeol. Soc. Goodwin Ser.* **10**, 168–174 (2008).
5. Wadley, L. Recognizing Complex Cognition through Innovative Technology in Stone Age and Palaeolithic Sites. *Camb. Archaeol. J.* **23**, 163–183 (2013). 10.1017/S0959774313000309
6. Zilhão, J. The emergency of language, art and symbolic thinking in *Homo Symbolicus: The dawn of language, imagination and spirituality* (eds. Henshilwood, C. S. & D'Errico, F.) 111–131 (John Benjamins Publishing Company, 2011).
7. Brooks, A. S. *et al.* Long-distance stone transport and pigment use in the earliest Middle Stone Age. *Science* **360**, 90–94 (2018). 10.1126/science.aao2646
8. Conard, N. J. An overview of the patterns of behavioral change in Africa and Eurasia during the Middle and Late Pleistocene in *From Tools to Symbols from Early Hominids to Humans*. (eds. d'Errico, F. & Backwell, L.) 294–332 (Wits University Press, 2005).
9. d'Errico, F. The invisible frontier. A multiple species model for the origin of behavioral modernity. *Evol. Anthropol. Issues News Rev.* **12**, 188–202 (2003). 10.1002/evan.10113
10. d'Errico, F., García Moreno, R. & Rifkin, R. F. Technological, elemental and colorimetric analysis of an engraved ochre fragment from the Middle Stone Age levels of Klasies River Cave 1, South Africa. *J. Archaeol. Sci.* **39**, 942–952 (2012). 10.1016/j.jas.2011.10.032
11. d'Errico, F. & Banks, W. E. Identifying Mechanisms behind Middle Paleolithic and Middle Stone Age Cultural Trajectories. *Curr. Anthropol.* **54**, S371–S387 (2013). 10.1086/673388
12. Dubreuil, B. & Henshilwood, C. S. Material culture and language in *New Perspectives on the Origins of Language* (eds. Lefebvre, C., Comrie, B. & Cohen, H.) 147–170 (Studies in Language Companion Series 144, John Benjamins Publishing Company, 2013). 10.1075/slcs.144.06dub
13. Watts, I. The pigments from Pinnacle Point Cave 13B, Western Cape, South Africa. *J. Hum. Evol.* **59**, 392–411 (2010). 10.1016/j.jhevol.2010.07.006

14. Watts, I. Red ochre, body painting, and language: interpreting the Blombos ochre in *The Cradle of Language* (eds. Botha, R. & Knight, C.) 62–92 (Oxford University Press, 2009).
15. Watts, I. Ochre in the Middle Stone Age of Southern Africa: Ritualised Display or Hide Preservative? *South Afr. Archaeol. Bull.* **57**, 1–14 (2002). 10.2307/3889102
16. Zilhão, J. The Emergence of Ornaments and Art: An Archaeological Perspective on the Origins of “Behavioral Modernity”. *J. Archaeol. Res.* **15**, 1–54 (2007). 10.1007/s10814-006-9008-1
17. Zilhão, J. *et al.* Symbolic use of marine shells and mineral pigments by Iberian Neandertals. *Proc. Natl. Acad. Sci.* **107**, 1023–1028 (2010). 10.1073/pnas.0914088107
18. Havenga, D. *et al.* From Himba indigenous knowledge to engineered Fe<sub>2</sub>O<sub>3</sub> UV-blocking green nanocosmetics. *Sci. Rep.* **12**, 2259 (2022). 10.1038/s41598-021-04663-0
19. Kozowyk, P. R. B., Langejans, G. & Poulis, J. A. Lap Shear and Impact Testing of Ochre and Beeswax in Experimental Middle Stone Age Compound Adhesives. *PLoS ONE* **11**, e0150436 (2016). 10.1371/journal.pone.0150436
20. Rifkin, R. Assessing the efficacy of red ochre as a prehistoric hide tanning ingredient. *J. Afr. Archaeol.* **9**, 131–58 (2011). 10.3213/2191-5784-10199
21. Rifkin, R. F. Processing ochre in the Middle Stone Age: Testing the inference of prehistoric behaviours from actualistically derived experimental data. *J. Anthropol. Archaeol.* **31**, 174–195 (2012). 10.1016/j.jaa.2011.11.004
22. Rifkin, R. F., d’Errico, F., Dayet-Bouillot, L. & Summers, B. Assessing the photoprotective effects of red ochre on human skin by in vitro laboratory experiments. *South Afr. J. Sci.* **111**, 1–8 (2015). 10.17159/sajs.2015/20140202
23. Rifkin, R. F. *et al.* Evaluating the Photoprotective Effects of Ochre on Human Skin by In Vivo SPF Assessment: Implications for Human Evolution, Adaptation and Dispersal. *PLOS ONE* **10**, e0136090 (2015). 10.1371/journal.pone.0136090
24. Rossano, M. J. Making friends, making tools, and making symbols. *Curr. Anthropol.* **51**, S89–S98 (2010). 10.1086/650481
25. Velo, J. Ochre as Medicine: A Suggestion for the Interpretation of the Archaeological Record. *Curr. Anthropol.* **25**, 674–674 (1984). 10.1086/203205
26. Wadley, L. Compound-Adhesive Manufacture as a Behavioral Proxy for Complex Cognition in the Middle Stone Age. *Curr. Anthropol.* **51**, S111–S119 (2010). 10.1086/649836
27. Wadley, L. Putting ochre to the test: replication studies of adhesives that may have been used for hafting tools in the Middle Stone Age. *J. Hum. Evol.* **49**, 587–601 (2005). 10.1016/j.jhevol.2005.06.007

28. Wadley, L., Hodgskiss, T. & Grant, M. Implications for complex cognition from the hafting of tools with compound adhesives in the Middle Stone Age, South Africa. *Proc. Natl. Acad. Sci.* **106**, 9590–9594 (2009). 10.1073/pnas.0900957106
29. Wadley, L., Williamson, B. & Lombard, M. Ochre in hafting in Middle Stone Age southern Africa: a practical role. *Antiquity* **78**, 661–675 (2004). 10.1017/S0003598X00113298
30. Wynn, T. & Coolidge, F. L. Beyond Symbolism and Language: An Introduction to Supplement 1, Working Memory. *Curr. Anthropol.* **51**, S5–S16 (2010). 10.1086/650526
31. Zipkin, A. M., Wagner, M., McGrath, K., Brooks, A. S. & Lucas, P. W. An Experimental Study of Hafting Adhesives and the Implications for Compound Tool Technology. *PLOS ONE* **9**, e112560 (2014). 10.1371/journal.pone.0112560
32. Rifkin, R. F. Ethnographic and experimental perspectives on the efficacy of red ochre as a mosquito repellent. *South Afr. Archaeol. Bull.* **70**, 64–75 (2015).
33. Rosso D.E. Aproximación etnoarqueológica al uso de colorantes para el tratamiento del cabello: el caso de los Hamar (Etiopía). *Pyrenae* **48**, 123–149 (2017). 10.1344/Pyrenae2017.vol48num2.4
34. Hodgskiss, T. & Wadley, L. How people used ochre at Rose Cottage Cave, South Africa: Sixty thousand years of evidence from the Middle Stone Age. *PLOS ONE* **12**, e0176317 (2017). 10.1371/journal.pone.0176317
35. Barham, L. S. Systematic Pigment Use in the Middle Pleistocene of South-Central Africa. *Curr. Anthropol.* **43**, 181–190 (2002). 10.1086/338292
36. Dayet, L., Texier, P.-J., Daniel, F. & Porraz, G. Ochre resources from the Middle Stone Age sequence of Diepkloof Rock Shelter, Western Cape, South Africa. *J. Archaeol. Sci.* **40**, 3492–3505 (2013). 10.1016/j.jas.2013.01.025
37. Henshilwood, C. S. *et al.* A 100,000-Year-Old Ochre-Processing Workshop at Blombos Cave, South Africa. *Science* **334**, 219–222 (2011). 10.1126/science.1211535
38. Hodgskiss, T. An investigation into the properties of the ochre from Sibudu, KwaZulu-Natal, South Africa. *South. Afr. Humanit.* **24**, 99–120 (2012).
39. Mackay, A. & Welz, A. Engraved ochre from a Middle Stone Age context at Klein Kliphuis in the Western Cape of South Africa. *J. Archaeol. Sci.* **35**, 1521–1532 (2008). 10.1016/j.jas.2007.10.015
40. Marean, C. W. *et al.* Early human use of marine resources and pigment in South Africa during the Middle Pleistocene. *Nature* **449**, 905–908 (2007). 10.1038/nature06204
41. Shipton, C. *et al.* 78,000-year-old record of Middle and Later Stone Age innovation in an East African tropical forest. *Nat. Commun.* **9**, 1832 (2018). 10.1038/s41467-018-04057-3
42. Rosso, D. E. The first uses of colour: what do we know? *J. Anthropol. Sci.* **100**, 45–69 (2022). 10.4436/JASS.10005



43. Dapschaskas, R., Göden, M. B., Sommer, C. & Kandel, A. W. The Emergence of Habitual Ochre Use in Africa and its Significance for The Development of Ritual Behavior During The Middle Stone Age. *J. World Prehistory* **35**, 233–319 (2022). 10.1007/s10963-022-09170-2
44. Bodu, P. *et al.* An open-air site from the recent Middle Palaeolithic in the Paris Basin (France): Les Bossats at Ormesson (Seine-et-Marne). *Quat. Int.* **331**, 39–59 (2014). doi:10.1016/j.quaint.2013.10.029
45. Dayet, L. *et al.* Manganese and iron oxide use at Combe-Grenal (Dordogne, France): A proxy for cultural change in Neanderthal communities. *J. Archaeol. Sci. Rep.* **25**, 239–256 (2019). 10.1016/j.jasrep.2019.03.027
46. Peresani, M., Vanhaeren, M., Quaggiotto, E., Queffelec, A. & d’Errico, F. An Ochered Fossil Marine Shell from the Mousterian of Fumane Cave, Italy. *PLOS ONE* **8**, e68572 (2013). 10.1371/journal.pone.0068572
47. Peyrony, D. Le Moustier : ses gisements, ses industries, ses couches géologiques. *Rev. Anthropol.* **40**, 48–76, 155–176 (1930).
48. Soressi, M. *et al.* Pech-de-l’Azé I (Dordogne, France) : nouveau regard sur un gisement moustérien de tradition acheuléenne connu depuis le XIXème siècle. *Mém. Société Préhistorique Fr.* **47**, 95–132 (2008).
49. Bar-Yosef Mayer, D. E., Vandermeersch, B. & Bar-Yosef, O. Shells and ochre in Middle Paleolithic Qafzeh Cave, Israel: indications for modern behavior. *J. Hum. Evol.* **56**, 307–314 (2009). 10.1016/j.jhevol.2008.10.005
50. d’Errico, F., Salomon, H., Vignaud, C. & Stringer, C. Pigments from the Middle Palaeolithic levels of Es-Skhul (Mount Carmel, Israel). *J. Archaeol. Sci.* **37**, 3099–3110 (2010). 10.1016/j.jas.2010.07.011
51. Hovers, E., Ilani, S., Bar-Yosef, O. & Vandermeersch, B. An Early Case of Color Symbolism: Ochre Use by Modern Humans in Qafzeh Cave. *Curr. Anthropol.* **44**, 491–522 (2003). 10.1086/375869
52. Salomon, H. *et al.* Selection and heating of colouring materials in the Mousterian level of Es-Skhul (c. 100 000 years BP, Mount Carmel, Israel). *Archaeometry* **54**, 698–722 (2012). 10.1111/j.1475-4754.2011.00649.x
53. Paddayya, K. Excavation of an Acheulian Site at Hunsgi, South India. *Curr. Anthropol.* **17**, 760–761 (1976).
54. Petraglia, M. *et al.* Middle Paleolithic Assemblages from the Indian Subcontinent Before and After the Toba Super-Eruption. *Science* **317**, 114–116 (2007). 10.1126/science.1141564
55. Wang, F.-G. *et al.* Innovative ochre processing and tool use in China 40,000 years ago. *Nature* **603**, 284–289 (2022). 10.1038/s41586-022-04445-2.

56. Dayet, L., Le Bourdonnec, F.-X., Daniel, F., Porraz, G. & Texier, P.-J. Ochre Provenance and Procurement Strategies During The Middle Stone Age at Diepkloof Rock Shelter, South Africa. *Archaeometry* **58**, 807–829 (2016). 10.1111/arc.12202
57. Hodgskiss, T. Ochre Use in the Middle Stone Age at Sibudu, South Africa: Grinding, Rubbing, Scoring and Engraving. *J. Afr. Archaeol.* **11**, 75–95 (2013). 10.3213/2191-5784-10232
58. Moyo, S. *et al.* Blombos Cave: Middle Stone Age ochre differentiation through FTIR, ICP OES, ED XRF and XRD. *Quat. Int.* **404**, 20–29 (2016). 0.1016/j.quaint.2015.09.041
59. Popelka-Filcoff, R. S. & Zipkin, A. M. The archaeometry of ochre sensu lato: A review. *J. Archaeol. Sci.* **137**, 105530 (2022). 10.1016/j.jas.2021.105530
60. d’Errico, F. *et al.* Trajectories of cultural innovation from the Middle to Later Stone Age in Eastern Africa: Personal ornaments, bone artifacts, and ochre from Panga ya Saidi, Kenya. *J. Hum. Evol.* **141**, 102737 (2020). 10.1016/j.jhevol.2019.102737
61. Rosso, D. E., d’Errico, F. & Queffelec, A. Patterns of change and continuity in ochre use during the late Middle Stone Age of the Horn of Africa: the Porc-Epic Cave record. *PLOS ONE* **12**, e0177298 (2017). 10.1371/journal.pone.0177298
62. Clark, J. D. & Kurashina, H. An Analysis of Earlier Stone Age Bifaces from Gadeb (Locality 8E), Northern Bale Highlands, Ethiopia. *South Afr. Archaeol. Bull.* **34**, 93–109 (1979). 10.2307/3887867
63. Leakey, L. S. B. Recent discoveries at Olduvai Gorge, Tanganyika. *Nature* **181**, 1099–1103 (1958). 10.1038/1811099a0
64. Mirazón Lahr, M. & Foley, R. A. Human Evolution in Late Quaternary Eastern Africa in *Africa from MIS 6-2 - Population Dynamics and Paleoenvironments* (eds. Jones, S. C. & Stewart, B. A.) 215–231 (Springer, 2016). 10.1007/978-94-017-7520-5\_12
65. Tryon, C. A. & Faith, J. T. Variability in the Middle Stone Age of Eastern Africa. *Curr. Anthropol.* **54**, S234–S254 (2013). 10.1086/673752
66. Chavaillon, J. & Berthelet, A. The archaeological sites of Melka Kunture in *Studies on the Early Paleolithic site of Melka Kunture, Ethiopia*. (eds. Chavaillon, J. & Piperno, M.) 25–80 (Origines, 2004).
67. Deino, A. L. & McBrearty, S. <sup>40</sup>Ar/<sup>39</sup>Ar dating of the Kapthurin Formation, Baringo, Kenya. *J. Hum. Evol.* **42**, 185–210 (2002). 10.1006/jhev.2001.0517
68. McBrearty, S. The Middle Pleistocene of East Africa in *Human roots: Africa and Asia in the Middle Pleistocene*. (eds. Barham, L. & Robson Brown, K.) 81–92 (Western Academic and Specialist Press, 2001).
69. Van Peer, P., Rots, V. & Vroomans, J.-M. A story of colourful diggers and grinders. *Farming* **2004**, 1–28 (2004). 10.3828/bfarm.2004.3.1

70. Van Peer, P. *et al.* The Early to Middle Stone Age transition and the emergence of modern human behaviour at site 8-B-11, Sai Island, Sudan. *J. Hum. Evol.* **45**, 187–193 (2003). 10.1016/S0047-2484(03)00103-9
71. Conard, N. J. World Heritage and the Middle Stone Age: examples from East Africa and South Africa in *Human Origins Sites and the World Heritage Convention in Africa*. (ed. Sanz, N.) 18–30 (UNESCO, 2012).
72. Diez-Martín, F. *et al.* The Middle to Later Stone Age technological transition in East Africa. New data from Mumba Rockshelter Bed V (Tanzania) and their implications for the origin of modern human behavior. *J. Afr. Archaeol.* **7**, 147–173 (2009). 10.3213/1612-1651-10136
73. Gliganic, L. A., Jacobs, Z., Roberts, R. G., Domínguez-Rodrigo, M. & Mabulla, A. Z. P. New ages for Middle and Later Stone Age deposits at Mumba rockshelter, Tanzania: Optically stimulated luminescence dating of quartz and feldspar grains. *J. Hum. Evol.* **62**, 533–547 (2012). 10.1016/j.jhevol.2012.02.004
74. Mehlman, M. J. Late Quaternary archaeological sequences in northern Tanzania (Doctoral dissertation, University of Illinois, 1989).
75. Prendergast, M. E. *et al.* New Excavations at Mumba Rockshelter, Tanzania. *J. Afr. Archaeol.* **5**, 217–243 (2007). 10.3213/1612-1651-10093
76. Tryon, C. A. & Ranhorn, K. New Radiocarbon Dates from Nasera Rockshelter (Tanzania): Implications for Studying Spatial Patterns in Late Pleistocene Technology. *J. Afr. Archaeol.* **16**, (2018). 10.1163/21915784-20180011
77. Inskeep, R. R. The age of the Kondoa rock paintings in the light of recent excavations at Kisese II rock shelter in *Actes du IVe Congrès Panafricain de Préhistoire et l'Étude du Quaternaire* (eds. Mortelmans, G. & Nenquin, J.) 249–256 (Musée royal de l'Afrique centrale, 1962).
78. Leakey, M. *Africa's vanishing art: the rock paintings of Tanzania*. (Doubleday, 1983).
79. Tryon, C. A. *et al.* Middle and Later Stone Age chronology of Kisese II rockshelter (UNESCO World Heritage Kondoa Rock-Art Sites), Tanzania. *PLOS ONE* **13**, e0192029 (2018). 10.1371/journal.pone.0192029
80. Ambrose, S. H. Chronology of the Later Stone Age and Food Production in East Africa. *J. Archaeol. Sci.* **25**, 377–392 (1998). 10.1006/jasc.1997.0277
81. Brandt, S., Hildebrand, E., Vogelsang, R., Wolfhagen, J. & Wang, H. A new MIS 3 radiocarbon chronology for Mochena Borago Rockshelter, SW Ethiopia: Implications for the interpretation of Late Pleistocene chronostratigraphy and human behavior. *J. Archaeol. Sci. Rep.* **11**, 352–369 (2017). 10.1016/j.jasrep.2016.09.013
82. Brandt, S. A. *et al.* Early MIS 3 occupation of Mochena Borago Rockshelter, Southwest Ethiopian Highlands: Implications for Late Pleistocene archaeology, paleoenvironments and modern human dispersals. *Quat. Int.* **274**, 38–54 (2012). 10.1016/j.quaint.2012.03.047

83. Kelsey, B., Brandt, S., Zipkin, A. M. & Wilson, E. Provenance of ochre at Mochena Borago Rockshelter, SW Ethiopia: an interdisciplinary approach. East African Association for Paleoanthropology and Paleontology (EAAPP) seventh biennial conference, Nairobi. <https://eaappinfo.wordpress.com/2019-2/> (2019).
84. Clark, J. D. The Middle Stone Age of East Africa and the beginnings of regional identity. *J. World Prehistory* **2**, 235–305 (1988). 10.1007/BF00975618
85. Leakey, L. S. B. The Industries of the Gorgora rock shelter, lake Tana. *J. East Afr. Nat. Hist. Soc.* **XVII**, 199–203 (1943).
86. Moysey, F. Excavation of a rockshelter at Gorgora, Lake Tana, Ethiopia. *J. East Afr. Uganda Nat. Hist. Soc.* **17**, 196–198 (1943).
87. Yellen, J. *et al.* The Archaeology of Aduma Middle Stone Age Sites in the Awash Valley, Ethiopia. *PaleoAnthropology* **10**, 25–100 (2005).
88. Leplongeon, A. Microliths in the Middle and Later Stone Age of eastern Africa: New data from Porc-Epic and Goda Buticha cave sites, Ethiopia. *Quat. Int.* **343**, 100–116 (2014). 10.1016/j.quaint.2013.12.002
89. Pleurdeau, D. *et al.* Cultural change or continuity in the late MSA/Early LSA of southeastern Ethiopia? The site of Goda Buticha, Dire Dawa area. *Quat. Int.* **343**, 117–135 (2014). 10.1016/j.quaint.2014.02.001
90. Tribolo, C. *et al.* Across the Gap: Geochronological and Sedimentological Analyses from the Late Pleistocene-Holocene Sequence of Goda Buticha, Southeastern Ethiopia. *PLOS ONE* **12**, e0169418 (2017). 10.1371/journal.pone.0169418
91. Rosso, D. E., Martí, A. P. & d’Errico, F. Middle Stone Age Ochre Processing and Behavioural Complexity in the Horn of Africa: Evidence from Porc-Epic Cave, Dire Dawa, Ethiopia. *PLOS ONE* **11**, e0164793 (2016). 10.1371/journal.pone.0164793
92. Rosso, D. E., d’Errico, F. & Zilhão, J. Stratigraphic and spatial distribution of ochre and ochre processing tools at Porc-Epic Cave, Dire Dawa, Ethiopia. *Quat. Int.* **343**, 85–99 (2014). 10.1016/j.quaint.2013.10.019
93. Teilhard de Chardin, P. Le Paléolithique en Somalie française et en Abyssinie. *Anthropol.* **40**, 331–334 (1930).
94. Teilhard de Chardin, P., Breuil, H. & Wernert, P. Les Industries lithiques de Somalie française. *Anthropol.* **49**, 497–522 (1940).
95. Clark, J. D. & Williamson, K. D. A Middle Stone Age occupation site at Porc Epic Cave, Dire Dawa (east-central Ethiopia), Part I. *Afr. Archaeol. Rev.* **2**, 37–64 (1984). 10.1007/BF01117225
96. Breuil, H. Peintures rupestres préhistoriques du Harrar (Abyssinie). *L’Anthropologie* **44**, 473–483 (1934). 10.3406/crai.1934.86588

97. Clark, J. D. & Williams, M. A. J. Recent Archaeological Research in Southeastern Ethiopia. 1974 - 1975. *Ann. Ethiop.* **11**, 19–44 (1978). 10.3406/ethio.1978.902
98. Pleurdeau, D. *Gestion des matières premières et comportements techniques dans le Middle Stone Age africain : les assemblages lithiques de la grotte du Porc-Épic, Dire Dawa, Éthiopie* (British Archaeological Reports International Series;1317: Archaeopress, 2004).
99. Assefa, Z. Faunal remains from Porc-Epic: Paleoeological and zooarchaeological investigations from a Middle Stone Age site in southeastern Ethiopia. *J. Hum. Evol.* **51**, 50–75 (2006). 10.1016/j.jhevol.2006.01.004
100. Michels, J. W. & Marean, C. A. A Middle Stone Age occupation site at Porc Epic Cave, Dire Dawa (east-central Ethiopia), Part II. *Afr. Archaeol. Rev.* **2**, 64–71 (1984). 10.1007/BF01117225
101. Anovitz, L. M., Elam, J. M., Riciputi, L. R. & Cole, D. R. The Failure of Obsidian Hydration Dating: Sources, Implications, and New Directions. *J. Archaeol. Sci.* **26**, 735–752 (1999). 10.1006/jasc.1998.0342
102. Ridings, R. Where in the World Does Obsidian Hydration Dating Work? *Am. Antiq.* **61**, 136–148 (1996). 10.2307/282308
103. Assefa, Z., Lam, Y. M. & Mienis, H. K. Symbolic Use of Terrestrial Gastropod Opercula during the Middle Stone Age at Porc-Epic Cave, Ethiopia. *Curr. Anthropol.* **49**, 746–756 (2008). 10.1086/589509
104. Bronk Ramsey, C. Radiocarbon calibration and analysis of stratigraphy; the OxCal program. *Radiocarbon* **37**, 425–430 (1995).
105. Breuil, H., Teilhard de Chardin, P. & Wernert, P. Le Paléolithique du Harrar. *L'Anthropologie* **55**, 219–230 (1951).
106. Leplongeon, A. La transition Middle Stone Age / Later Stone Age en Afrique de l'Est (Ethiopie) (Doctoral dissertation, Muséum National d'Histoire Naturelle, 2013).
107. Negash, A. & Shackley, M. S. Geochemical provenance of obsidian artefacts from the MSA site of Porc Epic, Ethiopia. *Archaeometry* **48**, 1–12 (2006). 10.1111/j.1475-4754.2006.00239.x
108. Perlès, C. Réexamen Typologique de L'Industrie du Porc-Épic Éthiopie : Les Pointes et Pièces Pointues. *Anthropol.* **78**, 529–551 (1974).
109. Pleurdeau, D. Human Technical Behavior in the African Middle Stone Age: The Lithic Assemblage of Porc-Epic Cave (Dire Dawa, Ethiopia). *Afr. Archaeol. Rev.* **22**, 177–197 (2005). 10.1007/s10437-006-9000-7
110. Pleurdeau, D. The lithic assemblage of the 1975-1976 excavation of the Porc-Epic Cave, Dire-Dawa, Ethiopia. Implications for the East African Middle Stone Age. *J. Afr. Archaeol.* **3**, 117–126 (2005). 10.3213/1612-1651-10040

111. Pleurdeau, D. Le Middle Stone Age de la grotte du Porc-Épic (Dire Dawa, Éthiopie) : gestion des matières premières et comportements techniques. *Anthropol.* **107**, 15–48 (2003). 10.1016/S0003-5521(02)00003-1
112. Vogel, N., Nomade, S., Negash, A. & Renne, P. R. Forensic  $^{40}\text{Ar}/^{39}\text{Ar}$  dating: a provenance study of Middle Stone Age obsidian artifacts from Ethiopia. *J. Archaeol. Sci.* **33**, 1749–1765 (2006). 10.1016/j.jas.2006.03.008
113. Robinson, J. R. Thinking locally: Environmental reconstruction of Middle and Later Stone Age archaeological sites in Ethiopia, Kenya, and Zambia based on ungulate stable isotopes. *J. Hum. Evol.* **106**, 19–37 (2017). 10.1016/j.jhevol.2017.01.013
114. Robinson, J. R. Investigating habitat heterogeneity of Late Pleistocene archaeological sites in eastern Africa from stable isotopes. *Hist. Biol.* **34**, 674–693 (2022). 10.1080/08912963.2021.1942465
115. Vallois, H. V. La Mandibule Humaine Fossile de la Grotte du Porc-Épic près de Diré-Daoua Abyssinie. *Anthropol.* **55**, 231–238 (1951).
116. Whitney, D. L. & Evans, B. W. Abbreviations for names of rock-forming minerals. *Am. Mineral.* **95**, 185–187 (2010).
117. Hodgskiss, T. Cognitive Requirements for Ochre Use in the Middle Stone Age at Sibudu, South Africa. *Camb. Archaeol. J.* **24**, 405–428 (2014). 10.1017/S0959774314000663
118. Hodgskiss, T. Identifying grinding, scoring and rubbing use-wear on experimental ochre pieces. *J. Archaeol. Sci.* **37**, 3344–3358 (2010). 10.1016/j.jas.2010.08.003
119. Adams, J. *et al.* Functional analysis of macro-lithic artefacts in *Non-flint Raw Material Use in Prehistory: Old Prejudices and New Directions. Proceedings of the XV Congress of the UISPP; 2006 Sept 4–9; Lisbon, Portugal* (eds. Sternke, F., Eigeland, L. & Costa, L.-J.) 43–66 (British Archaeological Reports, International Series;1939: Archaeopress, 2009).
120. de Beaune, S. *Pour une archéologie du geste : Broyer, moudre, piler, des premiers chasseurs aux premiers agriculteurs* (CNRS Editions, 2000).
121. Downs, R. T. The RRUFF Project: an integrated study of the chemistry, crystallography, Raman and infrared spectroscopy of minerals in *Program and Abstracts of the 19th General Meeting of the International Mineralogical Association in Kobe, Japan* 3–13 (2006).
